# Supplementary material for: CGMega: explainable graph neural network framework with attention mechanisms for cancer gene module dissection
Source: PubMed Central journal article supplement (PMC11252405; doi:10.1038/s41467-024-50426-6), 2024-07-17
Supplement: 41467_2024_50426_MOESM1_ESM.pdf [file 41467_2024_50426_MOESM1_ESM.pdf]

# **CGMega: Explainable Graph Neural Network Framework with Attention Mechanisms for Cancer Gene Module Dissection**

## **Supplemental Information**

### **Supplementary Figures**

Fig. S1 robustness of GNNExplainer in CGMega

Fig. S2 CGMega performance in cancer gene prediction task

Fig. S3 Methods comparison on input data with or without Hi-C

Fig. S4 Gene modules in breast cancer cell line

Fig. S5 Inhibitor combination experiments in breast cancer cell line

Fig. S6 Gene modules in AML patients

### **Supplementary Tables**

Supplementary Table 1. The reported dataset in the main text (Dataset-1) and an external one (Dataset-2) for robustness evaluation on CGMega

Supplementary Table 2. CGMega performance across different breast cancer datasets

Supplementary Table 3. Candidate AML genes identified by CGMega in total

Supplementary Table 4. Candidate AML genes present in all AML patients

Supplementary Table 5. Candidate AML genes present in known AML gene modules for AML patient

Supplementary Table 6. Patient-specific candidate AML genes

# Figure S1

**a**

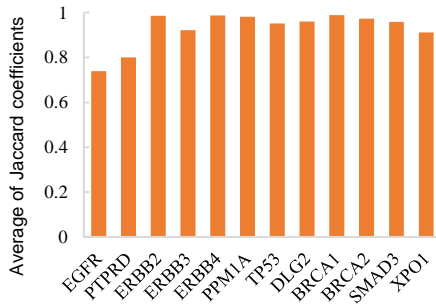

**b**

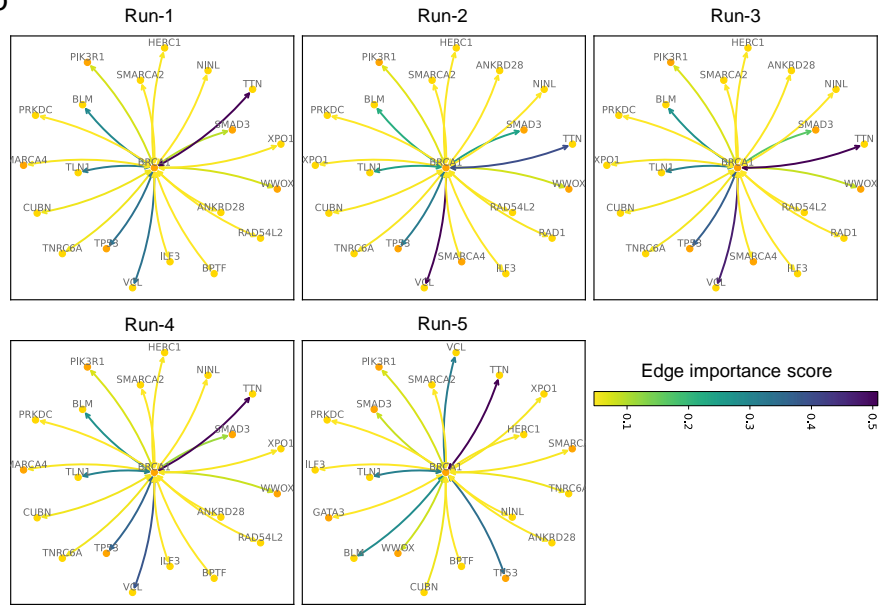

**Fig. S1 robustness of GNNExplainer in CGMega.** **a** We repeated GNNExplainer five times on 12 randomly selected cancer genes, and calculated the average Jaccard coefficients between any two repeats. **b** Taken BRCA1 gene module as an example to show the robustness of GNNExplainer interpretation. Source data are provided as a Source Data file.

**Figure S2**

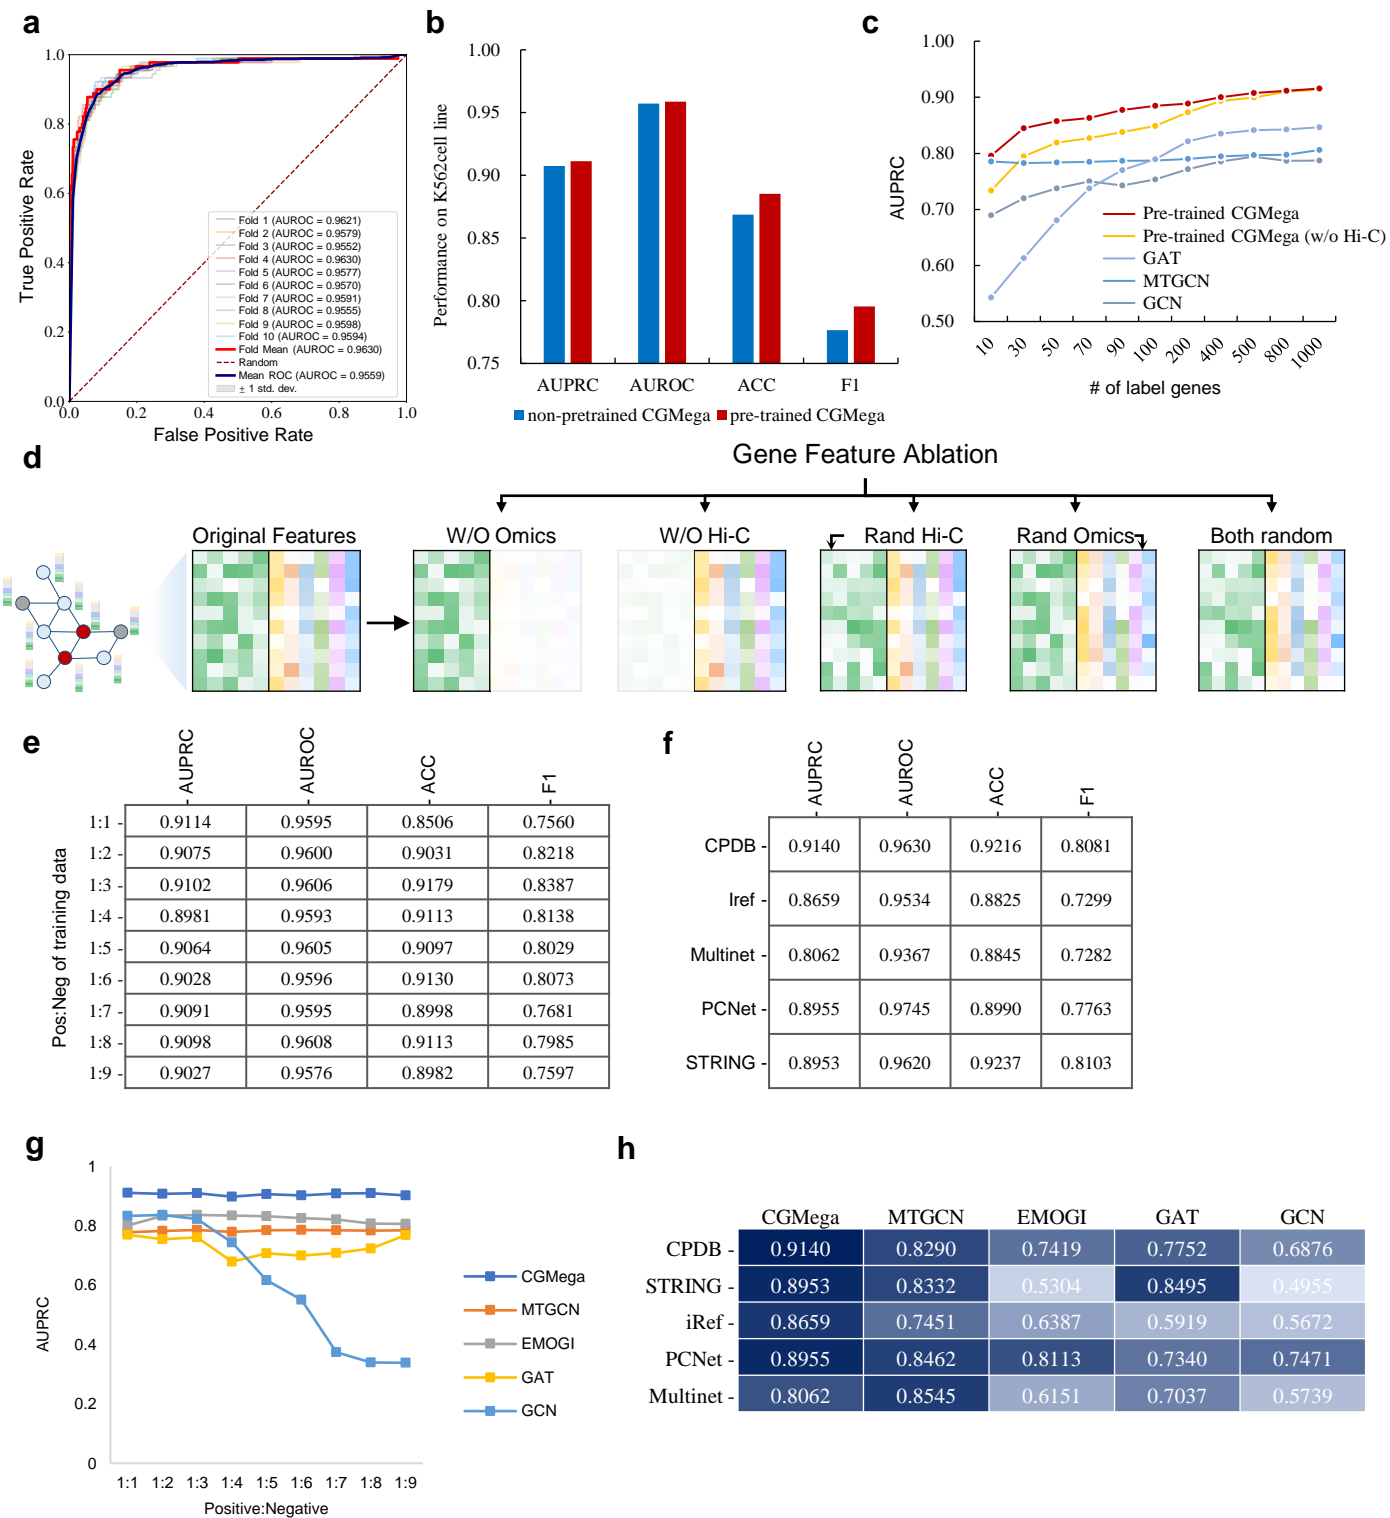

**Fig. S2 CGMega performance in cancer gene prediction task. a** AUROC on breast cancer cell line MCF7. **b** Performance of non-pre-trained and pre-trained CGMega on K562 cell line. **c** Methods comparison on datasets with different number of labeled genes. **d** Gene feature ablation illustration. Five types of feature ablation inputs were generated, including the removal of omics feature and Hi-C feature and random generation of Hi-C feature, omics feature, and both omics and Hi-C features. **e** Performance of CGMega on datasets with different positive to negative ratios. **f** Performance of CGMega on different PPI databases. **g** AUROCs of different methods on datasets with different positive to negative ratios. **h** AUPRC of different methods on different PPI datasets. Source data are provided as a Source Data file.

**Figure S3**

**a**

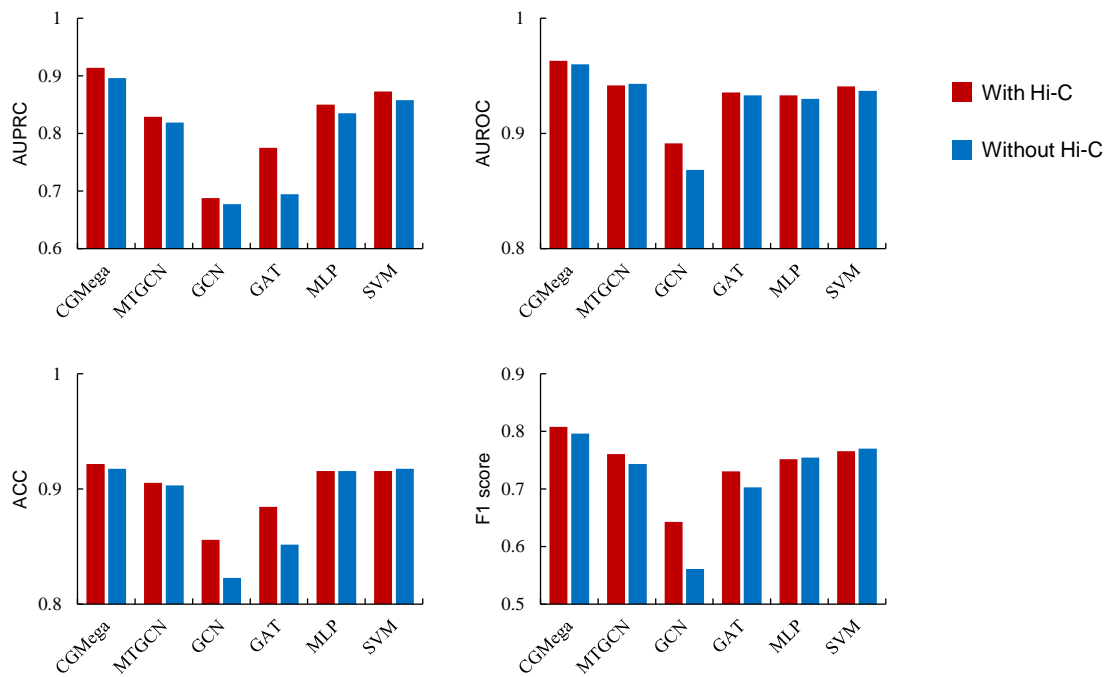

**Fig. S3 a** Methods comparison on input data with or without Hi-C. Source data are provided as a Source Data file.

**Figure S4****a**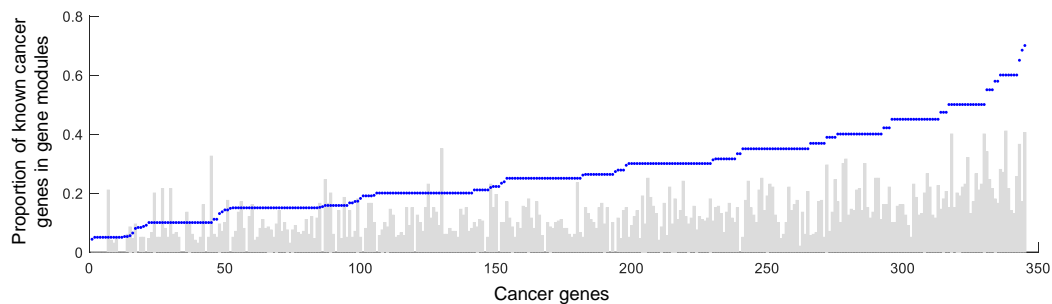**b**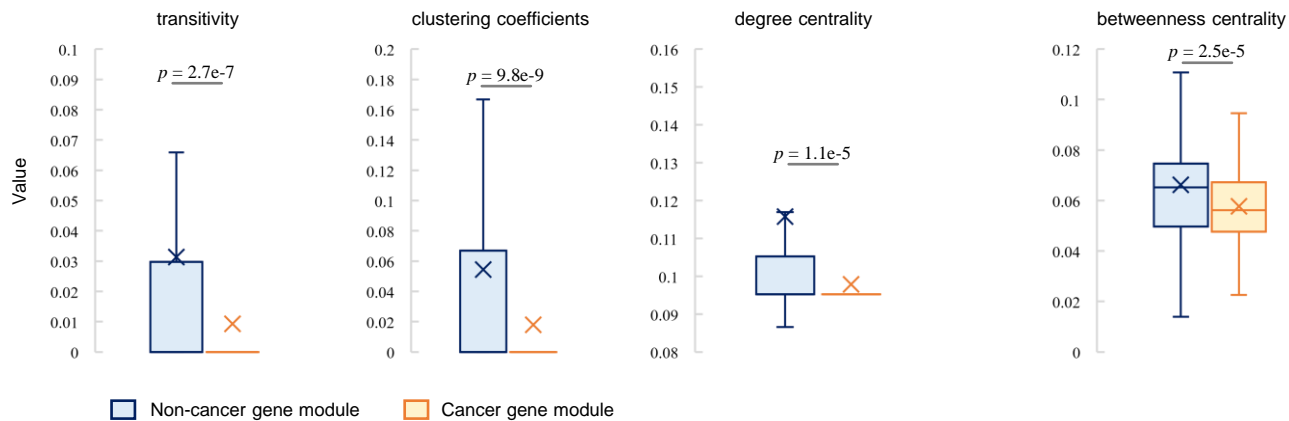**c**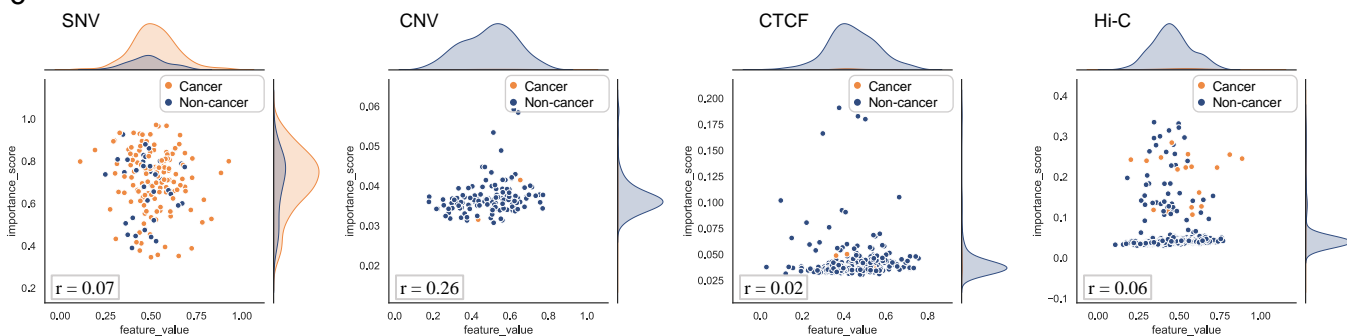**d**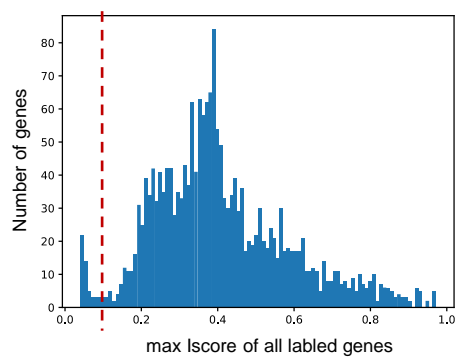**e**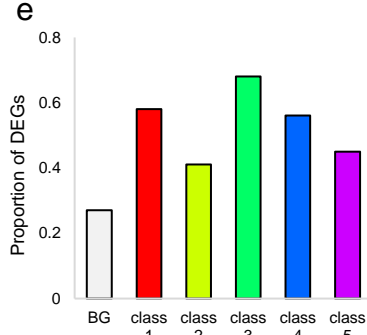**f**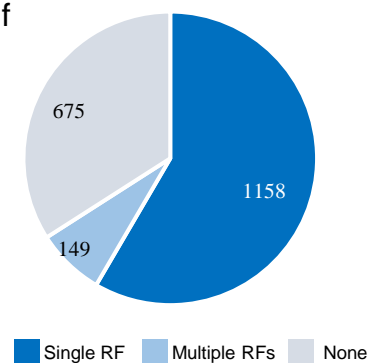**g**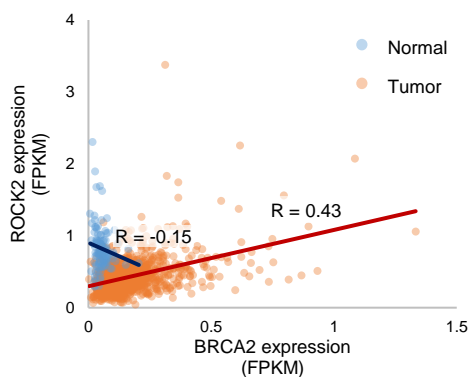

**Fig. S4 Gene modules in breast cancer cell line.** **a** For each cancer gene module, the proportion of known cancer genes was calculated (blue dots). Random gene modules with the same number of genes was shuffled 100 times, and the average proportion of known cancer genes in the module was calculated (gray bars). **b** Graphical metrics of gene modules, p values were calculated by paired t-test. **c** Scatter plots show the distributions of raw feature inputs and importance scores calculated by GNNExplainer. **d** Distribution of the highest importance score of genes showed that only dozens of genes with importance score lower than 0.1 (red line). **e** Proportion of DEGs in each class, data were from TCGA project, colors of each class corresponded to Fig. 4b. **f** Distribution of genes with different numbers of RFs. **g** scatter plot showing the co-expression of BRCA2 and ROCK2 in normal (blue dots) and tumor (orange dots), expression data were obtained from TCGA project. Source data are provided as a Source Data file.

# Figure S5

Treated with BRCA2 inhibitor olaparib alone

a

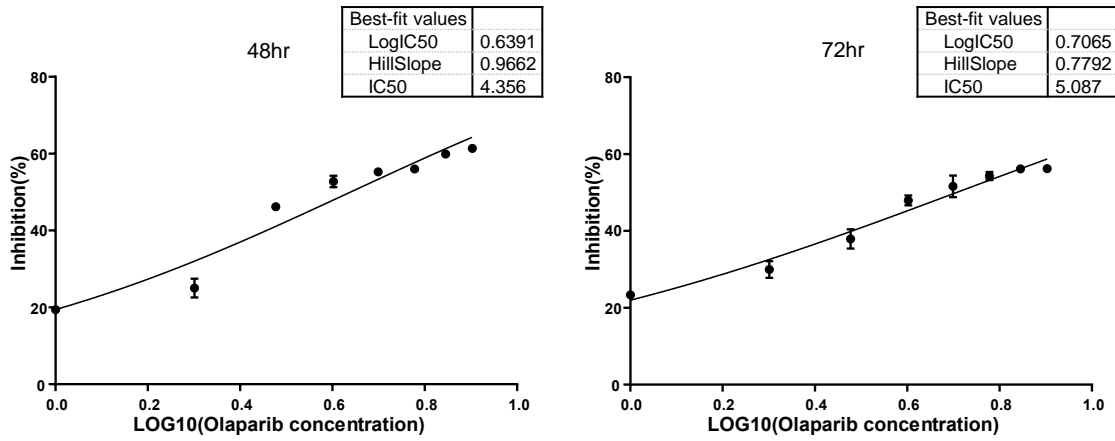

Treated with BRCA2 inhibitor olaparib and ROCK2 inhibitor RKI-1447

b

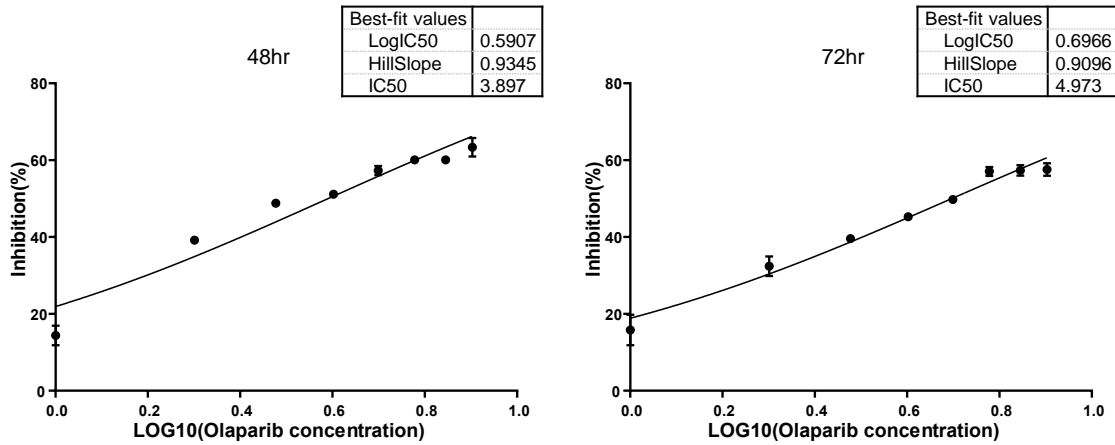

c

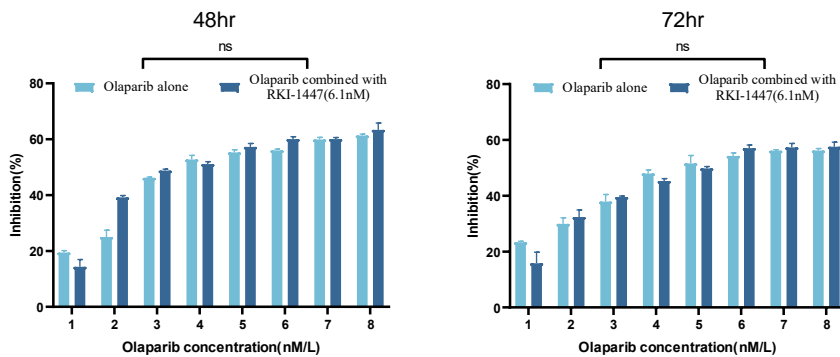

d

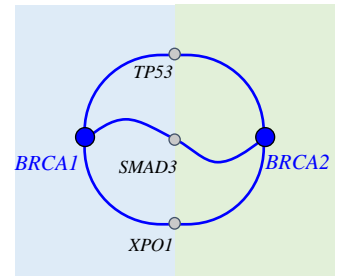

**Fig. S5 Inhibitor combination experiments in breast cancer cell line.** a,b Half maximal inhibitory concentration ( $IC_{50}$ ) value of olaparib treatment (a) and olaparib/RKI-1447 combination treatment (b) after 48 hr and 72 hr. c Paired *t*-test analysis based on the inhibition rates between olaparib alone and olaparib/RKI-1447 combination after 48 hr treatment (left) and 72 hr treatment (right). Paired *t*-test was used to analyze the two groups. d *BRCA1* and *BRCA2* gene modules formed a high-order gene module through three shared genes including *TP53*, *SMAD3*, and *XPO1*. Source data are provided as a Source Data file.

## Figure S6

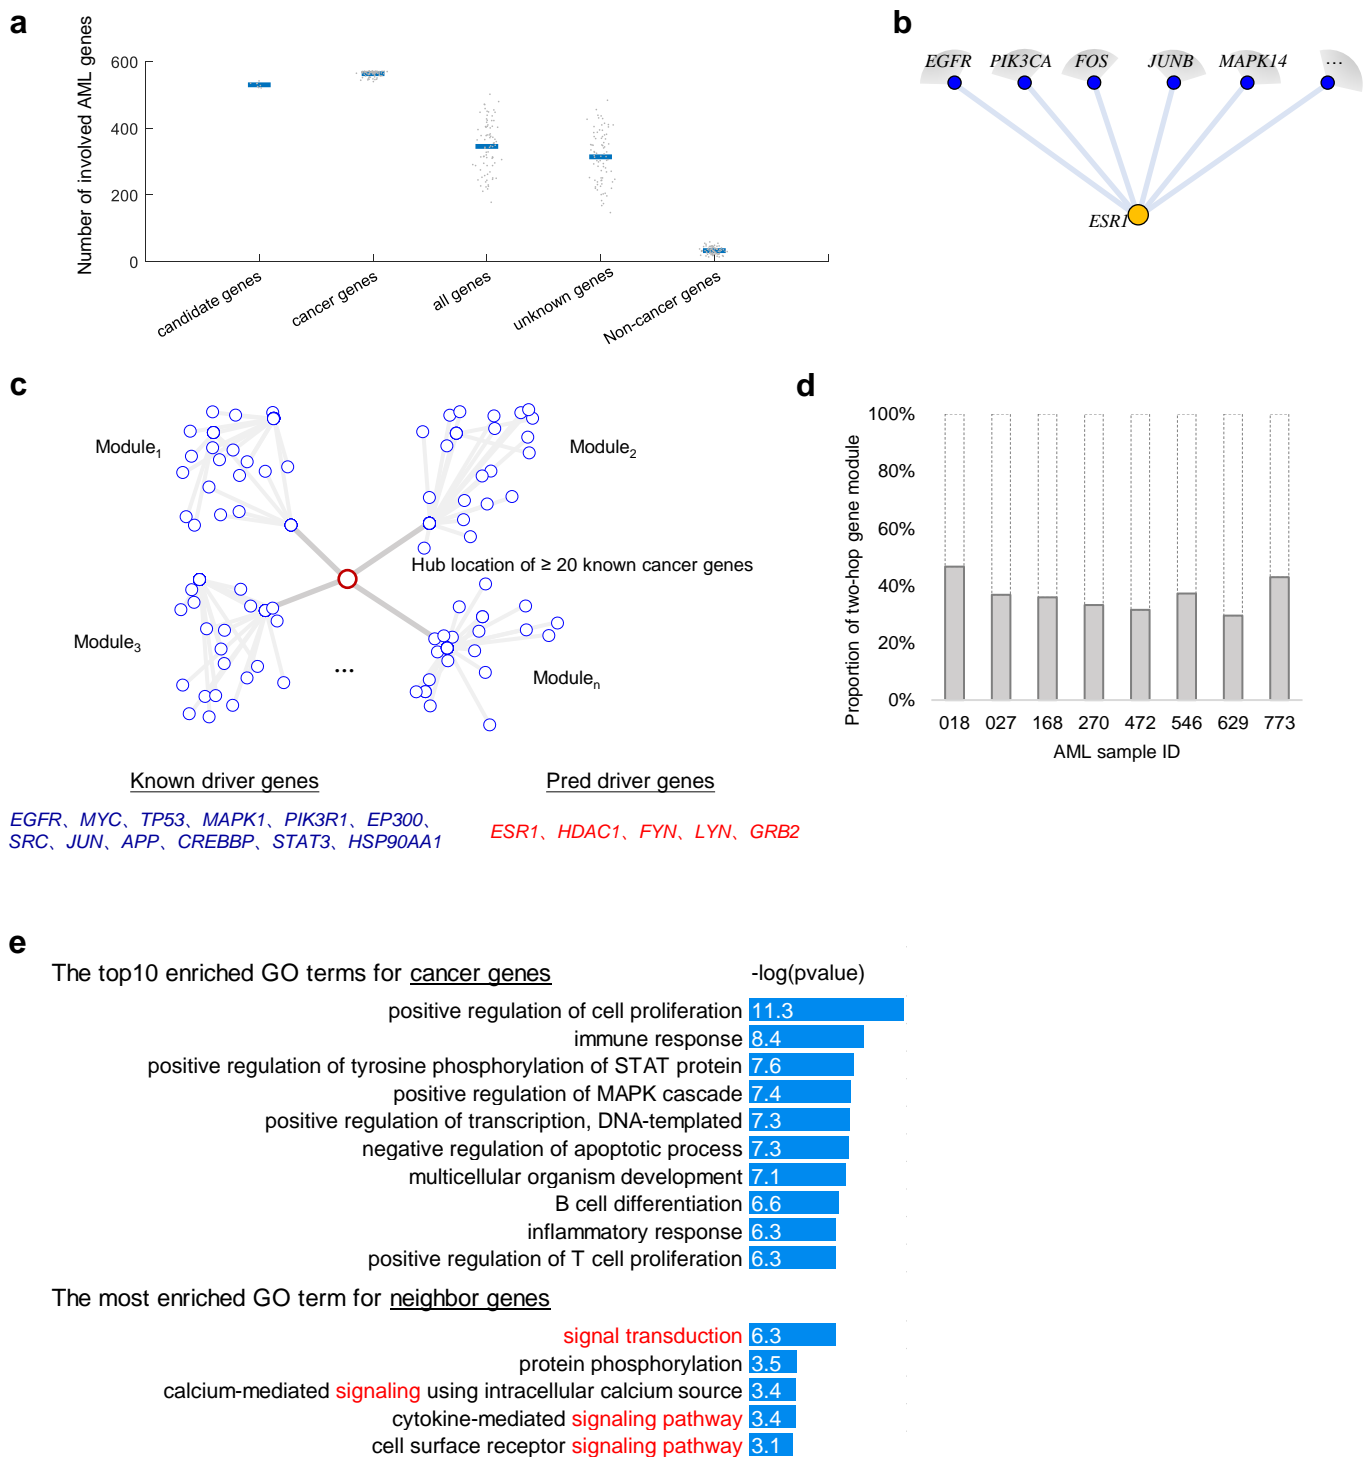

**Fig. S6 Gene modules in AML patients.** **a** Number of AML genes present in the module of candidate gene set and other gene set (10 times randomly sampled with the same size). Each dot in the first column (candidate genes) or from the second to the fifth column (other genes) indicates the scale of involved AML genes in the corresponding gene set. **b** Illustration of *ESR1* in various cancer gene modules. Gray background indicates other parts of gene modules expect *ESR1*. **c** Illustration showing the 12 known AML genes and 5 candidate AML genes in all eight AML samples. **d** Proportion of two-hop patterns in AML gene modules for each AML sample. **e** GO analysis for genes in 142 neighbor-cancer gene pairs. For cancer genes, we shows the top 10 GO terms. For neighbor genes, only 5 GO term were significant (P value < 1e-3). GO analysis was conducted using DAVID. Source data are provided as a Source Data file.



**Supplementary Table 1.** The reported dataset in the main text (Dataset-1) and an external one (Dataset-2) for robustness evaluation on CGMega

|                 | <b>Dataset-1</b>                                                    | <b>Dataset-2</b>                                                       |
|-----------------|---------------------------------------------------------------------|------------------------------------------------------------------------|
| <b>H3K4me3</b>  | <u>ENCODE project</u><br>ENCFF145CCI / ENCFF268RXB                  | <u>ENCODE project</u><br>ENCFF078BWS /<br>ENCFF251QQR                  |
| <b>H3K27ac</b>  | <u>ENCODE project</u><br>ENCFF340KSH / ENCFF491LQY                  | <u>ENCODE project</u><br>ENCFF054VCV /<br>ENCFF071XTD                  |
| <b>ATAC-seq</b> | <u>ENCODE project</u><br>ENCFF821OEF                                | <u>ENCODE project</u><br>ENCFF976UNK                                   |
| <b>CTCF</b>     | <u>ENCODE project</u><br>ENCFF138LHE / ENCFF163JHE /<br>ENCFF198YOJ | <u>ENCODE project</u><br>ENCFF157EYO /<br>ENCFF237BZX /<br>ENCFF915BMD |
| <b>CNV</b>      | <u>TCGA project</u><br>530 Breast cancer samples                    | <u>TCGA project</u><br>106 randomly selected Breast<br>cancer samples  |
| <b>SNV</b>      | <u>TCGA project</u><br>4 Breast cancer samples                      | <u>TCGA project</u><br>2 randomly selected Breast<br>cancer samples    |
| <b>Hi-C</b>     | <u>Genome Biology, 2015</u><br>GSE66733                             | <u>Nucleic Acids Research, 2021</u><br>GSE182306                       |

**Supplementary Table 2.** CGMega performance across different breast cancer datasets

| <b>CGMega performance across different breast cancer datasets</b> |              |              |            |           |
|-------------------------------------------------------------------|--------------|--------------|------------|-----------|
|                                                                   | <b>AUPRC</b> | <b>AUROC</b> | <b>ACC</b> | <b>F1</b> |
| Dataset-1 (Reported in<br>paper)                                  | 0.9140       | 0.9630       | 0.9216     | 0.8081    |
| Dataset-2                                                         | 0.9072       | 0.9627       | 0.9320     | 0.8272    |

**Supplementary Table 3. Candidate AML genes identified by CGMega in total**

|         |         |         |         |          |         |          |          |         |         |
|---------|---------|---------|---------|----------|---------|----------|----------|---------|---------|
| MATN2   | SMC3    | UBC     | PRKACA  | FOXO1    | BSN     | FER      | DCC      | CEP120  | EIF4E   |
| KRT8    | CASK    | PRKD1   | TNKS2   | DYRK1A   | EPB41L3 | PRKCE    | PPP2R2B  | KAT2B   | SMAD2   |
| NRG1    | RARB    | VTN     | RPS6KA2 | CTNND2   | LARP7   | NFATC2   | TNK2     | CUL3    | ANK2    |
| HNRNPM  | PDPK1   | AKAP12  | ELN     | HNRNPU   | KAT5    | NTRK2    | FAF1     | SNW1    | TANC1   |
| SHANK1  | TRPC3   | CGN     | MAP3K5  | PRKG1    | E2F3    | KHDRBS2  | HCK      | STAT1   | AMOT    |
| BICD1   | GSN     | CTBP1   | EXOC1   | SF1      | PXN     | ITPR1    | SMAD3    | SMARCE1 | SHC1    |
| DYNC111 | MCM3    | POR     | SPTAN1  | ANK1     | IFT74   | SMARCC1  | GRIN2B   | ALMS1   | POU2F1  |
| HIPK2   | CAMK2D  | TP63    | SNX9    | KCNIP4   | PDE4D   | MAPK10   | AP2M1    | YWHAG   | RG7     |
| CDC16   | ACTN4   | EZR     | SREBF2  | ESRRA    | IQGAP1  | ACTA1    | FLNC     | CDC5L   | KCND2   |
| MYO6    | AP2S1   | DLGAP2  | CD2AP   | ANXA7    | THRA    | SUMO1    | ITGB5    | NCOR2   | MEF2A   |
| HDAC6   | RTN4    | KCNB2   | HNRNPD  | NUDC     | RBPJ    | XRCC6    | TSHR     | PLA2G4A | PPM1A   |
| GAN     | TNKS    | NTM     | ATXN1   | FBN1     | TEAD2   | MEF2C    | DNM3     | DAB2    | DAG1    |
| SIRT6   | CHCHD3  | DLGAP3  | GRB2    | HOMER1   | PRKDC   | SMAD1    | RPA1     | PTPRA   | DTNBP1  |
| HDAC7   | CDC25C  | PRKAR1A | ECT2    | PTK2     | DLG1    | AMPH     | PABPC1   | AP2B1   | CEP128  |
| LATS2   | KIF13B  | PTPRB   | MET     | FYN      | FOXJ2   | S100A10  | GRB10    | CPSF6   | HNRNPA1 |
| NIN     | CAMK2B  | MYH9    | TUBA1B  | LYN      | YWHAH   | CARM1    | PTPRK    | EXOC2   | PLEKHA7 |
| MMP10   | FAM20C  | PTBP3   | NCOA2   | CALM3    | CCT7    | ADRB2    | GRID2    | PSEN1   | GNA12   |
| HDAC5   | SMARCA4 | LEF1    | ETS1    | PHGDH    | TGFBR2  | IMMP2L   | KIAA0753 | ACTA2   | XRCC5   |
| TYK2    | SP1     | TAB2    | LMNA    | VAV3     | FBN2    | SGK1     | GAK      | NME7    | FLNA    |
| EPHA4   | NCOR1   | PPP3CA  | PPP1CB  | EGLN3    | SUMO2   | NCOA3    | RPA2     | MAPKAP1 | GJA1    |
| GRM1    | MACF1   | KCNB1   | GRIK2   | TUBA1C   | GNA13   | CACNA1D  | HMGB1    | DLG2    | ESR1    |
| FBXW11  | PRKAR2A | DISC1   | TLN1    | NEDD4    | CEP170  | CHUK     | PDGFRA   | NR2C2   | RNF41   |
| VDAC1   | BTRC    | ANK3    | PLCG2   | HDAC1    | GAB1    | CNTRL    | SQSTM1   | OPTN    | ACTN1   |
| CEP290  | VCP     | CDC20   | EPHA2   | BCAR1    | YBX1    | GRM7     | CDK9     | PHLDB2  | CSNK1A1 |
| ROBO1   | TPM3    | TNIK    | NLGN1   | AURKA    | GNAO1   | PRKCZ    | BARD1    | YWHAB   | AKAP5   |
| BLM     | MLH1    | MED13   | PICK1   | SH3GL3   | DOCK1   | MAPT     | UBXN7    | GRIK4   | PPP2R1A |
| GRIA2   | IRS1    | PTPRR   | APPL1   | PRKCA    | PTPRJ   | ODF2     | PRKACB   | MED23   | POU6F2  |
| ARNT    | COIL    | DLC1    | NINL    | MAPK9    | PCM1    | EXOC6    | CDC14A   | SRPK2   | NRXN1   |
| ARRB1   | ESR2    | FUS     | HMGA1   | MYO19    | TRAF6   | RAD50    | PPARD    | YWHAZ   | MTOR    |
| MAD1L1  | CEP135  | HNRNPF  | CUL1    | ITSN1    | EXOC4   | LSAMP    | KIF20A   | NEB     | RPS6KA3 |
| MAG1    | MSN     | BBS7    | MED4    | TUBB     | NKX2-1  | TERF1    | ENO1     | MAX     | HTT     |
| PPP3R1  | WWTR1   | CTNND1  | ATR     | PRKCI    | RNF2    | RXRG     | STAU1    | DHX15   | PAK2    |
| GNAI2   | YES1    | ACTN2   | PLCG1   | PIK3R3   | AFAP1   | ANLN     | ROBO2    | GRM3    | PIBF1   |
| CSNK2A1 | TBP     | MAML1   | GNAI3   | LRP2     | EIF3E   | TRAF3IP1 | MAP3K3   | CNTN1   | ITGB1   |
| VAV1    | RELA    | GRIK5   | PTPRZ1  | NR2F1    | EXOC7   | ABI2     | RYR2     | PPP2R5C | HDAC3   |
| CAMK2G  | TUBB3   | TJP1    | RPA3    | PAFAH1B1 | GRIA1   | IKBKB    | PRKAR2B  | RBBP4   | DLG3    |
| PTPRG   | LIMA1   | PPARA   | ACTB    | SPTBN1   | DNM1    | RYR1     | ABI1     | TNS1    | PPM1G   |
| HSP90B1 | SVIL    | RHOA    | CAMK2A  | HSP90AB1 | ERC1    | KCNA2    | SIRT1    | SPICE1  | PAK1    |
| HOOK1   | CCT4    | TRIM28  | THRB    | RANGAP1  | CENPJ   | AHR      | IGFBP5   | TRIM24  | GNAQ    |
| CDH5    | CSNK2A2 | MAGI2   | PLK1    | DDX5     | TSC2    | ATXN2    | TTN      | OFD1    | MYO5C   |
| NETO1   | ADCY5   | TES     | SMARCB1 | NTRK3    | BIN1    | TRIM25   | SYNCRIP  | TOP1    | FOXPI   |

|           |         |         |           |         |         |         |         |          |          |
|-----------|---------|---------|-----------|---------|---------|---------|---------|----------|----------|
| DHX9      | TEAD1   | TFAP2A  | NCL       | PRKCG   | WWP2    | PIAS1   | PDE1A   | MED17    | TPM2     |
| HSPA6     | ENAH    | CEP350  | SCN2B     | GNB1    | RPTOR   | PSMD2   | DDB1    | KMT2A    | GNB5     |
| FRS3      | REL     | KAT2A   | CDH18     | CAV3    | UBE3A   | CCND3   | DVL2    | AMOTL1   | KIF5A    |
| DCN       | RAPH1   | CEP63   | TLE1      | HSPG2   | GNB2    | KIF11   | MYO18A  | FANCD2   | PSEN2    |
| SENP3     | PRKAR1B | TAF5    | PRKACG    | KIFAP3  | DRD2    | HDAC4   | VAPB    | TAF1     | PTGER3   |
| LIMK1     | EFNA5   | DYNC1I2 | EPHA8     | CALM1   | DLG4    | RIMS1   | NUMB    | WWP1     | SRSF1    |
| CEP104    | LIN7A   | COL4A3  | TPM1      | MED27   | AR      | CEP85   | NEK4    | TAB1     | UBE2E2   |
| MORF4L2   | KIF23   | VRK1    | GRIA4     | RBM47   | RYR3    | GRIN1   | SYNE2   | LTBP1    | MAD2L2   |
| RFX3      | ITCH    | PIP5K1C | PIAS2     | AP1G1   | OS9     | SORBS1  | NEBL    | LRRC49   | INSR     |
| SCRIB     | DPF2    | NTRK1   | SMARCA5   | RAP1A   | RPRD1B  | PPP1CC  | FKBP1B  | ADAMTSL1 | RAE1     |
| STON2     | MYH10   | GOPC    | PRKG2     | MED24   | CANX    | CDK8    | RPH3A   | CTBP2    | TIAM1    |
| MNAT1     | RSU1    | BICD2   | RBM14     | CAMSAP1 | WWOX    | GABARAP | CACYBP  | BLK      | MSH3     |
| BBS2      | MORF4L1 | ELMO1   | AKAP13    | PPP2R2A | MYO5B   | SUGT1   | ANKS1B  | NFE2L2   | RUVBL1   |
| IFT88     | SIAH1   | CDC27   | CIT       | RFC3    | EPS15   | MYOM2   | MYO5A   | RCC1     | ACTC1    |
| ATRX      | MIB1    | GTF2B   | SIN3A     | GLI3    | IQCB1   | SMARCD1 | MAP2    | NR1H3    | CAPZA2   |
| SATB1     | WDR5    | HAUS3   | KLHL22    | TRIM5   | ITGB3   | SUPT5H  | VWCE    | BRD4     | SOX2     |
| USH1C     | KIF14   | SMARCA2 | PRELP     | EXOC6B  | RPS6KB1 | GRIN2A  | MTUS2   | NFYA     | NR1H4    |
| VCL       | MCM5    | EFEMP1  | RDX       | GRB7    | MGAT4C  | NUP98   | SYT1    | EEA1     | GRIP1    |
| PSMA1     | RAD51   | CACNA1B | CDH23     | RNGTT   | CD81    | ATF2    | MARK4   | NONO     | FHL2     |
| PLD1      | AP2A1   | RASGRF1 | RAB3A     | GRIN3A  | MYO7A   | KCNMA1  | MTA2    | NCK2     | CACNB3   |
| ABLIM1    | WASF1   | KPNB1   | RBBP5     | NF2     | LZTS2   | CCDC14  | CHD3    | RBM39    | TBC1D31  |
| ANKRD28   | HAX1    | DCLK1   | CYLD      | C2CD3   | CIC     | ILF3    | MYCBP2  | CEP192   | GSK3B    |
| PKP4      | DYNLL1  | TCF7L2  | PDLIM7    | GSK3A   | WRAP73  | APOB    | TRIM27  | LMNB1    | NDC80    |
| TP53BP1   | PKM     | SLIT2   | CBLB      | CEP152  | CAPZA1  | KIF3A   | CORO1C  | FLNB     | PPP1R12A |
| GAB2      | LOX     | ATF7IP  | NEDD8     | VASP    | PUF60   | NFATC1  | DDX21   | ERC2     | MED1     |
| CIITA     | VDAC2   | DHPS    | TCF12     | CDH2    | RUNX2   | FBLN2   | TARDBP  | AKAP6    | IRF2     |
| BMI1      | DPF3    | TMOD1   | OCRL      | INS     | CTTN    | KCTD10  | HNRNPK  | UBB      | RAC1     |
| RPS3A     | TUBB2B  | TADA2A  | FRAS1     | CNTNAP2 | LRRK2   | SYNPO   | AGRN    | FGFR4    | NOS1     |
| DACH1     | STAG1   | TNRC6B  | SMURF1    | ATF4    | YWHAQ   | STAT5B  | RPS6KA5 | PLCB1    | OPRD1    |
| HNRNPA2B1 | PIK3CG  | TCHP    | VAPA      | SNRNP70 | SH3GL2  | MATR3   | UBE2I   | SNTB1    | OPCML    |
| GABRG2    | APC     | VAV2    | DMD       | UBAP2L  | MCRS1   | RSPRY1  | MAPRE1  | SERPINE1 | SMAD4    |
| PPP2CA    | NBN     | HMGA2   | ARRB2     | SRPK1   | COL1A1  | EPAS1   | ANXA1   | CDC37    | TCF4     |
| LASP1     | CACNA1C | HSPA2   | DDX1      | NSF     | PRKCD   | FKBP1A  | POC5    | STUB1    | MRPS22   |
| ARHGAP32  | NDEL1   | LNX1    | MYO1C     | PLB1    | NCF1    | UBE2L3  | STK11   | HTRA1    | EVC2     |
| AGO2      | DAPK1   | KRT18   | ADAM17    | CDH7    | UNC13B  | GNG2    | PTPRD   | CACNB1   | SMURF2   |
| ADAM10    | CDH8    | NCOA1   | SPTBN2    | DPYSL2  | NUP93   | GPHN    | DDB2    | ELK1     | CEP89    |
| KCND3     | CAPN1   | GRID1   | CDC73     | STX1A   | NFX1    | KCNE1   | GIPC1   | FOXC1    | GNA11    |
| GABRB3    | PSMC5   | CTNNA3  | CRK       | XPO7    | BBS4    | ELAVL1  | ILF2    | MYOM1    | ASH2L    |
| SPOP      | MED19   | TBL1X   | CNTROB    | NEK6    | TUBB4B  | CBX5    | CAMK1   | OCLN     | TRDN     |
| PTPN7     | FIP1L1  | KCNQ5   | MFAP5     | KLHL13  | EXOC3   | RAP1B   | CFL1    | PIP5K1A  | CALU     |
| BBS5      | CUL7    | TXN     | GABARAPL2 | BBS1    | GABRB2  | MCC     | GRIN2D  | NRCAM    | GNG4     |
| NAV1      | KIF2C   | SYNGAP1 | PIK3CB    | STXBP1  | TAF12   | GNG12   | CDC25B  | GTSE1    | NR1H2    |
| FOXA1     | LRWD1   | EGFL7   | TNRC6A    | PCLO    | HNRNPDL | CHD4    | FMR1    | MYH1     | RAD18    |

|            |          |          |         |          |          |          |          |          |         |
|------------|----------|----------|---------|----------|----------|----------|----------|----------|---------|
| PDE1C      | GRID2IP  | REPS1    | MED16   | MAP1A    | ESRRG    | AKAP9    | GOLGA2   | ORC2     | PLK4    |
| GABRA1     | RAB11A   | CUL2     | NUFIP1  | IFI16    | PSMC2    | RNF4     | PTPN13   | SYBU     | L3MBTL1 |
| MAPK7      | PKD1     | SSBP1    | PARD6B  | TGFB2    | CBX3     | ZC3H18   | RPGRIP1L | CEP250   | NR2F2   |
| FXR2       | MSX1     | CDC42    | TRIM37  | TUBG1    | SDHB     | EEF1D    | TGFB1    | TNFAIP3  | CHRNA7  |
| FXR1       | CSPP1    | MPDZ     | PLD2    | PIAS4    | OBSL1    | PSPC1    | PIK3R2   | BYSL     | ALK     |
| SMAD9      | CDH12    | CLTCL1   | NR1I2   | GRIA3    | STX3     | KANSL1   | TLE3     | LRRC4C   | MCM2    |
| PRKCB      | CADPS    | DAP3     | DUSP6   | MYPN     | ANKRD11  | PLEC     | MTUS1    | GNG7     | HDAC2   |
| TSC1       | ZFHX3    | EXOSC10  | RXR8    | GATAD2B  | VDAC3    | TJP2     | AVIL     | FBP2     | IGF2BP2 |
| CACNB2     | SRSF5    | ATP2B2   | EPB41   | AP2A2    | PPP3CB   | DOCK2    | UBR5     | ABL2     | RACGAP1 |
| PKP2       | ARNT2    | YAP1     | PTPN12  | SH3PXD2A | PARVA    | BMPR1A   | ROCK1    | KCNC1    | KEAP1   |
| MID1       | LDLR     | FOXE1    | PALLD   | NOTCH2   | SH2B3    | SMARCAD1 | ACTR1A   | NDUFS2   | GABBR1  |
| IGF2BP1    | GPS2     | BMP1     | CNTNAP1 | SNRNP200 | EXOC8    | MAP2K6   | EHD1     | ATG5     | EEF2    |
| TTC8       | DCTN2    | CLASP1   | TXNRD1  | YY1      | ARNTL    | TNC      | MGMT     | LRRC59   | ASPH    |
| ZW10       | NECAP2   | SNRPC    | FZD1    | SF3A3    | IKZF3    | USF1     | IGF2R    | ATXN3    | SNRPN   |
| SH3KBP1    | RYK      | PYHIN1   | BBS12   | TADA1    | DST      | FLOT1    | CCT3     | FAF2     | MRPS31  |
| NELL1      | NANOG    | RC3H1    | LONP1   | RICTOR   | PRC1     | CLU      | CCDC6    | SNAP23   | NOP56   |
| TPT1       | NEO1     | RABGAP1  | HELZ    | UPF1     | GABBR2   | PARD6A   | SEC23A   | RPS27A   | RPS6    |
| PRPF40A    | UVRAG    | DPP10    | NADK    | LOXL1    | PPP2CB   | NFYB     | POLD1    | PRPF3    | MAGOH   |
| ITPR3      | UGT1A6   | DSP      | ALB     | NUP214   | SGCG     | DBN1     | KSR1     | TRPC1    | LARS2   |
| PARD3      | FOXO3    | TRAF3    | STIL    | EEF1A1   | NRP1     | APIB1    | EPHB2    | RNF111   | MYBPC2  |
| HNRNPC     | RPL4     | ANAPC10  | EGLN2   | LDHA     | NELL2    | SUPT20H  | SGIP1    | USP22    | EPN1    |
| PPARGC1B   | KCNE2    | PPP2R2C  | MYO10   | HDAC8    | PDE4B    | BUB1     | LIMK2    | MYBL2    | ECM1    |
| KCNJ4      | ERBB3    | RAD23A   | BBS10   | BMX      | MARK2    | GRM5     | PRKCH    | MAP2K4   | ANAPC7  |
| MMP2       | FZR1     | MAP2K5   | TCP1    | LMO4     | HOMER2   | MAD2L1   | PTPN1    | RBBP7    | HADHB   |
| AURKB      | TGFB1    | PLCE1    | TFAP2C  | RBL1     | HK1      | PCDH15   | SASS6    | MYBPC1   | CACNB4  |
| FSCN1      | FAM161A  | SSRP1    | UGT1A10 | ACLY     | MDC1     | CLUAP1   | CAMK4    | MYL2     | ADCY2   |
| NR1I3      | KCNQ1    | SUV39H1  | RAPGEF2 | CCKBR    | ATF1     | SART1    | SMAD5    | CSN1S1   | MSX2    |
| SNAPIN     | LRRC4    | BAIAP2   | EML1    | HOOK2    | CHRM3    | ACAN     | COPS6    | MYLK     | PSAT1   |
| GOLM1      | SLC25A5  | CDC42BPA | AP3B1   | ARHGEF2  | NR0B2    | SPTA1    | SPAG5    | CCT6A    | TNNT1   |
| INA        | UGT1A4   | NLGN2    | SRI     | WASL     | AHNAK    | VWA8     | DGKI     | GRB14    | CEP97   |
| CSGALNACT2 | CRIP1    | HIRA     | HLA-B   | RAB7A    | SF3B3    | NEDD9    | EFTUD2   | COL8A2   | KIFC3   |
| CHSY3      | HERC2    | TPX2     | TERF2IP | ACVR1    | FBF1     | TRPC4    | MAGI3    | LAMC1    | CNOT1   |
| LTBP4      | CACNA1A  | COL5A1   | KCNF1   | RSL1D1   | TUBA1A   | NSMCE2   | PRPS1    | PARVB    | CEP70   |
| ACTG1      | KCNQ3    | PARP2    | PRPF8   | FERMT2   | CEP57    | USP8     | NDE1     | TIMP3    | TERF2   |
| TRPC6      | UGT1A3   | PFDN1    | PSMB4   | KIF1B    | COL13A1  | PTPRM    | SUPT7L   | PGK1     | ATN1    |
| KIF5B      | AUH      | CAPZB    | SNX5    | SYNE1    | COL4A4   | ATF3     | PAPSS1   | FEZ1     | JUND    |
| UGT1A9     | SLC25A12 | ORC3     | PHLPP1  | KIF1A    | RIPK1    | PTPN4    | ATAD3A   | WAS      | BCL6    |
| PRMT1      | PIH1D1   | NR4A2    | WFS1    | ITGAV    | ACTL6A   | MUTYH    | NLRP3    | CACNA2D1 | WRN     |
| APBB1      | MAPK8IP1 | RASAL2   | SIRT7   | SUPT3H   | DYNC1LI2 | GRIN3B   | GRIK1    | COL1A2   | ACTR2   |
| UGDH       | FES      | SGCZ     | CBX1    | HNRNPA0  | ATPIA1   | SNX2     | PTPRO    | WDR62    | TRAF2   |
| BUB1B      | RBMX     | SF3A1    | ZNF423  | CALD1    | KDM1A    | KAT6B    | COPS2    | CDT1     | TBK1    |
| UGT1A1     | RAPGEF4  | MED26    | RNF31   | TAF4     | CTNNA2   | STAT2    | CACNA1S  | SPRY2    | EFNB2   |
| MAPRE3     | FANCC    | PGD      | ZC3H15  | LPP      | FBLN5    | ERCC1    | COPB1    | FZD4     | GNB4    |

|           |           |           |         |         |          |          |           |         |          |
|-----------|-----------|-----------|---------|---------|----------|----------|-----------|---------|----------|
| OGT       | LINGO1    | APBB2     | RIMS2   | CNN1    | NEDD4L   | PAICS    | TUBB2A    | HIP1    | BBS9     |
| SND1      | TRIM21    | UBE2A     | SLC25A4 | SETDB1  | CLIP2    | DNAJB5   | SEC13     | TAF3    | NOTCH3   |
| PLCB3     | DDX6      | ASIC3     | HNRNPH1 | FBLN1   | UQCRB    | FRS2     | RPLP0     | COL4A6  | NUDT21   |
| CEP72     | FAM110B   | FKBP5     | CNKSR2  | TBXA2R  | IPO5     | TTF2     | FNDC3B    | HAUS6   | ZYX      |
| MYH7      | POLR2E    | KCNIP1    | AXIN1   | EIF4G1  | STK3     | GTF2F2   | RPS8      | LDHB    | PCOLCE   |
| TTLL5     | SNTG2     | ANKRD26   | SOX5    | LAMA1   | PLTP     | NDUFV1   | CKAP4     | NOTCH4  | ADD1     |
| CDK5RAP2  | PTPRS     | E2F6      | KLC1    | LAMP1   | KIF7     | SOD1     | CDC25A    | FBXW8   | AEBP2    |
| POLR2D    | OLFM2     | HTR2A     | HNRNPA3 | MDH2    | HSD17B10 | SF3B2    | KCNG4     | GTF2A1  | HAUS8    |
| RMND1     | CADM1     | ERCC4     | CDH9    | ATF6    | CBLN1    | C1QBP    | RAB27B    | U2AF2   | AKAP11   |
| MICAL3    | IRS4      | RAB11FIP2 | DNAH10  | CHEK1   | SLC25A11 | SLC25A3  | PACRG     | DNAJA1  | GATA4    |
| KCNQ2     | PTPRF     | ARHGEF1   | SMARCD3 | UBASH3B | TIMM44   | NDUFA9   | DMAP1     | RGS2    | DYNC1LI1 |
| COL4A5    | HTR1A     | SRRM1     | PSMD4   | TRIP4   | SDC2     | MRPS27   | STX8      | SUCLA2  | SUPT16H  |
| SMAD6     | SFXN1     | TRAF1     | FHL3    | ATG16L1 | NID1     | ARPC2    | PMS2      | PLXNA1  | MTTP     |
| RAB11FIP3 | PDCD6IP   | TDG       | PDHA1   | POU5F1  | CYP3A4   | PKD2     | SLC25A41  | NEGR1   | BRD8     |
| SH3GLB1   | EPHB1     | MED8      | NCKAP1  | GAD2    | LIN7B    | MYBPC3   | ALG13     | FGFR3   | ACVR2A   |
| HYOU1     | PPIB      | SH3GL1    | DYNC1H1 | ELMO2   | XRCC4    | MRPS9    | C7        | MED7    | KPNA2    |
| METTL3    | MAP4      | MAP2K7    | ANAPC4  | RPA4    | SLC1A1   | DES      | TNIP1     | PAXIP1  | FBXO5    |
| HOXA10    | AGO1      | PRDX5     | KPNA3   | KCNG3   | TRIM63   | SNAP91   | PDIA6     | COG6    | HSPA1L   |
| JPH3      | MED30     | BMPRI1B   | FOXP2   | UQCR1   | MAN2A1   | SKAP1    | EPHB3     | TADA3   | CAMSAP2  |
| PFDN6     | PSMD1     | RPL12     | TUBB8   | CBY1    | SYN1     | SCO1     | TUBA4A    | SCARA3  | SUCLG2   |
| PRKAA1    | TAF6      | ITPR2     | CHN1    | UBE2T   | SRPRB    | SOSTDC1  | KCNJ6     | SHC4    | CASP7    |
| CCDC8     | DRD4      | LIG4      | EIF3B   | CRMP1   | KLC3     | HAUS2    | CACNG2    | BCAN    | CREB5    |
| NR2F6     | CCT8      | MED14     | RAB27A  | MTMR2   | MBD2     | MTNR1A   | PSMD14    | RANBP2  | ANAPC2   |
| EIF3A     | L1CAM     | LAMB1     | G3BP1   | SNX6    | HGS      | SORBS2   | LRPPRC    | S100A6  | FOXN3    |
| LCP2      | OBSCN     | EPHA3     | DNAH14  | GLRB    | UQCR2    | PLOD1    | HAUS4     | POLA1   | UBE2E1   |
| JARID2    | IVNS1ABP  | SORT1     | LRFN1   | CCNT1   | PRKAA2   | ARIH1    | REST      | CD247   | SGCA     |
| HADHA     | MYBPH     | HK2       | AK2     | SKI     | POLR2C   | GRM8     | PSMB9     | RUVBL2  | PDIA3    |
| TRIM55    | RPH3AL    | PRRC2A    | ABCA1   | OMA1    | FOXG1    | SMC5     | VCAM1     | IFT57   | AHI1     |
| CEP164    | LAMC2     | RPN1      | ATRIP   | HABP2   | CUBN     | EIF4B    | TNNI1     | CENPE   | SRGAP3   |
| UNC13A    | CCT2      | STARD13   | BAZ1A   | ATP6V1A | SRGAP2   | UGT1A8   | NLGN3     | PBXIP1  | NUPR1    |
| E2F4      | ORC4      | LDLRAP1   | CCNA2   | BTC     | WDHD1    | PHF20    | ANAPC5    | TNR     | IRF9     |
| PDHB      | RPS24     | EPHA1     | IL1R2   | OPA1    | UBR1     | ITGB1BP2 | ARF1      | MTNR1B  | C6       |
| ASAP2     | MID2      | TNNI3     | PLAUR   | MRPL11  | ARPC4    | FBL      | MBD3      | FGL1    | FREM2    |
| LGALS3    | CTTNBP2NL | DERL1     | SNTG1   | CY5A    | SOD2     | PSMD11   | FZD7      | IRF1    | TAF6L    |
| SP100     | EHMT2     | ZC3HAV1   | GABRA5  | CKAP5   | TSNAX    | BSG      | PDLIM5    | KIF9    | SKAP2    |
| TAF9      | SF3A2     | MFAP4     | IL1RAP  | CHRM5   | GTF2I    | SPTB     | RAB11FIP4 | NAA15   | LOXL3    |
| LMO7      | KCTD16    | LATS1     | DEPDC1B | COL8A1  | PDE1B    | TGFA     | EPHA7     | ERG     | BCL2L14  |
| CDC14B    | STIP1     | POLE      | DCTN4   | SHROOM3 | NUP133   | FCGR2B   | EFNB1     | CBFA2T2 | TRIP10   |
| GPC1      | TAP1      | F13A1     | SCN5A   | SACMIL  | LDB2     | NEDD1    | PBX2      | HSPE1   | CNOT7    |
| HDAC11    | VMP1      | NUBPL     | SNTA1   | SAE1    | MED18    | TOMM20   | HLA-DRA   | RBM25   | CHCHD10  |
| SPOCK3    | GBE1      | ACTR3     | SNRPD3  | MYO1D   | RPE      | KIF2A    | APBB1IP   | DNMBP   | TTK      |
| EPHA5     | SCARB2    | MRPS21    | GOLGA5  | DDX17   | WEE1     | ABCD3    | STAMBIP   | NDUFA4  | XRN2     |
| NLK       | LAMB2     | FARSB     | TOMM22  | EPS15L1 | FRMD6    | SMG6     | UBE2E3    | NEXN    | SAP130   |

|          |         |          |          |         |         |          |           |          |         |
|----------|---------|----------|----------|---------|---------|----------|-----------|----------|---------|
| TUBGCP4  | BCAS3   | SATB2    | TPM4     | EFEMP2  | HTRA2   | MAFB     | PFKP      | MYH2     | EMD     |
| GRM2     | TIE1    | PFKFB3   | MAP2K3   | IRF3    | IKBKE   | LRPAP1   | FNBP1     | SGCD     | KDM5B   |
| ERRF11   | LAMA5   | PPP2R5D  | EPN2     | STK39   | EEF1G   | ETS2     | DNAJC7    | UBXN1    | GPC4    |
| VPS53    | DOCK7   | AKT3     | SOS2     | PIP5KL1 | BHLHE40 | PSME3    | MAP1B     | COX4I1   | VPS37C  |
| MCM7     | NPC1    | PSG1     | ID2      | LPIN3   | MED13L  | FLOT2    | RBFOX1    | PTPN21   | SPP1    |
| PMF1     | SPDL1   | MARK3    | KIF5C    | SKIL    | CPS1    | ARPC1B   | EIF4E2    | TFAP4    | SEMA4C  |
| PTPRU    | PGRMC1  | PPP1R12B | FGD4     | STX6    | GRIK3   | ITGB4    | PDE4A     | SNAI1    | DUSP10  |
| KY       | EFNA4   | PRMT3    | PTBP2    | TOPBP1  | FAM9B   | PPIE     | BMPER     | UBE2D1   | TADA2B  |
| PSMC6    | DOCK5   | ITGA2B   | COPG1    | EXO1    | KCNMB1  | ATP6V1B2 | DCP1A     | CASQ2    | RAB3B   |
| LAMP2    | JAM3    | FARP2    | EFNA3    | MAML3   | DDX39B  | CHMP4C   | GRK5      | GPC3     | WWC1    |
| ARHGAP21 | MCU     | MAN2A2   | NDUFS3   | AGR2    | XRCC1   | TAF5L    | PRKAB2    | SMAD7    | ARSG    |
| LRP6     | MYH8    | OPRM1    | DNAJC6   | DDX23   | MYOT    | FKBP8    | TNS4      | SYT5     | DENND1A |
| NTNG1    | SNRPD1  | ALOX5    | ASAP1    | CDKN2C  | NBEA    | CDKL5    | ZDHHC17   | BAZ1B    | PTPN14  |
| KCNV1    | PDE3A   | EIF3H    | ADORA1   | RPS6KB2 | RPS15   | HNRNPH2  | MAP3K7    | TUFM     | DHX30   |
| CHAF1A   | NOC2L   | KHDRBS3  | OGN      | SHROOM2 | TRPC5   | CNOT2    | ARF6      | KCNJ10   | CDCA8   |
| PCNT     | GRN     | PCCA     | ANAPC1   | IMMT    | RPL14   | PRDM16   | KRT40     | GRAP2    | RORC    |
| NPHP1    | PDZRN3  | SFN      | PDGFD    | SRA1    | PDE3B   | POLR2B   | KCNJ12    | ARHGEF12 | USH2A   |
| AKT2     | PSMA3   | TTR      | CEP19    | RPL28   | FEN1    | NGFR     | PCF11     | GALNT1   | UBE2D3  |
| THBS3    | TUBGCP2 | ZEB2     | SLC9A3R2 | PRIM1   | EFNA1   | SPTLC2   | STXBP3    | NFASC    | NRIP1   |
| MYOC     | PHLPP2  | MAP7D3   | SNAP29   | APC2    | NECAP1  | ASIC1    | COX6C     | C1QTNF2  | TRIM33  |
| MYO3A    | GLI1    | KCNA3    | PIN4     | SREBF1  | PPP2R2D | TRAF5    | DDX20     | PI4KA    | TEC     |
| RPS3     | MMP3    | CEP44    | SLX4     | RTF1    | SCAMP1  | GORASP2  | RB1CC1    | PRPF31   | COP55   |
| MGA      | GLI2    | COL14A1  | ADAMTS4  | KLC2    | CSNK1D  | USP7     | MAPK8IP2  | MITF     | PAN2    |
| SMO      | CREM    | DTNA     | KIF13A   | PGM5    | ZNF263  | PPP3CC   | CDC23     | THOC5    | ATIC    |
| ATP6V0A4 | RAP1GAP | SUMF1    | FLT4     | LAPTM4B | RANBP3  | STOM     | RAB11FIP5 | PCDHA10  | COG2    |
| HSPH1    | TMEM192 | AIFM1    | CRTC2    | ZFPL1   | RXF1P1  | LOXL2    | PRLR      | GPAA1    | MYH6    |
| ECSIT    | S1PR5   | CFHR1    | JKAMP    | KCNQ4   | NDUFA3  | EYS      | PSMD3     | KATNAL1  | PDP1    |
| ERLIN1   | ADAM12  | EIF4A1   | SNCAIP   | BAG3    | WDR6    | SNIP1    | SWAP70    | CPE      | DET1    |
| MRPS15   | RGS17   | GYPB     | SLC25A24 | TACC1   | SNX1    | SLC16A2  | GNG10     | SMARCC2  | MTCH1   |
| EIF4G3   | HCFC1   | TAP2     | ATP2B1   | SCN2A   | SYCE1   | NR1D2    | TEKT1     | NUP210   | TMEM205 |
| KLHL2    | GAD1    | CDH15    | FBX07    | SMCHD1  | TGFBR3  | RPL11    | RNF8      | SUSD4    | ADD3    |
| ITK      | EOGT    | LGALS3BP | CCNE1    | ABCB10  | SEMA3A  | RELB     | STC2      | SDCBP    | MEP1B   |
| NCAPG2   | PROS1   | SPTLC1   | VAMP8    | HSD11B1 | JAM2    | DRD1     | ACADVL    | RARG     | DGKZ    |
| COL7A1   | MAS1    | BMP7     | COLGALT2 | PCBP1   | ADAMTS2 | DPP6     | LMBR1L    | PCGF1    | PPFIA1  |
| AP1M1    | TXNDC12 | RPS6KA1  | CDCP1    | TPGS2   | TFDP2   | UCHL5    | GPR25     | ARHGAP10 | TMEM33  |
| SUDS3    | UMPS    | PXDN     | ADRA2A   | MYO15A  | CC2D2A  | PYGL     | DVL1      | WLS      | CYP1B1  |
| CLDN19   | IMMP1L  | COPB2    | GABRG1   | NAP1L4  | HAUS1   | GBP2     | SMOC2     | ACAD9    | GSPT2   |
| SYNM     | USP2    | AIM2     | POLDIP2  | AGTR1   | RABEP1  | LIMD1    | HNRNPR    | SEC22A   | RPL9    |
| TPR      | EYA2    | NBR1     | PDZD2    | ESRRB   | KNSTRN  | KDM4A    | FOXA2     | RPRD2    | EMC2    |
| USP10    | NCF2    | MAP4K4   | MATK     | CDYL    | IL17RC  | PTBP1    | RAB1A     | RASD1    | SDHC    |
| SNX21    | MAP2K2  | KHDRBS1  | AGAP1    | COG5    | MTA3    | YBX3     | LIPH      | ABCE1    | DOCK4   |
| C1QTNF9  | NDUFA8  | SPEN     | CLCA1    | AHCYL1  | NRG2    | RHO      | EMILIN2   | HR       | COPG2   |
| TRIM11   | CRX     | ELMO3    | UBXN2B   | DHX36   | SCN1B   | MARK1    | HCRTR1    | S1PR4    | SRP14   |

|          |         |           |          |         |          |          |          |           |          |
|----------|---------|-----------|----------|---------|----------|----------|----------|-----------|----------|
| HSPA9    | DNMT3B  | CALML5    | COL20A1  | RRBP1   | RCC2     | NETO2    | C8A      | RAB35     | NDUFS5   |
| PRKAB1   | SEC24C  | CAP1      | UBQLN2   | SCN4B   | DNAJC10  | TNS3     | POLE3    | IARS2     | MKNK1    |
| SRSF10   | LIMS1   | CCNB1     | BCAP31   | GNAZ    | SLC35A3  | OXCT1    | DNM1L    | PKNOX2    | EBF1     |
| GLB1L2   | COLEC12 | STK38     | LIN7C    | GABRA2  | GJB1     | KCNMB2   | KCNS3    | PES1      | PTGES3   |
| ITGA3    | CAMLG   | MTCH2     | PAX3     | LAMTOR2 | ZFYVE27  | AGK      | PCDHGB1  | KCNH2     | TACC2    |
| FBXO25   | TMEM237 | VPS52     | PKN2     | KIF22   | UBTF     | KLHL1    | CDH3     | SOCS6     | LEMD3    |
| NIPBL    | GPC6    | CDK7      | ATXN7L3  | PIK3C3  | OGG1     | NPAT     | OSMR     | PPP5C     | GAS7     |
| CALCOCO2 | SMARCD2 | DYNLT3    | UROD     | BECN1   | GART     | HNF4G    | ITGA2    | STARD7    | SORD     |
| INTS7    | SPATA13 | TREX1     | MRRF     | RBM3    | CD55     | TSC22D1  | DPYSL3   | SGCB      | GTF3C5   |
| TRIM54   | UHRF2   | DCUN1D1   | ABCC4    | GAS8    | RAB3IP   | KTN1     | DEGS1    | NCS1      | MEAF6    |
| SYT17    | GYG1    | ACO2      | NDUFAF2  | ST7     | LPCAT1   | WDR77    | WDFY3    | ATPAF1    | SKA3     |
| FBXL7    | POLK    | PRMT2     | CPT1A    | PCDHA3  | TUBGCP3  | TOM1L1   | AARS2    | ARC       | RBM45    |
| GMPPA    | SCLT1   | TXK       | QRFP     | MGST3   | SLC39A8  | PEX19    | TLE4     | PCK2      | TCF7     |
| COLEC11  | CCAR2   | USP4      | ZNF638   | NUP155  | RIT2     | SPATA18  | PPP1R15A | SPTBN4    | MYO1B    |
| PRDX6    | FOXC2   | SIN3B     | FOSB     | SPECC1L | TONSL    | NRP2     | CC2D1A   | NBEAL2    | RGS3     |
| U2SURP   | MYL12A  | GABARAPL1 | IGF2BP3  | RASSF1  | LTV1     | NAV2     | TULP1    | CACNA1H   | P4HA1    |
| IL17RD   | KLHL20  | VWF       | RGS14    | SRSF3   | KPNA1    | ABLM2    | JMJD1C   | GDPD5     | NEK9     |
| OPA3     | APOA1   | HSF1      | TAF13    | C8B     | CDA      | ACACA    | NAALADL2 | CYCS      | GLUL     |
| FAT1     | CERS2   | THEM4     | UBR3     | WNK1    | IL16     | NAGPA    | TMTC4    | MAB21L2   | NEK2     |
| MAPKAPK3 | PPA2    | ANKRD1    | RPL23    | HMOX1   | VGLL3    | LYST     | ARHGAP24 | MAPK8IP3  | MED12L   |
| KLF11    | PCDH20  | DAB1      | JAGN1    | GALNT11 | RGS16    | ARHGEF11 | PLCB4    | IFT20     | RTN4IP1  |
| SLC17A2  | ACSL3   | IPO7      | SERBP1   | STT3B   | SNRPB    | NXF1     | UBAC1    | DSE       | PKP3     |
| EIF2S3   | TH      | MUC4      | AIP      | POGZ    | RALY     | MECP2    | BABAM1   | RPN2      | TLK2     |
| SLC4A7   | AQR     | EDA       | HEY2     | MTMR6   | MYL9     | TMTC3    | MILR1    | PBRM1     | CTDP1    |
| ZDHHC9   | GOLGA7  | ACTL6B    | HSD17B12 | PINK1   | EHD4     | TNKS1BP1 | GABRA6   | LPXN      | CROCC    |
| CASR     | UNC93B1 | LBR       | RNF19A   | EEF1B2  | IMPDH2   | SPAG16   | CDH6     | HCRTR2    | PCDHGB4  |
| CYP2S1   | GET4    | THSD7A    | ITIH2    | COL4A1  | TNNT2    | AFF3     | ELP2     | FGB       | PTPRH    |
| SPRED1   | CTSD    | ADORA2A   | STK24    | ALPP    | CCP110   | PRMT6    | TK1      | TCF20     | KCNJ2    |
| NUP205   | DLX5    | G6PD      | GTF3C3   | UBXN2A  | ATP1B3   | ATP2B4   | MEN1     | PAX6      | KIRREL3  |
| SOX9     | TP53BP2 | SLC25A13  | STIM2    | PLS3    | HOXD13   | SRSF11   | GPRASP1  | IPO11     | MMS22L   |
| PTGS2    | DTL     | PLCB2     | HDGF     | TRAK1   | DKK3     | SLC2A12  | EPB42    | ENC1      | ARL4A    |
| FAM83D   | HSPA1B  | GABRG3    | TUBB4A   | NFIB    | SLC25A19 | TANK     | HNF1B    | SMG7      | TEAD4    |
| DCAF7    | FOXP4   | BCKDHA    | RBL2     | THOC2   | SLC7A5   | CCSAP    | SEMA5A   | BAG1      | MAP7     |
| NR5A2    | GJB7    | KALRN     | TSG101   | LINGO2  | S1PR2    | GTF3C4   | PITX2    | TSHB      | MICU1    |
| BAG5     | CSTF3   | COCH      | TRIM32   | ERAP1   | SS18L1   | APLP2    | EXTL3    | ROCK2     | RBFOX2   |
| NUP153   | P4HB    | GNAT3     | PPP1R9B  | WIPF1   | RNF123   | ITGA6    | FBXO45   | SORL1     | CHD1L    |
| COPA     | MXI1    | ARPC5     | SLC9A3   | NEK7    | AIMP1    | PCBD1    | VTI1A    | NAP1L1    | RALA     |
| RAB14    | STXBP2  | KCNC2     | CAPRIN1  | TTC3    | ORC1     | SDC4     | TLN2     | CSTF2     | CEACAM21 |
| COMMD1   | LIG3    | MYH7B     | BDNF     | ADCY3   | DRD3     | XPO6     | MOV10    | SOCS3     | PIK3C2B  |
| LMX1B    | MYRIP   | KCNA1     | MED6     | CCDC88A | RGS4     | GNB3     | NDRG1    | LAP3      | ANKRD2   |
| EPB41L2  | CSDE1   | RPAP2     | CENPF    | ATP2A3  | RPL31    | EID3     | STAT4    | KIDINS220 | CRBN     |
| NQO2     | CLEC11A | LDB3      | PELI1    | FGG     | NOP2     | CPSF3    | KMT2E    | UCHL1     | FARP1    |
| PRMT5    | CLIP1   | EDEM3     | RGS1     | LRIG1   | KIF3C    | DYRK2    | COX5B    | GCDH      | SETD7    |

|         |        |         |         |         |         |         |         |          |        |
|---------|--------|---------|---------|---------|---------|---------|---------|----------|--------|
| COL2A1  | TAF15  | ANKS1A  | JAKMIP2 | CD28    | SLAIN2  | GORASP1 | PCSK2   | FOXMI    | RPL7A  |
| TAF7    | RG55   | MSH5    | BRD2    | NCSTN   | CLCN3   | GCC2    | HAUS5   | FLOD2    | TRIM23 |
| MZT2B   | PEBP1  | IL31RA  | MYOF    | KRT9    | DDX42   | TPCN2   | OTC     | EIF4EBP1 | MED11  |
| PPP1R9A | WIP2   | ADRA1B  | CKMT1A  | POC1A   | EPN3    | ZFPM2   | TOMM40  | MZT1     | BAG6   |
| PTPN3   | PHF1   | OLFM3   | PIK3C2A | B3GAT3  | LGALS8  | RAB8A   | RPS4X   | NTNG2    | EHBP1  |
| TTBK1   | PNKP   | CCHCR1  | FSTL1   | PA2G4   | PKN3    | FKBP4   | BRPF3   | C1D      | ANTXR2 |
| CDH10   | ARF5   | CCNC    | MYH14   | BCHE    | HGF     | MED20   | PPP2R5A | MYO1E    | IL17A  |
| COX5A   | CREB3  | RGS20   | GIT1    | C3orf52 | PARK7   | POLR1C  | AP4M1   | DNALI1   | RBM10  |
| TRAK2   | LAMA3  | F11R    | PRPF19  | ANKRA2  | SYT6    | SYNJ2BP | NR5A1   | GPR161   | GSS    |
| DYNLRB1 | WASF2  | RAC2    | FOXD3   | IQGAP2  | DHCR24  | TUBG2   | REV1    | ADCY1    | CDC6   |
| SEC62   | DYNLT1 | LCA5    | HMG20A  | CTPS2   | KCTD3   | MICU2   | SH2B2   | PLEKHF2  | ATP4A  |
| TRADD   | S1PR1  | CHD7    | SUFU    | IL20RA  | FOXK2   | APPBP2  | JPH1    | CUL4B    | EIF3L  |
| TDRD7   | CD79B  | CLTA    | SPARC   | INCA1   | DNAJC5  | RANBP9  | UBR2    | ALDH3A2  | MED10  |
| DIAPH1  | SV2A   | USP19   | TRIP6   | NAT10   | RGS10   | RABGEF1 | TCOF1   | RAB3C    | ZFP36  |
| VPS18   | TIMM50 | ABCA3   | NTN4    | GRK6    | USO1    | RPL37A  | WDR26   | RPL7     | CEP95  |
| PCDHGC3 | STX7   | METTL14 | HOXC8   | ELOVL5  | SLC6A3  | CD244   | STAM2   | TNNI2    | MAPK11 |
| RGMB    | LMNB2  | CUL4A   | FAM110A | SKA1    | CRTAC1  | SSTR2   | DEK     | SORBS3   | NRBF2  |
| LRRCC1  | RECQL4 | MTF2    | THRAP3  | ITGA8   | ANKRD46 | CAMSAP3 | MED21   | TRIP11   | LEPR   |
| CIAO1   | DNAJB6 | SRSF7   | ATF6B   | NUP54   | EXOC5   |         |         |          |        |

**Supplementary Table 4. Candidate AML genes present in all AML patients**

|          |         |         |         |        |         |         |          |         |         |
|----------|---------|---------|---------|--------|---------|---------|----------|---------|---------|
| MATN2    | SMC3    | UBC     | PRKACA  | FOXO1  | BSN     | FER     | DCC      | CEP120  | EIF4E   |
| KRT8     | CASK    | PRKD1   | TNKS2   | DYRK1A | EPB41L3 | PRKCE   | PPP2R2B  | KAT2B   | SMAD2   |
| NRG1     | RARB    | VTN     | RPS6KA2 | CTNND2 | LARP7   | NFATC2  | TNK2     | CUL3    | ANK2    |
| HNRNPM   | PDPK1   | AKAP12  | ELN     | HNRNPU | KAT5    | NTRK2   | FAF1     | SNW1    | TANC1   |
| SHANK1   | TRPC3   | CGN     | MAP3K5  | PRKG1  | E2F3    | KHDRBS2 | HCK      | STAT1   | AMOT    |
| BICD1    | GSN     | CTBP1   | EXOC1   | SF1    | PXN     | ITPR1   | SMAD3    | SMARCE1 | SHC1    |
| DYNC11I1 | MCM3    | POR     | SPTAN1  | ANK1   | IFT74   | SMARCC1 | GRIN2B   | ALMS1   | POU2F1  |
| HIPK2    | CAMK2D  | TP63    | SNX9    | KCNIP4 | PDE4D   | MAPK10  | AP2M1    | YWHAG   | RG57    |
| CDC16    | ACTN4   | EZR     | SREBF2  | ESRRA  | IQGAP1  | ACTA1   | FLNC     | CDC5L   | KCND2   |
| MYO6     | AP2S1   | DLGAP2  | CD2AP   | ANXA7  | THRA    | SUMO1   | ITGB5    | NCOR2   | MEF2A   |
| HDAC6    | RTN4    | KCNB2   | HNRNPD  | NUDC   | RBPJ    | XRCC6   | TSHR     | PLA2G4A | PPM1A   |
| GAN      | TNKS    | NTM     | ATXN1   | FBN1   | TEAD2   | MEF2C   | DNM3     | DAB2    | DAG1    |
| SIRT6    | CHCHD3  | DLGAP3  | GRB2    | HOMER1 | PRKDC   | SMAD1   | RPA1     | PTPRA   | DTNBP1  |
| HDAC7    | CDC25C  | PRKAR1A | ECT2    | PTK2   | DLG1    | AMPH    | PABPC1   | AP2B1   | CEP128  |
| LATS2    | KIF13B  | PTPRB   | MET     | FYN    | FOXJ2   | S100A10 | GRB10    | CPSF6   | HNRNPA1 |
| NIN      | CAMK2B  | MYH9    | TUBA1B  | LYN    | YWHAH   | CARM1   | PTPRK    | EXOC2   | PLEKHA7 |
| MMP10    | FAM20C  | PTBP3   | NCOA2   | CALM3  | CCT7    | ADRB2   | GRID2    | PSEN1   | GNA12   |
| HDAC5    | SMARCA4 | LEF1    | ETS1    | PHGDH  | TGFBR2  | IMMP2L  | KIAA0753 | ACTA2   | XRCC5   |
| TYK2     | SP1     | TAB2    | LMNA    | VAV3   | FBN2    | SGK1    | GAK      | NME7    | FLNA    |
| EPHA4    | NCOR1   | PPP3CA  | PPP1CB  | EGLN3  | SUMO2   | NCOA3   | RPA2     | MAPKAP1 | GJA1    |
| GRM1     | MACF1   | KCNB1   | GRIK2   | TUBA1C | GNA13   | CACNA1D | HMGB1    | DLG2    | ESR1    |



|         |         |        |        |          |        |          |         |         |         |
|---------|---------|--------|--------|----------|--------|----------|---------|---------|---------|
| FBXW11  | PRKAR2A | DISC1  | TLN1   | NEDD4    | CEP170 | CHUK     | PDGFRA  | NR2C2   | RNF41   |
| VDAC1   | BTRC    | ANK3   | PLCG2  | HDAC1    | GAB1   | CNTRL    | SQSTM1  | OPTN    | ACTN1   |
| CEP290  | VCP     | CDC20  | EPHA2  | BCAR1    | YBX1   | GRM7     | CDK9    | PHLDB2  | CSNK1A1 |
| ROBO1   | TPM3    | TNIK   | NLGN1  | AURKA    | GNAO1  | PRKCZ    | BARD1   | YWHAB   | AKAP5   |
| BLM     | MLH1    | MED13  | PICK1  | SH3GL3   | DOCK1  | MAPT     | UBXN7   | GRIK4   | PPP2R1A |
| GRIA2   | IRS1    | PTPRR  | APPL1  | PRKCA    | PTPRJ  | ODF2     | PRKACB  | MED23   | POU6F2  |
| ARNT    | COIL    | DLC1   | NINL   | MAPK9    | PCM1   | EXOC6    | CDC14A  | SRPK2   | NRXN1   |
| ARRB1   | ESR2    | FUS    | HMGA1  | MYO19    | TRAF6  | RAD50    | PPARD   | YWHAZ   | MTOR    |
| MAD1L1  | CEP135  | HNRNPF | CUL1   | ITSN1    | EXOC4  | LSAMP    | KIF20A  | NEB     | RPS6KA3 |
| MAGI1   | MSN     | BBS7   | MED4   | TUBB     | NKX2-1 | TERF1    | ENO1    | MAX     | HTT     |
| PPP3R1  | WWTR1   | CTNND1 | ATR    | PRKCI    | RNF2   | RXRG     | STAU1   | DHX15   | PAK2    |
| GNAI2   | YES1    | ACTN2  | PLCG1  | PIK3R3   | AFAP1  | ANLN     | ROBO2   | GRM3    | PIBF1   |
| CSNK2A1 | TBP     | MAML1  | GNAI3  | LRP2     | EIF3E  | TRAF3IP1 | MAP3K3  | CNTN1   | ITGB1   |
| VAV1    | RELA    | GRIK5  | PTPRZ1 | NR2F1    | EXOC7  | ABI2     | RYR2    | PPP2R5C | HDAC3   |
| CAMK2G  | TUBB3   | TJP1   | RPA3   | PAFAH1B1 | GRIA1  | IKBKB    | PRKAR2B | RBBP4   | DLG3    |
| PTPRG   | LIMA1   | PPARA  | ACTB   | SPTBN1   | DNM1   | RYR1     | ABI1    | TNS1    | PPM1G   |
| HSP90B1 | SVIL    | RHOA   | CAMK2A | HSP90AB1 | ERC1   | KCNA2    | SIRT1   | SPICE1  | PAK1    |
| HOOK1   | CCT4    | TRIM28 | THRB   | RANGAP1  | CENPJ  | AHR      | IGFBP5  | TRIM24  | GNAQ    |
| CDH5    | CSNK2A2 | MAGI2  | PLK1   | DDX5     | TSC2   |          |         |         |         |

**Supplementary Table 5.** Candidate AML genes present in known AML gene modules for AML patient

**Sample 018**

| Candidate AML genes | Known AML genes<br>(of which the module includes candidate AML genes) | ALL the AML genes involved in current module | Sample-ID |
|---------------------|-----------------------------------------------------------------------|----------------------------------------------|-----------|
| ESR1                | ACTBL2                                                                | ACTBL2,ESR1,NFKB1                            | 18        |
| ESR1                | APEX1                                                                 | APEX1,EGFR,ESR1,NPM1                         | 18        |
| ESR1                | ARID1B                                                                | ARID1B,ESR1                                  | 18        |
| ESR1                | ASXL1                                                                 | ASXL1,ESR1,KMT2C                             | 18        |
| ESR1                | BCL3                                                                  | BCL3,ESR1,TBL1XR1                            | 18        |
| ESR1                | BCOR                                                                  | BCOR,CREBBP,ESR1,FOS                         | 18        |
| ESR1                | BLNK                                                                  | BLNK,EGFR,ERBB4,ESR1,KIT,PDGFRB              | 18        |
| ESR1                | C2                                                                    | C2,ESR1                                      | 18        |
| ESR1                | CAD                                                                   | CAD,CDK4,CREBBP,ESR1,RARA                    | 18        |
| ESR1                | CCND1                                                                 | CCND1,EGFR,ESR1,PPARG                        | 18        |
| ESR1                | CD6                                                                   | CD6,ESR1                                     | 18        |
| ESR1                | CDH1                                                                  | CDH1,CTNNB1,EGFR,ESR1,JUP                    | 18        |
| ESR1                | CDK4                                                                  | CDK4,CREBBP,ESR1,FOS,RARA                    | 18        |
| ESR1                | CHD2                                                                  | CHD2,ESR1,SMC1A                              | 18        |
| ESR1                | CNTN2                                                                 | CNTN2,ESR1,NCAM1,PTEN                        | 18        |
| ESR1                | CREBBP                                                                | CREBBP,ESR1,RPL5                             | 18        |

|      |          |                                 |    |
|------|----------|---------------------------------|----|
| ESR1 | CTNNB1   | CDH1,CTNNB1,ERBB4,ESR1,JUP,PTEN | 18 |
| ESR1 | DIO3     | DIO3,ESR1,GNAI1                 | 18 |
| ESR1 | E2F1     | E2F1,ESR1                       | 18 |
| ESR1 | ECT2L    | ESR1,NFKB1                      | 18 |
| ESR1 | EED      | EED,ESR1                        | 18 |
| ESR1 | EGFR     | CDH1,CTNNB1,EGFR,ESR1,JUP       | 18 |
| ESR1 | EPM2A    | CTNNB1,EPM2A,ESR1,FN1           | 18 |
| ESR1 | ERBB4    | CTNNB1,ERBB4,ESR1,PTEN          | 18 |
| ESR1 | ETV6     | ESR1,ETV6                       | 18 |
| ESR1 | FN1      | ESR1,FN1                        | 18 |
| ESR1 | FOS      | ESR1,FOS                        | 18 |
| ESR1 | FUBP1    | ESR1,FN1,FUBP1                  | 18 |
| ESR1 | GAPDH    | EGFR,ESR1,GAPDH,RPL5,SET        | 18 |
| ESR1 | GC       | ERBB4,ESR1,GC                   | 18 |
| ESR1 | GNAI1    | ESR1,FOS,GNAI1                  | 18 |
| ESR1 | HBA2     | EGFR,ESR1,HBA2,HBB              | 18 |
| ESR1 | HBB      | ESR1,HBA2,HBB                   | 18 |
| ESR1 | HIF1A    | ESR1,GAPDH,HIF1A,RPL5           | 18 |
| ESR1 | HLA-G    | ESR1,HLA-G                      | 18 |
| ESR1 | HNF4A    | ESR1,HNF4A,MAPK14,PPARGC1A,SFPQ | 18 |
| ESR1 | HPS4     | ESR1,HPS4                       | 18 |
| ESR1 | HSPA4    | ESR1,HSPA4                      | 18 |
| ESR1 | HSPA4L   | ESR1,HSPA4L                     | 18 |
| ESR1 | HSPA5    | ESR1,HSPA5,RPL5                 | 18 |
| ESR1 | JUNB     | ESR1,FOS,JUNB,MAPK14            | 18 |
| ESR1 | JUP      | CDH1,CTNNB1,EGFR,ESR1,JUP       | 18 |
| ESR1 | KDM6A    | ESR1,KDM6A,KMT2C,MAPK14,NCOA6   | 18 |
| ESR1 | KIT      | EGFR,ERBB4,ESR1,KIT,PDGFRB      | 18 |
| ESR1 | KMT2C    | ESR1,KDM6A,KMT2C,MAPK14,NCOA6   | 18 |
| ESR1 | MAGED2   | ESR1,MAGED2,PTEN                | 18 |
| ESR1 | MAP4K1   | EGFR,ERBB4,ESR1,MAP4K1,SLC3A1   | 18 |
| ESR1 | MAPK14   | ESR1,HSPA5,MAPK14               | 18 |
| ESR1 | MAPKAPK2 | ESR1,MAPK14,MAPKAPK2            | 18 |
| ESR1 | MNDA     | ESR1,MNDA,SET                   | 18 |
| ESR1 | MPL      | EGFR,ESR1,MPL,PDGFRB            | 18 |
| ESR1 | MSH6     | ESR1,MSH6                       | 18 |
| ESR1 | MUC1     | ERBB4,ESR1,MUC1                 | 18 |
| ESR1 | MVP      | ESR1,MVP,PTEN                   | 18 |
| ESR1 | MYO1G    | ESR1,GNAI1,MYO1G                | 18 |
| ESR1 | NCAM1    | CNTN2,EGFR,ESR1,NCAM1,SDC1      | 18 |
| ESR1 | NCOA6    | ESR1,KMT2C,NCOA6,PPARG          | 18 |
| ESR1 | NFKB1    | ESR1,HNF4A,NFKB1,PPARG          | 18 |
| ESR1 | NME2     | ERBB4,ESR1,NME2,TBL1XR1         | 18 |

|      |          |                              |    |
|------|----------|------------------------------|----|
| ESR1 | NOS3     | ESR1,NOS3                    | 18 |
| ESR1 | NPM1     | EGFR,ESR1,NPM1,TRRAP         | 18 |
| ESR1 | PDGFRB   | EGFR,ERBB4,ESR1,KIT,PDGFRB   | 18 |
| ESR1 | PGR      | ESR1,GNAI1,PGR,PTEN          | 18 |
| ESR1 | PHB2     | ESR1,GAPDH,PHB2,SET          | 18 |
| ESR1 | PIK3CA   | ESR1,PDGFRB,PIK3CA           | 18 |
| ESR1 | PKIA     | ESR1,PKIA                    | 18 |
| ESR1 | PPARG    | EGFR,ESR1,NFKB1,PPARG        | 18 |
| ESR1 | PPARGC1A | ESR1,PPARGC1A,RARA,TBL1XR1   | 18 |
| ESR1 | PPP2R3A  | EGFR,ESR1,PPP2R3A            | 18 |
| ESR1 | PSIP1    | ESR1,FOS,PSIP1               | 18 |
| ESR1 | PSMC3    | E2F1,ESR1,PSMC3              | 18 |
| ESR1 | PTEN     | CTNNB1,ERBB4,ESR1,GNAI1,PTEN | 18 |
| ESR1 | PTPRT    | EGFR,ERBB4,ESR1,PTPRT,SLC3A1 | 18 |
| ESR1 | RAD21    | ESR1,RAD21                   | 18 |
| ESR1 | RAG2     | ESR1,RAG2                    | 18 |
| ESR1 | RARA     | ESR1,PPARGC1A,RARA,TBL1XR1   | 18 |
| ESR1 | RB1      | ESR1,PSMC3,RB1               | 18 |
| ESR1 | ROS1     | CTNNB1,ESR1,ROS1             | 18 |
| ESR1 | RPL19    | ESR1,RPL19                   | 18 |
| ESR1 | RPL5     | ESR1,RPL5                    | 18 |
| ESR1 | SDC1     | ERBB4,ESR1,SDC1              | 18 |
| ESR1 | SET      | CTNNB1,ESR1,RPL5,SET         | 18 |
| ESR1 | SFPQ     | CREBBP,E2F1,ESR1,SFPQ        | 18 |
| ESR1 | SKP1     | ESR1,GAPDH,SET,SKP1          | 18 |
| ESR1 | SLC3A1   | EGFR,ERBB4,ESR1,SLC3A1       | 18 |
| ESR1 | SMC1A    | EGFR,ESR1,SMC1A              | 18 |
| ESR1 | SNRPE    | ESR1,FN1,HSPA4,SNRPE         | 18 |
| ESR1 | STAG2    | ESR1,RAD21,SMC1A,STAG2       | 18 |
| ESR1 | STAT5A   | ERBB4,ESR1,STAT5A            | 18 |
| ESR1 | TBL1XR1  | ESR1,PPARGC1A,RARA,TBL1XR1   | 18 |
| ESR1 | TOP2B    | ESR1,TOP2B                   | 18 |
| ESR1 | TRRAP    | ESR1,TRRAP                   | 18 |
| ESR1 | VDR      | ESR1,PPARG,VDR               | 18 |
| ESR1 | XBP1     | ESR1,HSPA5,MAPK14,XBP1       | 18 |
| ESR1 | ZMYM3    | ESR1,ZMYM3                   | 18 |
| FYN  | ABCG2    | ABCG2,FYN                    | 18 |
| FYN  | ABL1     | ABL1,DNM2,EP300,FYN          | 18 |
| FYN  | ANPEP    | ANPEP,CD36,FYN               | 18 |
| FYN  | BCR      | BCR,DOK1,FYN,KDR             | 18 |
| FYN  | C5       | C5,F2,FYN                    | 18 |
| FYN  | CARD11   | CARD11,FYN,ZAP70             | 18 |
| FYN  | CCND2    | CCND2,FYN                    | 18 |

|     |          |                                      |    |
|-----|----------|--------------------------------------|----|
| FYN | CD14     | CD14,FYN,LCK                         | 18 |
| FYN | CD19     | CD19,FYN                             | 18 |
| FYN | CD2      | CD2,CD58,FCGR3A,FYN,PTPRC            | 18 |
| FYN | CD36     | ANPEP,CD36,FYN                       | 18 |
| FYN | CD5      | CD2,CD5,CD58,CD6,FYN,LCK,PTPRC,ZAP70 | 18 |
| FYN | CD58     | CD2,CD5,CD58,FYN,LCK,PTPRC           | 18 |
| FYN | CD6      | CD5,CD6,FYN                          | 18 |
| FYN | CD86     | CD86,CTLA4,FYN,LCK                   | 18 |
| FYN | CSF1R    | CSF1R,FYN                            | 18 |
| FYN | CSF2RB   | BCR,CSF2RB,FYN,KIT                   | 18 |
| FYN | CTLA4    | CD86,CTLA4,FYN                       | 18 |
| FYN | DLX4     | ABL1,DLX4,FYN                        | 18 |
| FYN | DNM2     | DNM2,FYN                             | 18 |
| FYN | DOK1     | DOK1,FYN,KDR                         | 18 |
| FYN | DOK2     | DOK2,FYN                             | 18 |
| FYN | EP300    | DNM2,EP300,FYN                       | 18 |
| FYN | EPM2A    | EPM2A,FYN                            | 18 |
| FYN | F2       | C5,F2,FYN                            | 18 |
| FYN | FAS      | FAS,FYN,LCK                          | 18 |
| FYN | FCGR3A   | CD2,FCGR3A,FYN,PTPRC                 | 18 |
| FYN | FGFR2    | FGFR2,FYN                            | 18 |
| FYN | FLT1     | FLT1,FYN,KDR                         | 18 |
| FYN | FLT3     | FLT3,FYN                             | 18 |
| FYN | GC       | FYN,GC                               | 18 |
| FYN | GUCY2D   | FYN,GUCY2D                           | 18 |
| FYN | HSP90AA1 | FYN,HSP90AA1                         | 18 |
| FYN | HSPA8    | FYN,HSPA8                            | 18 |
| FYN | ICOS     | FYN,ICOS                             | 18 |
| FYN | IFNAR1   | CD2,FCGR3A,FYN,IFNAR1,PTPRC,ZAP70    | 18 |
| FYN | IL18R1   | CD2,FYN,IL18R1,KIT,LCK               | 18 |
| FYN | IL2RB    | FYN,IL2RB,LCK                        | 18 |
| FYN | IL7      | FYN,IL7,IL7R                         | 18 |
| FYN | IL7R     | FYN,IL7,IL7R                         | 18 |
| FYN | ITGB2    | FYN,ITGB2                            | 18 |
| FYN | KDR      | BCR,FYN,KDR                          | 18 |
| FYN | KIT      | FYN,KIT                              | 18 |
| FYN | LCK      | FYN,LCK                              | 18 |
| FYN | MAP4K1   | FYN,MAP4K1                           | 18 |
| FYN | MAT2A    | FYN,MAT2A                            | 18 |
| FYN | MKI67    | DNM2,EP300,FYN,MKI67                 | 18 |
| FYN | MPL      | FYN,MPL,PTPRC                        | 18 |
| FYN | MS4A1    | FYN,HSPA8,MS4A1,ZAP70                | 18 |
| FYN | MYD88    | FYN,MYD88                            | 18 |

|     |         |                                   |    |
|-----|---------|-----------------------------------|----|
| FYN | NCAM1   | FYN,NCAM1                         | 18 |
| FYN | PIM1    | ABL1,FYN,HSP90AA1,PIM1            | 18 |
| FYN | PRDX2   | FYN,PRDX2                         | 18 |
| FYN | PTPRC   | FYN,LCK,PTPRC                     | 18 |
| FYN | RAPGEF1 | FYN,RAPGEF1                       | 18 |
| FYN | SPN     | FYN,SPN                           | 18 |
| FYN | THY1    | CSF1R,FYN,LCK,THY1                | 18 |
| FYN | ZAP70   | FYN,ZAP70                         | 18 |
| FYN | ZMYM3   | FYN,ZMYM3                         | 18 |
| LYN | ANGPT1  | ANGPT1,ANGPT2,LYN,PTPRC           | 18 |
| LYN | ANGPT2  | ANGPT1,ANGPT2,LYN                 | 18 |
| LYN | BTK     | BTK,JAK1,LYN                      | 18 |
| LYN | CASP9   | CASP9,LYN                         | 18 |
| LYN | CD19    | CD19,CD72,FCER2,LYN               | 18 |
| LYN | CD22    | CD22,INPP5D,LYN,PTPRC             | 18 |
| LYN | CD36    | CD36,CD9,LYN                      | 18 |
| LYN | CD68    | CD68,LYN,MUC1                     | 18 |
| LYN | CD72    | CD72,LYN                          | 18 |
| LYN | CD86    | CD86,CTLA4,LCK,LYN,PIK3CA         | 18 |
| LYN | CD9     | CD36,CD9,LYN                      | 18 |
| LYN | CSF2RB  | CSF2RB,INPP5D,JAK1,KIT,LYN        | 18 |
| LYN | CSF3    | CSF3,JAK1,LYN                     | 18 |
| LYN | CTLA4   | CD86,CTLA4,GP1BA,LYN,POU2F2       | 18 |
| LYN | DOK1    | DOK1,LYN,PIK3CA                   | 18 |
| LYN | DOK2    | DOK2,INPP5D,JAK1,LYN              | 18 |
| LYN | EWSR1   | EWSR1,LYN                         | 18 |
| LYN | FAT4    | FAT4,LYN                          | 18 |
| LYN | FCER2   | CD19,FCER2,ITGB2,LYN              | 18 |
| LYN | FCGR3A  | CD22,FCGR3A,LYN,PTPRC             | 18 |
| LYN | FGFR2   | FGFR2,LYN,PTK2B                   | 18 |
| LYN | FGR     | FGR,LYN                           | 18 |
| LYN | FLT3    | FLT3,LYN                          | 18 |
| LYN | GP1BA   | GP1BA,LYN                         | 18 |
| LYN | IFNAR1  | CD22,FCGR3A,IFNAR1,JAK1,LYN,PTPRC | 18 |
| LYN | IL1B    | IL1B,LYN,TNFRSF10B                | 18 |
| LYN | IL2RB   | IL2RB,INPP5D,JAK1,LCK,LYN         | 18 |
| LYN | IL5RA   | CSF2RB,IL5RA,JAK1,LYN             | 18 |
| LYN | IL6ST   | IL6ST,JAK1,LIFR,LYN               | 18 |
| LYN | IL7     | IL7,IL7R,JAK1,LYN,PTK2B           | 18 |
| LYN | IL7R    | IL7,IL7R,JAK1,LYN                 | 18 |
| LYN | INPP5D  | DOK2,INPP5D,JAK1,LYN              | 18 |
| LYN | ITGAX   | FCER2,ITGAX,ITGB2,LYN,PTK2B       | 18 |
| LYN | ITGB2   | ITGB2,LYN,PTK2B                   | 18 |

|      |           |                             |    |
|------|-----------|-----------------------------|----|
| LYN  | JAK1      | INPP5D,JAK1,LCK,LYN,PIK3CA  | 18 |
| LYN  | KIT       | KIT,LYN                     | 18 |
| LYN  | LCK       | LCK,LYN                     | 18 |
| LYN  | LIF       | IL6ST,LIF,LIFR,LYN          | 18 |
| LYN  | LIFR      | IL6ST,LIFR,LYN              | 18 |
| LYN  | MME       | CD36,LYN,MME                | 18 |
| LYN  | MPL       | LYN,MPL,PTK2B,PTPRC         | 18 |
| LYN  | MS4A1     | LYN,MS4A1                   | 18 |
| LYN  | MUC1      | LYN,MUC1                    | 18 |
| LYN  | MYD88     | JAK1,LYN,MYD88,PTK2B        | 18 |
| LYN  | PBX1      | LYN,PBX1                    | 18 |
| LYN  | PIK3CA    | INPP5D,JAK1,LCK,LYN,PIK3CA  | 18 |
| LYN  | POU2F2    | LYN,PBX1,POU2F2             | 18 |
| LYN  | PRKCQ     | LYN,PRKCQ                   | 18 |
| LYN  | PTK2B     | JAK1,LYN,PTK2B              | 18 |
| LYN  | PTPRC     | JAK1,LCK,LYN,PTPRC          | 18 |
| LYN  | RPL10     | LYN,RPL10                   | 18 |
| LYN  | TNFRSF10B | IL1B,LYN,MYD88,TNFRSF10B    | 18 |
| FAF1 | ABCB1     | ABCB1,FAF1,FAS              | 18 |
| FAF1 | AKT1      | AKT1,FAF1,HSP90AA1          | 18 |
| FAF1 | ANGPT2    | ANGPT2,CDKN1A,FAF1          | 18 |
| FAF1 | ATP2A2    | ATP2A2,CA2,FAF1             | 18 |
| FAF1 | CA2       | ATP2A2,CA2,FAF1,HSPA5,HSPD1 | 18 |
| FAF1 | CASP8     | CASP8,FAF1,FAS,PARP1,RPL5   | 18 |
| FAF1 | CD40      | CD40,FAF1,HSPA4,HSPA8,IL4R  | 18 |
| FAF1 | CD74      | CD74,FAF1                   | 18 |
| FAF1 | CDKN1A    | CDKN1A,FAF1                 | 18 |
| FAF1 | CEACAM6   | CEACAM6,FAF1,HSPD1          | 18 |
| FAF1 | CREBBP    | CREBBP,FAF1,RPL5            | 18 |
| FAF1 | CSF1R     | CSF1R,FAF1                  | 18 |
| FAF1 | DAZL      | DAZL,FAF1                   | 18 |
| FAF1 | DNTT      | DNTT,FAF1                   | 18 |
| FAF1 | FAS       | CASP8,FAF1,FAS,HSPA5        | 18 |
| FAF1 | GAPDH     | FAF1,FAS,GAPDH,RPL5,SET     | 18 |
| FAF1 | GHR       | CREBBP,FAF1,GHR             | 18 |
| FAF1 | HIF1A     | FAF1,GAPDH,HIF1A,RPL5       | 18 |
| FAF1 | HMBS      | FAF1,HMBS                   | 18 |
| FAF1 | HSP90AA1  | FAF1,HSP90AA1               | 18 |
| FAF1 | HSPA4     | FAF1,HSPA4                  | 18 |
| FAF1 | HSPA4L    | FAF1,HSPA4L,HSPA8           | 18 |
| FAF1 | HSPA5     | CASP8,FAF1,HSPA5,RPL5       | 18 |
| FAF1 | HSPA8     | FAF1,HSPA8                  | 18 |
| FAF1 | HSPD1     | FAF1,HSPD1                  | 18 |

|       |         |                                  |    |
|-------|---------|----------------------------------|----|
| FAF1  | IL4R    | FAF1,IL4R                        | 18 |
| FAF1  | IRF8    | FAF1,IRF8                        | 18 |
| FAF1  | LMOD1   | FAF1,LMOD1,NPM1                  | 18 |
| FAF1  | MAGED2  | FAF1,MAGED2                      | 18 |
| FAF1  | MRC2    | FAF1,HSPD1,MRC2                  | 18 |
| FAF1  | NEUROD1 | FAF1,NEUROD1                     | 18 |
| FAF1  | NPM1    | FAF1,NPM1                        | 18 |
| FAF1  | NPPA    | FAF1,NPPA                        | 18 |
| FAF1  | NR3C2   | CREBBP,FAF1,HSP90AA1,HSPA4,NR3C2 | 18 |
| FAF1  | NR4A1   | FAF1,NR4A1                       | 18 |
| FAF1  | PARP1   | FAF1,PARP1                       | 18 |
| FAF1  | PHB2    | FAF1,FAS,GAPDH,HSPA8,PHB2,SET    | 18 |
| FAF1  | POU2F2  | FAF1,GAPDH,POU2F2                | 18 |
| FAF1  | RAG2    | FAF1,RAG2                        | 18 |
| FAF1  | RAPGEF1 | FAF1,HSPA4,RAPGEF1               | 18 |
| FAF1  | RPL5    | AKT1,CASP8,FAF1,FAS,RPL5         | 18 |
| FAF1  | RUNX1   | CDKN1A,FAF1,HIF1A,RUNX1          | 18 |
| FAF1  | SET     | FAF1,FAS,RPL5,SET                | 18 |
| FAF1  | SKP1    | CASP8,FAF1,GAPDH,SET,SKP1        | 18 |
| FAF1  | SLC22A2 | FAF1,PARP1,SLC22A2               | 18 |
| FAF1  | ST13    | FAF1,ST13                        | 18 |
| FAF1  | TET1    | FAF1,HIF1A,TET1                  | 18 |
| FAF1  | TNFSF10 | FAF1,SET,TNFSF10,TNFSF13         | 18 |
| FAF1  | TNFSF13 | FAF1,TNFSF10,TNFSF13             | 18 |
| PRKCE | AHCY    | AHCY,PRKCE                       | 18 |
| PRKCE | ANGPT2  | ANGPT2,PRKCE                     | 18 |
| PRKCE | APP     | APP,PRKCE                        | 18 |
| PRKCE | ATP2A2  | ATP2A2,EGFR,PRKCE                | 18 |
| PRKCE | BAD     | BAD,BAX,HSPB1,MAPK3,PRKCE        | 18 |
| PRKCE | BAX     | BAX,HSP90AA1,HSPB1,MAPK3,PRKCE   | 18 |
| PRKCE | BCOR    | BCOR,MAPK3,PRKCE                 | 18 |
| PRKCE | BRAF    | BAX,BRAF,HSPB1,MAPK3,PRKCE       | 18 |
| PRKCE | BTK     | BAX,BTK,HSPB1,PRKCE              | 18 |
| PRKCE | CAD     | CAD,PRKCE                        | 18 |
| PRKCE | CD2     | CD2,CD22,CD58,PRKCE              | 18 |
| PRKCE | CD22    | CD22,EGFR,PRKCE                  | 18 |
| PRKCE | CD58    | CD2,CD58,PRKCE                   | 18 |
| PRKCE | CD70    | CD70,PRKCE                       | 18 |
| PRKCE | CEACAM1 | CEACAM1,EGFR,PRKCE,SRC           | 18 |
| PRKCE | CNR1    | CNR1,EGFR,PRKCE                  | 18 |
| PRKCE | CTLA4   | CTLA4,GPI1BA,PRKCE               | 18 |
| PRKCE | DLX4    | DLX4,PRKCE,SRC                   | 18 |
| PRKCE | EGFR    | EGFR,PRKCE                       | 18 |

|       |          |                                             |    |
|-------|----------|---------------------------------------------|----|
| PRKCE | F2R      | F2R,HSP90AA1,PRKCE                          | 18 |
| PRKCE | GP1BA    | GP1BA,PRKCE                                 | 18 |
| PRKCE | HBEGF    | EGFR,HBEGF,PRKCE                            | 18 |
| PRKCE | HMBS     | APP,HMBS,PRKCE                              | 18 |
| PRKCE | HSP90AA1 | BAX,EGFR,HSP90AA1,HSPB1,MAPK3,PRKCE,SR<br>C | 18 |
| PRKCE | HSPA8    | EGFR,HSPA8,HSPB1,MAPK3,PRKCE,SRC            | 18 |
| PRKCE | HSPB1    | BAX,HSPB1,PRKCE,SRC                         | 18 |
| PRKCE | IER3     | APP,EGFR,IER3,PRKCE                         | 18 |
| PRKCE | IFNAR2   | IFNAR2,PRKCE                                | 18 |
| PRKCE | IL4R     | IL4R,PRKCE                                  | 18 |
| PRKCE | IL6      | IL6,PRKCE,SRC                               | 18 |
| PRKCE | IL7R     | IL7R,PRKCE                                  | 18 |
| PRKCE | LMOD1    | LMOD1,PRKCE                                 | 18 |
| PRKCE | MAP4K1   | BRAF,EGFR,MAP4K1,PRKCE,RAF1,SLC3A1          | 18 |
| PRKCE | MAPK1    | MAPK1,PRKCE                                 | 18 |
| PRKCE | MAPK3    | BAX,HSPB1,MAPK3,PRKCE                       | 18 |
| PRKCE | MRC2     | MRC2,PRKCE,RAF1                             | 18 |
| PRKCE | MYO1G    | MYO1G,PRKCE                                 | 18 |
| PRKCE | PLEKHM1  | EGFR,PLEKHM1,PRKCE                          | 18 |
| PRKCE | PTPRT    | ATP2A2,EGFR,PRKCE,PTPRT,SLC3A1              | 18 |
| PRKCE | RAF1     | EGFR,HSP90AA1,PRKCE,RAF1,SRC                | 18 |
| PRKCE | RASGRP3  | BAX,PRKCE,RASGRP3                           | 18 |
| PRKCE | SAMSN1   | PRKCE,RAF1,SAMSN1,SRC                       | 18 |
| PRKCE | SELL     | PRKCE,SELL                                  | 18 |
| PRKCE | SLC3A1   | EGFR,PRKCE,SLC3A1                           | 18 |
| PRKCE | SNCA     | MAPK1,MAPK3,PRKCE,SNCA                      | 18 |
| PRKCE | SRC      | APP,MAPK1,PRKCE,SRC                         | 18 |
| PRKCE | TNFSF13  | APP,PRKCE,TNFSF13                           | 18 |
| PRKCE | ZBTB16   | PRKCE,ZBTB16                                | 18 |
| HDAC1 | APEX1    | APEX1,HDAC1                                 | 18 |
| HDAC1 | BCL11B   | BCL11B,HDAC1                                | 18 |
| HDAC1 | BCL2     | BCL2,HDAC1                                  | 18 |
| HDAC1 | BCL3     | BCL3,HDAC1                                  | 18 |
| HDAC1 | BIRC2    | BIRC2,HDAC1                                 | 18 |
| HDAC1 | CASP1    | CASP1,HDAC1                                 | 18 |
| HDAC1 | CDCA7L   | CDCA7L,HDAC1,HOXA9,MEIS1                    | 18 |
| HDAC1 | CDK1     | CDK1,CEBPB,HDAC1,PML,TP73                   | 18 |
| HDAC1 | CDKN1B   | CDKN1B,DIABLO,HDAC1                         | 18 |
| HDAC1 | CEBPB    | CEBPB,HDAC1                                 | 18 |
| HDAC1 | CTCF     | CTCF,HDAC1                                  | 18 |
| HDAC1 | DAXX     | DAXX,DNMT1,DNMT3A,EZH2,HDAC1,SPI1           | 18 |
| HDAC1 | DIABLO   | CDKN1B,DIABLO,HDAC1                         | 18 |



|       |         |                                        |    |
|-------|---------|----------------------------------------|----|
| HDAC1 | DNMT1   | DNMT1, DNMT3A, EZH2, HDAC1, SPI1       | 18 |
| HDAC1 | DNMT3A  | DNMT3A, EZH2, HDAC1                    | 18 |
| HDAC1 | ELF4    | CTCF, ELF4, HDAC1, PML                 | 18 |
| HDAC1 | ELL     | ELL, HDAC1                             | 18 |
| HDAC1 | EVPL    | EVPL, HDAC1                            | 18 |
| HDAC1 | EZH2    | EZH2, GATA1, HDAC1                     | 18 |
| HDAC1 | FHIT    | FHIT, HDAC1                            | 18 |
| HDAC1 | FOXP3   | FOXP3, HDAC1                           | 18 |
| HDAC1 | GATA1   | EZH2, GATA1, HDAC1                     | 18 |
| HDAC1 | GATA2   | GATA2, HDAC1, MYB                      | 18 |
| HDAC1 | HOXA9   | CDCA7L, HDAC1, HOXA9                   | 18 |
| HDAC1 | IL7R    | EZH2, HDAC1, IL7R                      | 18 |
| HDAC1 | KLF4    | HDAC1, KLF4                            | 18 |
| HDAC1 | MAP2K1  | HDAC1, MAP2K1                          | 18 |
| HDAC1 | MAPK8   | HDAC1, MAPK8                           | 18 |
| HDAC1 | MEIS1   | CDCA7L, HDAC1, HOXA9, MEIS1            | 18 |
| HDAC1 | MLLT1   | HDAC1, MLLT1, NSD1                     | 18 |
| HDAC1 | MYB     | HDAC1, MYB                             | 18 |
| HDAC1 | NEUROD1 | HDAC1, NEUROD1                         | 18 |
| HDAC1 | NFE2    | HDAC1, NFE2                            | 18 |
| HDAC1 | NSD1    | HDAC1, MLLT1, NSD1                     | 18 |
| HDAC1 | PARP1   | HDAC1, PARP1                           | 18 |
| HDAC1 | PML     | HDAC1, PML, TP73                       | 18 |
| HDAC1 | RAPGEF1 | HDAC1, RAPGEF1                         | 18 |
| HDAC1 | RFC1    | EZH2, HDAC1, RFC1                      | 18 |
| HDAC1 | SAMSN1  | HDAC1, SAMSN1                          | 18 |
| HDAC1 | SF3B1   | HDAC1, SF3B1                           | 18 |
| HDAC1 | SFPQ    | CEBPB, HDAC1, SFPQ, TP73               | 18 |
| HDAC1 | SMC1A   | HDAC1, SMC1A                           | 18 |
| HDAC1 | SPI1    | DAXX, DNMT1, DNMT3A, EZH2, HDAC1, SPI1 | 18 |
| HDAC1 | SYK     | HDAC1, SYK                             | 18 |
| HDAC1 | TOP2B   | HDAC1, PARP1, TOP2B                    | 18 |
| HDAC1 | TP73    | CEBPB, HDAC1, PML, TP73                | 18 |
| HDAC1 | USP18   | HDAC1, USP18                           | 18 |
| HDAC1 | ZBTB16  | HDAC1, ZBTB16                          | 18 |
| DISC1 | ABL1    | ABL1, DISC1, DNM2, EP300               | 18 |
| DISC1 | ACTBL2  | ACTBL2, DISC1                          | 18 |
| DISC1 | ARID1A  | ARID1A, DISC1                          | 18 |
| DISC1 | ATP2A2  | ATP2A2, DISC1                          | 18 |
| DISC1 | CD22    | CD22, DISC1                            | 18 |
| DISC1 | CGA     | CGA, DISC1                             | 18 |
| DISC1 | CTLA4   | CTLA4, DISC1                           | 18 |
| DISC1 | CTNNA1  | CTNNA1, DISC1                          | 18 |

|         |        |                                               |    |
|---------|--------|-----------------------------------------------|----|
| DISC1   | DCK    | DCK,DISC1                                     | 18 |
| DISC1   | DCTN1  | DCTN1,DISC1                                   | 18 |
| DISC1   | DLX4   | ABL1,DISC1,DLX4                               | 18 |
| DISC1   | DNM2   | DISC1,DNM2                                    | 18 |
| DISC1   | DNTT   | DISC1,DNTT                                    | 18 |
| DISC1   | EFHC1  | DISC1,EFHC1                                   | 18 |
| DISC1   | EGR1   | DCTN1,DISC1,EGR1                              | 18 |
| DISC1   | EP300  | DISC1,DNM2,EP300                              | 18 |
| DISC1   | EWSR1  | DISC1,EWSR1                                   | 18 |
| DISC1   | EZH2   | DISC1,EP300,EZH2                              | 18 |
| DISC1   | FBXW7  | DISC1,FBXW7                                   | 18 |
| DISC1   | FN1    | DISC1,FN1                                     | 18 |
| DISC1   | IKZF1  | DISC1,IKZF1                                   | 18 |
| DISC1   | IL4R   | DISC1,IL4R                                    | 18 |
| DISC1   | IL6    | DISC1,IL6                                     | 18 |
| DISC1   | IL7R   | DISC1,EZH2,IL7R                               | 18 |
| DISC1   | IL9R   | DISC1,IL4R,IL7R,IL9R                          | 18 |
| DISC1   | IRF8   | DISC1,IRF8                                    | 18 |
| DISC1   | LMOD1  | DISC1,LMOD1,NPM1                              | 18 |
| DISC1   | LRP1   | DISC1,LRP1,POT1                               | 18 |
| DISC1   | MKI67  | DISC1,DNM2,EP300,MKI67                        | 18 |
| DISC1   | MLLT3  | DISC1,MLLT3                                   | 18 |
| DISC1   | MVP    | DISC1,MVP                                     | 18 |
| DISC1   | NPM1   | DISC1,NPM1                                    | 18 |
| DISC1   | PFDN4  | DISC1,PFDN4                                   | 18 |
| DISC1   | POT1   | DISC1,POT1                                    | 18 |
| DISC1   | RAD21  | DISC1,EZH2,FBXW7,RAD21                        | 18 |
| DISC1   | RAG2   | DISC1,RAG2                                    | 18 |
| DISC1   | SUZ12  | DISC1,SUZ12                                   | 18 |
| DISC1   | TET1   | DISC1,FBXW7,TET1                              | 18 |
| DISC1   | THBS1  | DISC1,THBS1                                   | 18 |
| DISC1   | UIMC1  | DCTN1,DISC1,POT1,UIMC1                        | 18 |
| DISC1   | ZMYM2  | DISC1,ZMYM2                                   | 18 |
| DISC1   | ZNF79  | DISC1,IKZF1,ZNF79                             | 18 |
| RPS6KA2 | ANGPT2 | ANGPT2,RPS6KA2                                | 18 |
| RPS6KA2 | BAD    | BAD,MAPK3,RPS6KA2                             | 18 |
| RPS6KA2 | BCOR   | BCOR,CREB1,CREBBP,FOS,MAPK3,RPL34,RPS6<br>KA2 | 18 |
| RPS6KA2 | BRAF   | BRAF,MAPK3,RPS6KA2                            | 18 |
| RPS6KA2 | CD2    | CD2,CD22,CD58,RPS6KA2                         | 18 |
| RPS6KA2 | CD22   | CD22,RPS6KA2                                  | 18 |
| RPS6KA2 | CD58   | CD2,CD58,RPS6KA2                              | 18 |
| RPS6KA2 | CD70   | CD70,RPS6KA2                                  | 18 |

|         |         |                            |    |
|---------|---------|----------------------------|----|
| RPS6KA2 | CEACAM1 | CEACAM1,RPS6KA2            | 18 |
| RPS6KA2 | CLPB    | CLPB,RPS6KA2               | 18 |
| RPS6KA2 | CR2     | CR2,RPS6KA2                | 18 |
| RPS6KA2 | CREB1   | CREB1,RPS6KA2              | 18 |
| RPS6KA2 | CREBBP  | CREBBP,RPS6KA2             | 18 |
| RPS6KA2 | CTLA4   | CTLA4,GP1BA,RPS6KA2        | 18 |
| RPS6KA2 | DDX10   | DDX10,RPS6KA2              | 18 |
| RPS6KA2 | DLX4    | DLX4,RPS6KA2               | 18 |
| RPS6KA2 | FGFR2   | FGFR2,NISCH,RPS6KA2        | 18 |
| RPS6KA2 | FOS     | FOS,RPS6KA2                | 18 |
| RPS6KA2 | GP1BA   | GP1BA,RPS6KA2              | 18 |
| RPS6KA2 | HMBS    | HMBS,RPS6KA2               | 18 |
| RPS6KA2 | HSPA8   | HSPA8,MAPK3,RPS6KA2        | 18 |
| RPS6KA2 | IER3    | IER3,RPS6KA2               | 18 |
| RPS6KA2 | IFNAR2  | IFNAR2,RPS6KA2             | 18 |
| RPS6KA2 | IL4R    | IL4R,RPS6KA2               | 18 |
| RPS6KA2 | IL6     | CREB1,IL6,RPS6KA2          | 18 |
| RPS6KA2 | IL7R    | IL7R,RPS6KA2               | 18 |
| RPS6KA2 | MAP2K1  | CREBBP,MAP2K1,RPS6KA2      | 18 |
| RPS6KA2 | MAP4K1  | BRAF,MAP4K1,RPS6KA2        | 18 |
| RPS6KA2 | MAPK3   | MAPK3,RPS6KA2              | 18 |
| RPS6KA2 | NISCH   | CREBBP,NISCH,RPL34,RPS6KA2 | 18 |
| RPS6KA2 | RPL34   | FOS,MAP2K1,RPL34,RPS6KA2   | 18 |
| RPS6KA2 | SELL    | RPS6KA2,SELL               | 18 |
| RPS6KA2 | TNFSF13 | RPS6KA2,TNFSF13            | 18 |

### **Sample 027**

| <b>Candidate AML genes</b> | <b>Known AML genes</b><br>(of which the module includes candidate AML genes) | <b>ALL the AML genes involved in current module</b> | <b>Sample-ID</b> |
|----------------------------|------------------------------------------------------------------------------|-----------------------------------------------------|------------------|
| ESR1                       | ASXL1                                                                        | ASXL1,ESR1                                          | 27               |
| ESR1                       | BCL3                                                                         | BCL3,ESR1,MAPK3,NFKB1,TBL1XR1                       | 27               |
| ESR1                       | BLNK                                                                         | BLNK,ESR1,PIK3R1                                    | 27               |
| ESR1                       | CAD                                                                          | CAD,ESR1                                            | 27               |
| ESR1                       | CAV1                                                                         | CAV1,ESR1,NFKB1                                     | 27               |
| ESR1                       | CCND1                                                                        | CCND1,ESR1,MSH6                                     | 27               |
| ESR1                       | CDH1                                                                         | CDH1,CTNNB1,ESR1,JUP                                | 27               |
| ESR1                       | CDK1                                                                         | CDK1,ESR1,RXRA                                      | 27               |
| ESR1                       | CEBPB                                                                        | CEBPB,ESR1,HDAC9                                    | 27               |
| ESR1                       | CHD2                                                                         | CHD2,ESR1,SMC1A                                     | 27               |
| ESR1                       | CLTC                                                                         | CLTC,ESR1                                           | 27               |
| ESR1                       | CNTN2                                                                        | CNTN2,ESR1                                          | 27               |

|      |          |                                     |    |
|------|----------|-------------------------------------|----|
| ESR1 | COX10    | COX10,ESR1                          | 27 |
| ESR1 | CREBBP   | CREBBP,ESR1,MSH6,PBX1               | 27 |
| ESR1 | CTNNB1   | CDH1,CTNNB1,ESR1,JUP                | 27 |
| ESR1 | DAXX     | DAXX,ESR1,FOS                       | 27 |
| ESR1 | DCT      | DCT,ESR1                            | 27 |
| ESR1 | DDX3X    | DDX3X,ESR1                          | 27 |
| ESR1 | DIO3     | CTNNB1,DIO3,ESR1                    | 27 |
| ESR1 | ERBB2    | ERBB2,ESR1                          | 27 |
| ESR1 | EWSR1    | ESR1,EWSR1,SF3B1                    | 27 |
| ESR1 | FOS      | ESR1,FOS                            | 27 |
| ESR1 | GAPDH    | ERBB2,ESR1,GAPDH,SRC                | 27 |
| ESR1 | HDAC9    | ESR1,HDAC9                          | 27 |
| ESR1 | HLA-G    | ESR1,HLA-G                          | 27 |
| ESR1 | HNF4A    | ESR1,HNF4A                          | 27 |
| ESR1 | HSPA4L   | ESR1,HSPA4L                         | 27 |
| ESR1 | HSPA8    | ESR1,HSPA8                          | 27 |
| ESR1 | HSPD1    | ESR1,HSPD1                          | 27 |
| ESR1 | JAK2     | ERBB2,ESR1,JAK2,MDM2                | 27 |
| ESR1 | JUNB     | ESR1,JUNB                           | 27 |
| ESR1 | JUP      | CDH1,CTNNB1,ESR1,JUP                | 27 |
| ESR1 | LCK      | CDH1,CTNNB1,ESR1,LCK                | 27 |
| ESR1 | LMOD1    | CTNNB1,ESR1,LMOD1,NPM1              | 27 |
| ESR1 | MAPK3    | ESR1,MAPK3                          | 27 |
| ESR1 | MAPKAPK2 | ESR1,MAPKAPK2                       | 27 |
| ESR1 | MDM2     | ESR1,MDM2,SRC                       | 27 |
| ESR1 | MED12    | ESR1,MED12                          | 27 |
| ESR1 | MSH2     | CREBBP,ESR1,MSH2,MSH6               | 27 |
| ESR1 | MSH6     | ESR1,MSH2,MSH6                      | 27 |
| ESR1 | MVP      | ESR1,MVP,MYC                        | 27 |
| ESR1 | MYC      | CDH1,ESR1,HSPA8,MYC                 | 27 |
| ESR1 | NCOA6    | ESR1,NCOA6,PPARGC1A,RXRA            | 27 |
| ESR1 | NFKB1    | ESR1,NFKB1                          | 27 |
| ESR1 | NPM1     | ERBB2,ESR1,JAK2,MDM2,NPM1,PIK3R1    | 27 |
| ESR1 | NPPA     | ESR1,HNF4A,HSPD1,NPPA               | 27 |
| ESR1 | NRAS     | ESR1,NRAS,SRC                       | 27 |
| ESR1 | PACSIN3  | ESR1,HSPA8,HSPD1,PACSIN3            | 27 |
| ESR1 | PARP1    | ESR1,HDAC9,PARP1                    | 27 |
| ESR1 | PBX1     | CREBBP,ESR1,MDM2,PBX1               | 27 |
| ESR1 | PGR      | ESR1,PARP1,PGR                      | 27 |
| ESR1 | PIK3CA   | ESR1,PIK3CA,PIK3R1                  | 27 |
| ESR1 | PIK3R1   | CCND1,ESR1,PIK3R1,PPARGC1A,RXRA,SRC | 27 |
| ESR1 | PPARGC1A | ESR1,HNF4A,NFKB1,PPARGC1A,RXRA      | 27 |
| ESR1 | PPP2R3A  | CDK1,ESR1,PPP2R3A                   | 27 |

|      |         |                                       |    |
|------|---------|---------------------------------------|----|
| ESR1 | ROS1    | CTNNB1,ESR1,ROS1                      | 27 |
| ESR1 | RTKN    | CDH1,ESR1,JUP,RTKN                    | 27 |
| ESR1 | RXRA    | ESR1,FOS,PARP1,RXRA                   | 27 |
| ESR1 | SCYL1   | ESR1,SCYL1                            | 27 |
| ESR1 | SDC1    | ERBB2,ESR1,SDC1                       | 27 |
| ESR1 | SET     | ESR1,SET                              | 27 |
| ESR1 | SF3B1   | ESR1,SF3B1                            | 27 |
| ESR1 | SFPQ    | ESR1,SF3B1,SFPQ                       | 27 |
| ESR1 | SKP1    | ESR1,SKP1                             | 27 |
| ESR1 | SKP2    | CREBBP,ESR1,SKP2                      | 27 |
| ESR1 | SMC1A   | CTNNB1,ESR1,MSH6,SMC1A                | 27 |
| ESR1 | SNRPE   | ESR1,SF3B1,SNRPE                      | 27 |
| ESR1 | SRC     | ESR1,RXRA,SRC                         | 27 |
| ESR1 | SRSF2   | ESR1,PPARGC1A,SRSF2                   | 27 |
| ESR1 | STAT5A  | ESR1,LCK,STAT5A                       | 27 |
| ESR1 | TBL1XR1 | CTNNB1,ESR1,TBL1XR1                   | 27 |
| ESR1 | TCF15   | ESR1,MSH2,MSH6,TCF15                  | 27 |
| ESR1 | TET1    | CREBBP,ESR1,STAT5A,TET1               | 27 |
| ESR1 | ZMYM3   | ESR1,ZMYM3                            | 27 |
| ESR1 | ZNF79   | ESR1,ZNF79                            | 27 |
| FYN  | BTK     | BTK,CAV1,FYN                          | 27 |
| FYN  | C3      | C3,FYN                                | 27 |
| FYN  | C5      | C3,C5,FYN                             | 27 |
| FYN  | CASP9   | CASP9,FYN,RASA1,RPL5                  | 27 |
| FYN  | CAV1    | CAV1,FYN                              | 27 |
| FYN  | CBL     | CBL,FYN,LCK                           | 27 |
| FYN  | CD19    | BTK,CBL,CD19,CD79A,CR2,FYN,SYK        | 27 |
| FYN  | CD2     | CD2,CD5,CD58,FYN,LCK                  | 27 |
| FYN  | CD44    | CD44,FYN                              | 27 |
| FYN  | CD5     | CBL,CD2,CD5,CD79A,FYN,LCK,RASA1,ZAP70 | 27 |
| FYN  | CD58    | CD2,CD5,CD58,FYN                      | 27 |
| FYN  | CD79A   | CD79A,FYN,LCK                         | 27 |
| FYN  | CD86    | CD86,CTLA4,FYN,LCK                    | 27 |
| FYN  | CR2     | BTK,CBL,CD19,CD79A,CR2,FYN            | 27 |
| FYN  | CSF1R   | CAV1,CBL,CSF1R,FYN,KIT,RASA1          | 27 |
| FYN  | CSF2RB  | CSF2RB,EPOR,FYN,JAK2,KDR,KIT,SYK      | 27 |
| FYN  | CSPG4   | CSPG4,FYN                             | 27 |
| FYN  | CTLA4   | CD86,CTLA4,FYN,JAK2,LCK,PTPN11        | 27 |
| FYN  | DLX4    | DLX4,FYN                              | 27 |
| FYN  | DNM2    | DNM2,FYN                              | 27 |
| FYN  | DOK1    | CAV1,DOK1,DOK2,FYN                    | 27 |
| FYN  | DOK2    | DOK1,DOK2,FYN,LCK,RASA1               | 27 |

|       |           |                                |    |
|-------|-----------|--------------------------------|----|
| FYN   | EPOR      | CSF2RB,EPOR,FYN,JAK2,KIT,SYK   | 27 |
| FYN   | FAS       | CAV1,FAS,FYN,LCK               | 27 |
| FYN   | FCGR3A    | BTK,FCGR3A,FYN,LCK,SYK,ZAP70   | 27 |
| FYN   | FLT1      | FLT1,FYN,KDR                   | 27 |
| FYN   | GAPDH     | FYN,GAPDH,SYK                  | 27 |
| FYN   | GUCY2D    | FYN,GUCY2D                     | 27 |
| FYN   | ICOS      | FYN,ICOS,SYK                   | 27 |
| FYN   | IL18R1    | CD2,FYN,IL18R1,LCK             | 27 |
| FYN   | IL1B      | FYN,IL1B                       | 27 |
| FYN   | IL2RB     | FYN,IL2RB,LCK,SYK              | 27 |
| FYN   | IL7R      | CBL,FYN,IL7R,KIT,MS4A1,SOCS1   | 27 |
| FYN   | JAK2      | FYN,JAK2                       | 27 |
| FYN   | KDR       | CAV1,FLT1,FYN,KDR              | 27 |
| FYN   | KIT       | CAV1,CD44,EPOR,FYN,IL7R,KIT    | 27 |
| FYN   | LCK       | FYN,LCK                        | 27 |
| FYN   | MAGED2    | FYN,MAGED2                     | 27 |
| FYN   | MAP4K1    | FYN,MAP4K1                     | 27 |
| FYN   | MAT2A     | FYN,LCK,MAT2A                  | 27 |
| FYN   | MS4A1     | FYN,IL7R,LCK,MS4A1             | 27 |
| FYN   | NCAM1     | FYN,NCAM1,SDC1                 | 27 |
| FYN   | PRDX2     | FYN,PRDX2                      | 27 |
| FYN   | PTPN11    | DNM2,FYN,LCK,PTPN11            | 27 |
| FYN   | RAPGEF1   | FYN,RAPGEF1                    | 27 |
| FYN   | RASA1     | FYN,RASA1                      | 27 |
| FYN   | RPL5      | FYN,RASA1,RPL5                 | 27 |
| FYN   | SDC1      | BTK,FYN,NCAM1,SDC1             | 27 |
| FYN   | SNCA      | FYN,SNCA                       | 27 |
| FYN   | SOCS1     | FYN,LCK,SOCS1                  | 27 |
| FYN   | SPN       | FYN,SPN                        | 27 |
| FYN   | SYK       | FYN,SYK                        | 27 |
| FYN   | THY1      | FYN,LCK,RASA1,THY1             | 27 |
| FYN   | TNFRSF10B | FYN,TNFRSF10B                  | 27 |
| FYN   | ZAP70     | FCGR3A,FYN,LCK,RASA1,ZAP70     | 27 |
| HDAC1 | AFF1      | AFF1,HDAC1                     | 27 |
| HDAC1 | APEX1     | APEX1,HDAC1                    | 27 |
| HDAC1 | BCL11B    | BCL11B,HDAC1                   | 27 |
| HDAC1 | BCL2      | BCL2,HDAC1                     | 27 |
| HDAC1 | BCL3      | BCL3,EP300,HDAC1,NFKB2,TBL1XR1 | 27 |
| HDAC1 | BCOR      | BCOR,CTCF,HDAC1                | 27 |
| HDAC1 | CAD       | CAD,HDAC1                      | 27 |
| HDAC1 | CBFA2T3   | CBFA2T3,HDAC1                  | 27 |
| HDAC1 | CBFB      | CBFB,EP300,GATA3,HDAC1,RUNX1T1 | 27 |
| HDAC1 | CDCA7L    | CDCA7L,HDAC1,HOXA9,PBX1        | 27 |

|       |         |                                    |    |
|-------|---------|------------------------------------|----|
| HDAC1 | CDKN1A  | CDKN1A,HDAC1                       | 27 |
| HDAC1 | CEBPB   | CEBPB,HDAC1,TP53                   | 27 |
| HDAC1 | CHFR    | CHFR,HDAC1                         | 27 |
| HDAC1 | CTCF    | CTCF,HDAC1                         | 27 |
| HDAC1 | DLD     | DLD,HDAC1                          | 27 |
| HDAC1 | DNMT1   | CEBPB,DNMT1,HDAC1,TP53             | 27 |
| HDAC1 | DNMT3A  | DNMT1,DNMT3A,EZH2,HDAC1            | 27 |
| HDAC1 | EFHC1   | CDCA7L,EFHC1,HDAC1,HOXA9,PBX1      | 27 |
| HDAC1 | EGR1    | EGR1,HDAC1,KLF4                    | 27 |
| HDAC1 | ELF4    | ELF4,HDAC1                         | 27 |
| HDAC1 | ELL     | ELL,EP300,HDAC1,TP53               | 27 |
| HDAC1 | EP300   | EP300,EZH2,GATA1,GATA3,HDAC1,STAT3 | 27 |
| HDAC1 | ETV6    | ETV6,HDAC1,TP53                    | 27 |
| HDAC1 | EZH2    | EP300,EZH2,GATA1,GATA3,HDAC1,STAT3 | 27 |
| HDAC1 | FOXP3   | EP300,FOXP3,HDAC1                  | 27 |
| HDAC1 | GATA1   | EP300,EZH2,GATA1,GATA3,HDAC1,STAT3 | 27 |
| HDAC1 | GATA2   | GATA1,GATA2,HDAC1,TAL1             | 27 |
| HDAC1 | GATA3   | EP300,EZH2,GATA1,GATA3,HDAC1,STAT3 | 27 |
| HDAC1 | HOXA9   | HDAC1,HOXA9,PBX1                   | 27 |
| HDAC1 | IDH2    | HDAC1,IDH2                         | 27 |
| HDAC1 | IKZF1   | HDAC1,IKZF1                        | 27 |
| HDAC1 | KLF4    | EGR1,EP300,HDAC1,KLF4,TP53         | 27 |
| HDAC1 | NFKB2   | HDAC1,NFKB2                        | 27 |
| HDAC1 | NR3C1   | HDAC1,NR3C1,TP53                   | 27 |
| HDAC1 | PBX1    | CDCA7L,HDAC1,HOXA9,PBX1            | 27 |
| HDAC1 | PFDN4   | HDAC1,PFDN4                        | 27 |
| HDAC1 | PHF6    | HDAC1,PHF6                         | 27 |
| HDAC1 | PIK3CA  | HDAC1,PIK3CA                       | 27 |
| HDAC1 | RUNX1T1 | HDAC1,RUNX1T1                      | 27 |
| HDAC1 | SALL4   | EZH2,HDAC1,SALL4                   | 27 |
| HDAC1 | SAMSN1  | HDAC1,SAMSN1                       | 27 |
| HDAC1 | SPI1    | DNMT1,DNMT3A,HDAC1,SPI1            | 27 |
| HDAC1 | STAT3   | EP300,EZH2,GATA1,GATA3,HDAC1,STAT3 | 27 |
| HDAC1 | STAT5A  | EP300,HDAC1,STAT5A                 | 27 |
| HDAC1 | TAL1    | EP300,GATA3,HDAC1,TAL1             | 27 |
| HDAC1 | TBL1XR1 | HDAC1,TBL1XR1                      | 27 |
| HDAC1 | TOP2A   | HDAC1,TOP2A,TOP2B                  | 27 |
| HDAC1 | TOP2B   | HDAC1,TOP2A,TOP2B                  | 27 |
| HDAC1 | TP53    | HDAC1,TP53                         | 27 |
| HDAC1 | TP73    | HDAC1,TP73                         | 27 |
| HDAC1 | VEGFA   | CEBPB,EP300,HDAC1,TP73,VEGFA       | 27 |
| HDAC1 | ZBTB16  | HDAC1,TP53,ZBTB16                  | 27 |
| HDAC1 | ZMYM2   | HDAC1,ZMYM2                        | 27 |

|       |          |                              |    |
|-------|----------|------------------------------|----|
| HDAC1 | ZMYM3    | HDAC1,ZMYM3                  | 27 |
| STAT1 | ATM      | ATM,STAT1                    | 27 |
| STAT1 | BCL3     | BCL3,STAT1                   | 27 |
| STAT1 | CASP3    | CASP3,DCTN1,STAT1            | 27 |
| STAT1 | CCR1     | CCR1,STAT1                   | 27 |
| STAT1 | CCR5     | CCR5,CXCR4,JAK2,STAT1        | 27 |
| STAT1 | CD40     | CD40,STAT1                   | 27 |
| STAT1 | CSF2RB   | CSF2RB,JAK2,KDR,KIT,STAT1    | 27 |
| STAT1 | CXCR4    | CXCR4,STAT1                  | 27 |
| STAT1 | DCTN1    | DCTN1,STAT1                  | 27 |
| STAT1 | DLD      | DLD,STAT1                    | 27 |
| STAT1 | FLT1     | FLT1,KDR,STAT1               | 27 |
| STAT1 | FOXP3    | FOXP3,STAT1                  | 27 |
| STAT1 | GFAP     | GFAP,STAT1                   | 27 |
| STAT1 | HSPA4L   | HSPA4L,STAT1                 | 27 |
| STAT1 | IFNAR2   | IFNAR2,ISG15,STAT1           | 27 |
| STAT1 | IFNG     | IFNG,JAK2,STAT1              | 27 |
| STAT1 | IL1B     | IL1B,IRAK1,IRF4,IRF8,STAT1   | 27 |
| STAT1 | IL2RA    | IL2RA,IL2RB,IRF4,STAT1,TBX21 | 27 |
| STAT1 | IL2RB    | IL2RA,IL2RB,STAT1            | 27 |
| STAT1 | IL6ST    | IL6ST,LIF,STAT1              | 27 |
| STAT1 | IRAK1    | IRAK1,STAT1                  | 27 |
| STAT1 | IRF4     | IL2RA,IL2RB,IRF4,STAT1,TBX21 | 27 |
| STAT1 | IRF8     | IL1B,IRF8,ISG15,PTPN11,STAT1 | 27 |
| STAT1 | ISG15    | ISG15,STAT1                  | 27 |
| STAT1 | JAK2     | JAK2,STAT1                   | 27 |
| STAT1 | KDR      | FLT1,KDR,STAT1               | 27 |
| STAT1 | KIT      | KIT,STAT1                    | 27 |
| STAT1 | LIF      | IL6ST,LIF,STAT1              | 27 |
| STAT1 | MPL      | JAK2,MPL,STAT1               | 27 |
| STAT1 | NOS2     | NOS2,STAT1                   | 27 |
| STAT1 | PIK3CA   | PIK3CA,STAT1                 | 27 |
| STAT1 | PML      | PML,RXRA,STAT1               | 27 |
| STAT1 | PTPN11   | IRF8,PTPN11,STAT1            | 27 |
| STAT1 | RXRA     | RXRA,STAT1                   | 27 |
| STAT1 | STAT5A   | STAT1,STAT5A                 | 27 |
| STAT1 | TBX21    | IL2RA,IRF4,STAT1,TBX21       | 27 |
| STAT1 | TLR7     | STAT1,TLR7                   | 27 |
| STAT1 | TNFRSF1A | STAT1,TNFRSF1A               | 27 |
| STAT1 | TP73     | STAT1,TP73                   | 27 |
| STAT1 | VDR      | RXRA,STAT1,VDR               | 27 |
| LMNA  | ATM      | ATM,LMNA                     | 27 |
| LMNA  | BIRC3    | BIRC3,LMNA                   | 27 |



|      |         |                                   |    |
|------|---------|-----------------------------------|----|
| LMNA | CAPN2   | CAPN2,FLT3,LMNA                   | 27 |
| LMNA | CASP1   | CASP1,EP300,LMNA                  | 27 |
| LMNA | CCND1   | CCND1,LMNA                        | 27 |
| LMNA | CDK1    | CDK1,LMNA                         | 27 |
| LMNA | CEBPE   | CEBPE,LMNA                        | 27 |
| LMNA | CRKL    | CRKL,LMNA                         | 27 |
| LMNA | CTLA4   | CTLA4,LMNA                        | 27 |
| LMNA | DDX3X   | DDX3X,LMNA                        | 27 |
| LMNA | EP300   | EP300,EZH2,GATA1,GATA3,LMNA,STAT3 | 27 |
| LMNA | EZH2    | EP300,EZH2,GATA1,GATA3,LMNA,STAT3 | 27 |
| LMNA | F2      | F2,LMNA                           | 27 |
| LMNA | F2RL1   | F2RL1,LMNA                        | 27 |
| LMNA | FLT3    | CAPN2,FLT3,LMNA                   | 27 |
| LMNA | GATA1   | EP300,EZH2,GATA1,GATA3,LMNA,STAT3 | 27 |
| LMNA | GATA3   | EP300,EZH2,GATA1,GATA3,LMNA,STAT3 | 27 |
| LMNA | IL23A   | IL23A,LMNA,STAT3                  | 27 |
| LMNA | IRAK1   | IRAK1,LMNA                        | 27 |
| LMNA | ISG15   | ISG15,LMNA                        | 27 |
| LMNA | MKI67   | LMNA,MKI67                        | 27 |
| LMNA | MRGPRX3 | LMNA,MRGPRX3                      | 27 |
| LMNA | MS4A1   | LMNA,MS4A1                        | 27 |
| LMNA | PHB2    | LMNA,PHB2                         | 27 |
| LMNA | PSIP1   | LMNA,PSIP1                        | 27 |
| LMNA | RB1     | LMNA,RB1                          | 27 |
| LMNA | SCYL1   | LMNA,SCYL1                        | 27 |
| LMNA | SLC35B2 | LMNA,SLC35B2                      | 27 |
| LMNA | SMC1A   | LMNA,SMC1A                        | 27 |
| LMNA | STAT3   | EP300,EZH2,GATA1,GATA3,LMNA,STAT3 | 27 |
| LMNA | STX4    | LMNA,STX4                         | 27 |
| LMNA | VAMP1   | LMNA,STX4,VAMP1                   | 27 |
| LMNA | WTAP    | LMNA,WTAP                         | 27 |
| GRB2 | ABL1    | ABL1,GRB2                         | 27 |
| GRB2 | BLNK    | BLNK,GRB2,PDGFRB                  | 27 |
| GRB2 | CASP2   | CASP2,GRB2                        | 27 |
| GRB2 | CD19    | CD19,CD22,CR2,GRB2                | 27 |
| GRB2 | CD22    | CD19,CD22,GRB2,PTPRC              | 27 |
| GRB2 | CD72    | BLNK,CD72,GRB2,PTPRC              | 27 |
| GRB2 | CD86    | CD86,GRB2,PTPRC                   | 27 |
| GRB2 | CDKN1B  | CDKN1B,GRB2                       | 27 |
| GRB2 | CR2     | CD19,CD22,CR2,GRB2                | 27 |
| GRB2 | CSF1R   | CSF1R,GRB2,PTPRC                  | 27 |
| GRB2 | CSF3    | CSF3,GRB2                         | 27 |
| GRB2 | CSPG4   | CSPG4,GRB2                        | 27 |

|       |          |                                 |    |
|-------|----------|---------------------------------|----|
| GRB2  | DLX4     | ABL1,DLX4,GRB2                  | 27 |
| GRB2  | DNM2     | DNM2,GRB2                       | 27 |
| GRB2  | DOK1     | ABL1,DOK1,GRB2                  | 27 |
| GRB2  | EGF      | EGF,GRB2                        | 27 |
| GRB2  | FLT1     | FLT1,GRB2                       | 27 |
| GRB2  | GC       | GC,GRB2                         | 27 |
| GRB2  | GHR      | GHR,GRB2,PTPRC                  | 27 |
| GRB2  | HSPA4    | GRB2,HSPA4                      | 27 |
| GRB2  | IL2RB    | GRB2,IL2RB                      | 27 |
| GRB2  | MAP4K1   | CDKN1B,GRB2,MAP4K1              | 27 |
| GRB2  | MME      | GRB2,MME                        | 27 |
| GRB2  | MYD88    | GRB2,MYD88                      | 27 |
| GRB2  | PDGFRB   | GRB2,PDGFRB,PTPRC               | 27 |
| GRB2  | PTPRC    | GRB2,PTPRC                      | 27 |
| GRB2  | RORA     | GRB2,RORA                       | 27 |
| GRB2  | SLC8A1   | GRB2,SLC8A1                     | 27 |
| GRB2  | SYNJ1    | GRB2,SYNJ1                      | 27 |
| GRB2  | TP73     | DNM2,GRB2,TP73                  | 27 |
| GRB2  | WNK2     | GRB2,WNK2                       | 27 |
| PRKCA | BAD      | BAD,PRKCA,SRC                   | 27 |
| PRKCA | BTK      | BTK,PRKCA                       | 27 |
| PRKCA | CBL      | CBL,LCK,PRKCA                   | 27 |
| PRKCA | CD4      | CD4,FCGR3A,LCK,PRKCA,PRKCQ,SELL | 27 |
| PRKCA | CXCR4    | CXCR4,GNAI1,PRKCA               | 27 |
| PRKCA | DCTN1    | DCTN1,PRKCA                     | 27 |
| PRKCA | DHRS9    | DHRS9,PRKCA                     | 27 |
| PRKCA | F2RL1    | F2RL1,PRKCA                     | 27 |
| PRKCA | FAS      | FAS,LCK,PRKCA                   | 27 |
| PRKCA | FCGR3A   | BTK,CD4,FCGR3A,LCK,PRKCA,SYK    | 27 |
| PRKCA | FOS      | FOS,GNAI1,PRKCA                 | 27 |
| PRKCA | GAPDH    | GAPDH,PRKCA,RAF1,SRC,SYK        | 27 |
| PRKCA | GNAI1    | FOS,GNAI1,PRKCA                 | 27 |
| PRKCA | LCK      | LCK,PRKCA                       | 27 |
| PRKCA | MUSK     | MUSK,PRKCA                      | 27 |
| PRKCA | PARP4    | PARP4,PRKCA,TERT                | 27 |
| PRKCA | PIM1     | BAD,CD4,PIM1,PRKCA              | 27 |
| PRKCA | PRKCQ    | PRKCA,PRKCQ                     | 27 |
| PRKCA | PTPN11   | LCK,PRKCA,PTPN11                | 27 |
| PRKCA | RAF1     | PRKCA,RAF1                      | 27 |
| PRKCA | RASGRP3  | PRKCA,PRKCQ,RASGRP3             | 27 |
| PRKCA | SELL     | CD4,PRKCA,PRKCQ,SELL            | 27 |
| PRKCA | SI       | PRKCA,SI                        | 27 |
| PRKCA | SLC9A3R1 | PRKCA,SLC9A3R1                  | 27 |

|       |       |             |    |
|-------|-------|-------------|----|
| PRKCA | SRC   | PRKCA,SRC   | 27 |
| PRKCA | SRF   | PRKCA,SRF   | 27 |
| PRKCA | SYK   | PRKCA,SYK   | 27 |
| PRKCA | TERT  | PRKCA,TERT  | 27 |
| PRKCA | TOP2A | PRKCA,TOP2A | 27 |
| PRKCA | VAMP2 | PRKCA,VAMP2 | 27 |

### **Sample 168**

| <b>Candidate AML genes</b> | <b>Known AML genes</b><br>(of which the module includes candidate AML genes) | <b>ALL the AML genes involved in current module</b>  | <b>Sample-ID</b> |
|----------------------------|------------------------------------------------------------------------------|------------------------------------------------------|------------------|
| FYN                        | ABL1                                                                         | ABL1,DNM2,EP300,FYN,MKI67                            | 168              |
| FYN                        | BAX                                                                          | BAX,BRAF,FYN                                         | 168              |
| FYN                        | BCL2                                                                         | BAX,BCL2,FYN,MAPK3                                   | 168              |
| FYN                        | BRAF                                                                         | BRAF,FYN                                             | 168              |
| FYN                        | BTK                                                                          | BTK,CBL,FYN                                          | 168              |
| FYN                        | C5                                                                           | C5,F2,FYN                                            | 168              |
| FYN                        | CARD11                                                                       | BTK,CARD11,CBL,FYN                                   | 168              |
| FYN                        | CBL                                                                          | CBL,CD2,CD4,CD79A,CD8A,FCGR3A,FYN,IFNAR1,RASA1       | 168              |
| FYN                        | CD14                                                                         | CD14,FYN                                             | 168              |
| FYN                        | CD2                                                                          | CBL,CD2,CD58,CD79A,CD8A,FCGR3A,FYN,IFNAR1,JAK2,RASA1 | 168              |
| FYN                        | CD4                                                                          | CBL,CD2,CD4,CD79A,CD8A,FCGR3A,FYN,IFNAR1,RASA1       | 168              |
| FYN                        | CD5                                                                          | CD2,CD4,CD5,CD58,CD79A,FYN,RASA1,ZAP70               | 168              |
| FYN                        | CD58                                                                         | CD2,CD4,CD5,CD58,FYN                                 | 168              |
| FYN                        | CD79A                                                                        | CBL,CD4,CD79A,FYN,IFNAR1,JAK2,RASA1                  | 168              |
| FYN                        | CD86                                                                         | CD4,CD86,CTLA4,FYN                                   | 168              |
| FYN                        | CD8A                                                                         | CD4,CD79A,CD8A,FYN,IFNAR1,JAK2,RASA1                 | 168              |
| FYN                        | CDH1                                                                         | CDH1,FYN,MAPK3                                       | 168              |
| FYN                        | CDK5                                                                         | CDK5,FYN                                             | 168              |
| FYN                        | CR2                                                                          | CD79A,CR2,FYN                                        | 168              |
| FYN                        | CSF1R                                                                        | CBL,CSF1R,FYN,RASA1                                  | 168              |
| FYN                        | CSF2RB                                                                       | CSF2RB,FYN,JAK2                                      | 168              |
| FYN                        | CTLA4                                                                        | CD86,CTLA4,FYN,JAK2                                  | 168              |
| FYN                        | DLX4                                                                         | ABL1,DLX4,FYN                                        | 168              |
| FYN                        | DNM2                                                                         | DNM2,EP300,FYN,MKI67                                 | 168              |
| FYN                        | DOK1                                                                         | ABL1,DOK1,FYN                                        | 168              |
| FYN                        | EP300                                                                        | DNM2,EP300,FYN,MKI67                                 | 168              |
| FYN                        | F2                                                                           | C5,F2,FYN                                            | 168              |
| FYN                        | FCGR3A                                                                       | CBL,CD79A,FCGR3A,FYN,IFNAR1,JAK2,RAS                 | 168              |

|      |         |                                                         |     |
|------|---------|---------------------------------------------------------|-----|
|      |         | A1                                                      |     |
| FYN  | FGFR2   | FGFR2,FYN                                               | 168 |
| FYN  | FLT1    | FLT1,FYN,KDR,VEGFA                                      | 168 |
| FYN  | FLT3    | ABL1,CBL,FLT3,FYN,RASA1                                 | 168 |
| FYN  | GUCY2D  | FYN,GUCY2D,HSPB1                                        | 168 |
| FYN  | HSPB1   | FYN,HSPB1                                               | 168 |
| FYN  | IFNAR1  | CBL,CD2,CD4,CD8A,FCGR3A,FYN,IFNAR1,JA<br>K2,RASA1       | 168 |
| FYN  | IL15    | FYN,IL15,IL2RB,IL2RG,JAK2,RAF1                          | 168 |
| FYN  | IL1B    | FYN,IL1B                                                | 168 |
| FYN  | IL2RB   | FYN,IL15,IL2RB,IL2RG,JAK2,RAF1                          | 168 |
| FYN  | IL2RG   | CDH1,FYN,IL2RG                                          | 168 |
| FYN  | IL5RA   | CSF2RB,FYN,IL5RA,JAK2                                   | 168 |
| FYN  | IL7R    | CBL,FYN,IL2RG,IL7R                                      | 168 |
| FYN  | ITGA4   | ABL1,FYN,ITGA4,TFRC                                     | 168 |
| FYN  | JAK2    | CBL,CD2,CD4,CD79A,CD8A,FCGR3A,FYN,IF<br>NAR1,JAK2,RASA1 | 168 |
| FYN  | KDR     | FLT1,FYN,KDR,VEGFA                                      | 168 |
| FYN  | LIFR    | FYN,LIFR                                                | 168 |
| FYN  | MAP4K1  | BRAF,FYN,MAP4K1,MAPK3,RAF1                              | 168 |
| FYN  | MAPK3   | CD4,FYN,MAPK3,RASA1                                     | 168 |
| FYN  | MKI67   | ABL1,EP300,FYN,MKI67                                    | 168 |
| FYN  | MPL     | ABL1,CBL,FYN,JAK2,MPL,RAF1                              | 168 |
| FYN  | PKIA    | FYN,PKIA                                                | 168 |
| FYN  | RAF1    | BRAF,FYN,RAF1                                           | 168 |
| FYN  | RAPGEF1 | ABL1,CBL,FYN,RAPGEF1                                    | 168 |
| FYN  | RASA1   | CBL,CD2,CD4,CD79A,CD8A,FCGR3A,FYN,IF<br>NAR1,RASA1      | 168 |
| FYN  | SPN     | FYN,SPN                                                 | 168 |
| FYN  | TFRC    | ABL1,FYN,TFRC                                           | 168 |
| FYN  | THY1    | FYN,THY1                                                | 168 |
| FYN  | VEGFA   | FYN,VEGFA                                               | 168 |
| FYN  | ZAP70   | FYN,ZAP70                                               | 168 |
| GRB2 | ABL1    | ABL1,DNM2,EP300,GRB2,MKI67                              | 168 |
| GRB2 | ASXL1   | ASXL1,GRB2                                              | 168 |
| GRB2 | BAD     | BAD,GRB2                                                | 168 |
| GRB2 | BCR     | ABL1,BCR,GRB2                                           | 168 |
| GRB2 | BLNK    | BLNK,ERBB4,GRB2,KIT,PDGFRB                              | 168 |
| GRB2 | CA2     | CA2,GRB2,KIT                                            | 168 |
| GRB2 | CASP2   | CASP2,GRB2                                              | 168 |
| GRB2 | CCR5    | CCR5,DNM2,GRB2                                          | 168 |
| GRB2 | CD19    | CD19,CD22,GRB2,INPP5D                                   | 168 |
| GRB2 | CD22    | CD19,CD22,GRB2                                          | 168 |

|      |         |                             |     |
|------|---------|-----------------------------|-----|
| GRB2 | CD72    | BLNK,CD72,GRB2              | 168 |
| GRB2 | CD86    | CD86,GRB2                   | 168 |
| GRB2 | CR2     | CD19,CD22,CR2,GRB2          | 168 |
| GRB2 | CSF1R   | CSF1R,GRB2,KIT              | 168 |
| GRB2 | CSF3    | CSF3,GRB2                   | 168 |
| GRB2 | DLX4    | ABL1,DLX4,GRB2              | 168 |
| GRB2 | DNM2    | DNM2,EP300,GRB2,MKI67       | 168 |
| GRB2 | DOK1    | ABL1,DOK1,GRB2,PTPN11       | 168 |
| GRB2 | EGR1    | EGR1,GRB2                   | 168 |
| GRB2 | EP300   | DNM2,EP300,GRB2,MKI67       | 168 |
| GRB2 | EPO     | EPO,EPOR,GRB2,KIT           | 168 |
| GRB2 | EPOR    | EPO,EPOR,GRB2,KIT           | 168 |
| GRB2 | ERBB4   | ABL1,ERBB4,GRB2             | 168 |
| GRB2 | EWSR1   | EWSR1,GRB2                  | 168 |
| GRB2 | FGFR2   | FGFR2,GRB2                  | 168 |
| GRB2 | FLT1    | FLT1,GRB2                   | 168 |
| GRB2 | FLT3    | ABL1,FLT3,GRB2              | 168 |
| GRB2 | GHR     | GHR,GRB2                    | 168 |
| GRB2 | IL15    | EGR1,GRB2,IL15,IL2RB        | 168 |
| GRB2 | IL2RB   | GRB2,IL15,IL2RB             | 168 |
| GRB2 | IL5RA   | BCR,EPOR,GRB2,IL5RA,KIT     | 168 |
| GRB2 | IL9R    | ABL1,GRB2,IL9R              | 168 |
| GRB2 | INPP5D  | CD22,GRB2,INPP5D            | 168 |
| GRB2 | KIT     | BLNK,GRB2,KIT,PDGFRB        | 168 |
| GRB2 | LIFR    | GRB2,LIFR                   | 168 |
| GRB2 | MAP4K1  | GRB2,MAP4K1                 | 168 |
| GRB2 | MKI67   | ABL1,EP300,GRB2,MKI67       | 168 |
| GRB2 | MPL     | ABL1,GRB2,MPL               | 168 |
| GRB2 | MYH11   | GRB2,MYH11                  | 168 |
| GRB2 | NME2    | ERBB4,GRB2,NME2             | 168 |
| GRB2 | PDGFRB  | GRB2,KIT,PDGFRB             | 168 |
| GRB2 | PTPN11  | DNM2,GRB2,PDGFRB,PTPN11     | 168 |
| GRB2 | RAPGEF1 | ABL1,GRB2,RAPGEF1           | 168 |
| GRB2 | SLC8A1  | GRB2,SLC8A1                 | 168 |
| GRB2 | SOCS1   | GRB2,SOCS1                  | 168 |
| GRB2 | SYNJ1   | GRB2,SYNJ1                  | 168 |
| GRB2 | TF      | GRB2,TF                     | 168 |
| GRB2 | WNK2    | GRB2,WNK2                   | 168 |
| GRB2 | ZAP70   | ERBB4,GRB2,ZAP70            | 168 |
| LYN  | ANGPT1  | ANGPT1,ANGPT2,LYN,PTPRC,TEK | 168 |
| LYN  | ANGPT2  | ANGPT1,ANGPT2,LYN,TEK       | 168 |
| LYN  | BCL2    | BCL2,LYN                    | 168 |
| LYN  | CARD11  | CARD11,LYN,PRKCQ            | 168 |

|      |          |                                               |     |
|------|----------|-----------------------------------------------|-----|
| LYN  | CASP9    | CASP9,LYN                                     | 168 |
| LYN  | CD2      | CD2,CD22,CD79A,CD8A,FCGR3A,LYN,PTPRC,<br>,SRC | 168 |
| LYN  | CD22     | CD22,LYN,PIK3R1,PTPRC                         | 168 |
| LYN  | CD36     | CD36,CD9,LYN,SRC                              | 168 |
| LYN  | CD72     | CD72,LYN,PTPRC                                | 168 |
| LYN  | CD79A    | CD22,CD79A,LYN,PTPRC,SRC                      | 168 |
| LYN  | CD8A     | CD22,CD79A,CD8A,LYN,PTPRC,SRC                 | 168 |
| LYN  | CD9      | CD36,CD9,LYN,SRC                              | 168 |
| LYN  | CSF2RB   | CSF2RB,LYN,PIK3R1,PTPRC                       | 168 |
| LYN  | CSF3     | CSF3,LYN                                      | 168 |
| LYN  | CTLA4    | CTLA4,LYN,PIK3R1                              | 168 |
| LYN  | DOK1     | DOK1,DOK2,LYN,PIK3R1,SRC                      | 168 |
| LYN  | DOK2     | DOK2,LYN,SRC                                  | 168 |
| LYN  | ERBB4    | ERBB4,LYN,SRC                                 | 168 |
| LYN  | EWSR1    | EWSR1,LYN,SRC                                 | 168 |
| LYN  | FCGR3A   | CD22,CD79A,FCGR3A,LYN,PTPRC,SRC               | 168 |
| LYN  | FGR      | FGR,LYN                                       | 168 |
| LYN  | FLT3     | FLT3,LYN,PIK3R1,SRC                           | 168 |
| LYN  | IL1B     | IL1B,LYN                                      | 168 |
| LYN  | IL2RB    | IL2RB,LYN,PIK3R1                              | 168 |
| LYN  | IL5RA    | CSF2RB,IL5RA,LYN,PIK3R1                       | 168 |
| LYN  | IL6      | IL6,IL6ST,LYN                                 | 168 |
| LYN  | IL6ST    | IL6,IL6ST,LIF,LYN                             | 168 |
| LYN  | IL7R     | IL7R,LYN,PIK3R1                               | 168 |
| LYN  | INPP5D   | CD22,DOK2,INPP5D,LYN,PIK3R1                   | 168 |
| LYN  | ITGB2    | ITGB2,LYN                                     | 168 |
| LYN  | LIF      | IL6,IL6ST,LIF,LYN                             | 168 |
| LYN  | MME      | CD9,LYN,MME                                   | 168 |
| LYN  | MPL      | LYN,MPL,SRC                                   | 168 |
| LYN  | NME2     | ERBB4,LYN,NME2                                | 168 |
| LYN  | PIK3R1   | LYN,PIK3R1,SRC                                | 168 |
| LYN  | PRKCQ    | LYN,PRKCQ                                     | 168 |
| LYN  | PTPRC    | CD22,CD79A,LYN,PTPRC,SRC                      | 168 |
| LYN  | SRC      | LYN,PIK3R1,SRC                                | 168 |
| LYN  | TEK      | ANGPT1,ANGPT2,LYN,PIK3R1,TEK                  | 168 |
| LYN  | TNFSF13B | LYN,TNFSF13B                                  | 168 |
| RELA | AATF     | AATF,RELA                                     | 168 |
| RELA | AFF1     | AFF1,MLLT1,NSD1,RELA,VDR                      | 168 |
| RELA | ATM      | ATM,RELA,SOCS1                                | 168 |
| RELA | BCL2L11  | BCL2L11,DIABLO,RARA,RELA                      | 168 |
| RELA | BTK      | BCL2L11,BTK,RELA                              | 168 |
| RELA | CASP1    | CASP1,RELA                                    | 168 |

|       |          |                                    |     |
|-------|----------|------------------------------------|-----|
| RELA  | CASP8    | CASP8,PARP1,RELA,SET               | 168 |
| RELA  | CDX2     | CDX2,RELA                          | 168 |
| RELA  | CEBPB    | CEBPB,RELA,STAT6                   | 168 |
| RELA  | CXCR4    | CXCR4,RELA                         | 168 |
| RELA  | CYP24A1  | CYP24A1,RELA                       | 168 |
| RELA  | DIABLO   | DIABLO,RELA                        | 168 |
| RELA  | ELF4     | ELF4,RELA,SET                      | 168 |
| RELA  | IL1B     | IL1B,IRF8,RELA                     | 168 |
| RELA  | IL7R     | IL7R,RELA,SOCS1                    | 168 |
| RELA  | IRF8     | IL1B,IRF8,RELA                     | 168 |
| RELA  | MLLT1    | AFF1,MLLT1,NSD1,RELA,VDR           | 168 |
| RELA  | NCOA6    | NCOA6,NR3C1,PPARGC1A,RELA,RXRA,VDR | 168 |
| RELA  | NEUROD1  | NEUROD1,RELA                       | 168 |
| RELA  | NFKBIB   | NFKBIB,RELA                        | 168 |
| RELA  | NR3C1    | BCL2L11,DIABLO,NR3C1,RELA          | 168 |
| RELA  | NR4A1    | NR4A1,RELA,RXRA                    | 168 |
| RELA  | NSD1     | AFF1,MLLT1,NSD1,RELA               | 168 |
| RELA  | PARP1    | PARP1,PBX1,RELA,RXRA,VDR           | 168 |
| RELA  | PBX1     | PARP1,PBX1,RELA,RXRA               | 168 |
| RELA  | PGR      | PGR,RELA,STAT5A                    | 168 |
| RELA  | PIK3CA   | PIK3CA,RELA                        | 168 |
| RELA  | PPARGC1A | NR3C1,PPARGC1A,RELA,RXRA           | 168 |
| RELA  | PSMC3    | PSMC3,RELA                         | 168 |
| RELA  | RARA     | BCL2L11,DIABLO,RARA,RELA           | 168 |
| RELA  | RPL5     | CASP8,PARP1,RELA,RPL5,SET          | 168 |
| RELA  | RXRA     | PARP1,PBX1,RELA,RXRA               | 168 |
| RELA  | SET      | CASP8,PARP1,RELA,SET               | 168 |
| RELA  | SOCS1    | RELA,SOCS1                         | 168 |
| RELA  | STAT5A   | CEBPB,NR3C1,RELA,STAT5A            | 168 |
| RELA  | STAT6    | CEBPB,RELA,STAT6                   | 168 |
| RELA  | TERT     | RELA,TERT                          | 168 |
| RELA  | VDR      | RELA,RXRA,VDR                      | 168 |
| HDAC1 | AFF1     | AFF1,HDAC1,MLLT1                   | 168 |
| HDAC1 | BCL11B   | BCL11B,HDAC1,JUN                   | 168 |
| HDAC1 | BCL3     | BCL3,HDAC1                         | 168 |
| HDAC1 | BCOR     | BCOR,HDAC1,JUN                     | 168 |
| HDAC1 | CBFB     | CBFB,HDAC1,MLLT1,RARA              | 168 |
| HDAC1 | CDK1     | CDK1,CREBBP,HDAC1,JUN,PML          | 168 |
| HDAC1 | CDX2     | CDX2,CREBBP,HDAC1                  | 168 |
| HDAC1 | CREB1    | CREB1,HDAC1                        | 168 |
| HDAC1 | CREBBP   | CREB1,CREBBP,HDAC1,JUN             | 168 |
| HDAC1 | DNTT     | DNTT,HDAC1                         | 168 |
| HDAC1 | ELF4     | ELF4,HDAC1,PML                     | 168 |

|       |        |                               |     |
|-------|--------|-------------------------------|-----|
| HDAC1 | EZH2   | EZH2,GATA1,GATA3,HDAC1        | 168 |
| HDAC1 | FHIT   | FHIT,HDAC1                    | 168 |
| HDAC1 | FOS    | CREBBP,FOS,HDAC1,JUN,PML,TP73 | 168 |
| HDAC1 | GATA1  | EZH2,GATA1,GATA3,HDAC1        | 168 |
| HDAC1 | GATA3  | EZH2,GATA1,GATA3,HDAC1        | 168 |
| HDAC1 | HDAC9  | HDAC1,HDAC9,JUN               | 168 |
| HDAC1 | JUN    | HDAC1,HDAC9,JUN               | 168 |
| HDAC1 | MAPK8  | HDAC1,HDAC9,JUN,MAPK8         | 168 |
| HDAC1 | MEIS1  | CREBBP,HDAC1,MEIS1,PBX1       | 168 |
| HDAC1 | MLLT1  | AFF1,HDAC1,MLLT1              | 168 |
| HDAC1 | NFE2   | HDAC1,NFE2,RARA               | 168 |
| HDAC1 | NR3C1  | CREBBP,HDAC1,JUN,NR3C1        | 168 |
| HDAC1 | PBX1   | HDAC1,PBX1                    | 168 |
| HDAC1 | PFDN4  | HDAC1,PFDN4                   | 168 |
| HDAC1 | PML    | CREBBP,HDAC1,JUN,PML,TP73     | 168 |
| HDAC1 | RARA   | CREBBP,HDAC1,JUN,RARA         | 168 |
| HDAC1 | SALL4  | EZH2,HDAC1,SALL4              | 168 |
| HDAC1 | SAMSN1 | HDAC1,SAMSN1                  | 168 |
| HDAC1 | TOP2B  | HDAC1,TOP2B                   | 168 |
| HDAC1 | TP73   | CREBBP,HDAC1,JUN,PML,TP73     | 168 |

### **Sample 270**

| <b>Candidate AML genes</b> | <b>Known AML genes</b><br>(of which the module includes candidate AML genes) | <b>ALL the AML genes involved in current module</b> | <b>Sample-ID</b> |
|----------------------------|------------------------------------------------------------------------------|-----------------------------------------------------|------------------|
| FYN                        | ANPEP                                                                        | ANPEP,FYN                                           | 270              |
| FYN                        | BCOR                                                                         | BCOR,FYN                                            | 270              |
| FYN                        | BTK                                                                          | BTK,CD19,FYN                                        | 270              |
| FYN                        | C5                                                                           | C5,F2,FYN                                           | 270              |
| FYN                        | CARD11                                                                       | CARD11,FYN                                          | 270              |
| FYN                        | CASP8                                                                        | CASP8,FYN                                           | 270              |
| FYN                        | CASP9                                                                        | CASP9,FYN,MAPK3,RASA1                               | 270              |
| FYN                        | CD19                                                                         | CD19,CD22,FYN                                       | 270              |
| FYN                        | CD2                                                                          | CD2,CD5,CD58,FYN,LCK                                | 270              |
| FYN                        | CD22                                                                         | BTK,CD19,CD22,CD79A,FYN                             | 270              |
| FYN                        | CD5                                                                          | CD2,CD5,CD58,CD72,CD79A,FYN,LCK,RASA1               | 270              |
| FYN                        | CD58                                                                         | CD2,CD5,CD58,FYN,LCK                                | 270              |
| FYN                        | CD72                                                                         | CD2,CD5,CD72,CD79A,FYN,LCK,RASA1                    | 270              |
| FYN                        | CD79A                                                                        | CD19,CD79A,FYN                                      | 270              |
| FYN                        | CD86                                                                         | CD86,CTLA4,FYN,LCK                                  | 270              |
| FYN                        | CDH1                                                                         | CDH1,FYN                                            | 270              |



|      |           |                           |     |
|------|-----------|---------------------------|-----|
| FYN  | CRKL      | CRKL,DNM2,FYN             | 270 |
| FYN  | CSF1R     | CSF1R,FYN,RASA1           | 270 |
| FYN  | CTLA4     | CD86,CTLA4,FYN,LCK        | 270 |
| FYN  | DLX4      | DLX4,FYN                  | 270 |
| FYN  | DNM2      | DNM2,FYN                  | 270 |
| FYN  | DOK1      | CRKL,DOK1,FYN             | 270 |
| FYN  | DOK2      | CRKL,DOK2,FYN             | 270 |
| FYN  | EDN1      | EDN1,FYN                  | 270 |
| FYN  | F2        | C5,F2,FYN                 | 270 |
| FYN  | FLT3      | CRKL,FLT3,FYN,KITLG,RASA1 | 270 |
| FYN  | GUCY2D    | FYN,GUCY2D                | 270 |
| FYN  | IL15      | FYN,IL15,IL2RA,IL2RB,LCK  | 270 |
| FYN  | IL2RA     | FYN,IL15,IL2RA,IL2RB,LCK  | 270 |
| FYN  | IL2RB     | FYN,IL15,IL2RA,IL2RB      | 270 |
| FYN  | IL5RA     | FYN,IL5RA                 | 270 |
| FYN  | IL7R      | FYN,IL2RB,IL7R            | 270 |
| FYN  | KITLG     | CRKL,FLT3,FYN,IL7R,KITLG  | 270 |
| FYN  | LCK       | CDH1,DNM2,FYN,LCK         | 270 |
| FYN  | LIFR      | FYN,LIFR                  | 270 |
| FYN  | MAPK3     | FYN,MAPK3,RASA1           | 270 |
| FYN  | MBP       | FYN,MBP                   | 270 |
| FYN  | MPL       | FYN,MPL                   | 270 |
| FYN  | MRC2      | CASP8,FYN,MRC2            | 270 |
| FYN  | NCAM1     | FYN,NCAM1                 | 270 |
| FYN  | PTPRT     | FYN,PTPRT                 | 270 |
| FYN  | RASA1     | FYN,MAPK3,RASA1           | 270 |
| FYN  | SNCA      | FYN,MAPK3,SNCA            | 270 |
| FYN  | SPN       | FYN,SPN                   | 270 |
| FYN  | TGOLN2    | FYN,TGOLN2                | 270 |
| FYN  | THY1      | FYN,LCK,THY1              | 270 |
| FYN  | TNFRSF10B | FYN,TNFRSF10B             | 270 |
| FYN  | VEGFA     | FYN,VEGFA                 | 270 |
| ESR1 | ABCC1     | ABCC1,ESR1                | 270 |
| ESR1 | ACTBL2    | ACTBL2,ESR1               | 270 |
| ESR1 | APEX1     | APEX1,ESR1                | 270 |
| ESR1 | BCL3      | BCL3,ESR1,TBL1XR1         | 270 |
| ESR1 | BLNK      | BLNK,ESR1                 | 270 |
| ESR1 | BRAF      | BRAF,ESR1                 | 270 |
| ESR1 | CDH1      | CDH1,ESR1                 | 270 |
| ESR1 | CDK1      | CDK1,ESR1                 | 270 |
| ESR1 | CNTN2     | CNTN2,ESR1,NCAM1          | 270 |
| ESR1 | DNTT      | DNTT,ESR1                 | 270 |
| ESR1 | EDNRA     | EDNRA,ESR1                | 270 |

|      |          |                              |     |
|------|----------|------------------------------|-----|
| ESR1 | EPM2A    | EPM2A,ESR1                   | 270 |
| ESR1 | FBXW7    | ESR1,FBXW7                   | 270 |
| ESR1 | FUBP1    | ESR1,FUBP1                   | 270 |
| ESR1 | HLA-G    | ESR1,HLA-G                   | 270 |
| ESR1 | HSPA4L   | ESR1,HSPA4L                  | 270 |
| ESR1 | JAK1     | ESR1,JAK1                    | 270 |
| ESR1 | JAK2     | ESR1,JAK1,JAK2,RET           | 270 |
| ESR1 | JUP      | CDH1,ESR1,JUP                | 270 |
| ESR1 | LCK      | CDH1,ESR1,LCK                | 270 |
| ESR1 | MAPKAPK2 | ESR1,MAPKAPK2                | 270 |
| ESR1 | MERTK    | ESR1,MERTK                   | 270 |
| ESR1 | MPL      | ESR1,JAK2,MPL                | 270 |
| ESR1 | MSH2     | ESR1,MSH2                    | 270 |
| ESR1 | MSH6     | ESR1,MSH6                    | 270 |
| ESR1 | MVP      | ESR1,MVP                     | 270 |
| ESR1 | NCAM1    | CNTN2,ESR1,NCAM1             | 270 |
| ESR1 | NOS3     | ESR1,NOS3                    | 270 |
| ESR1 | NPPA     | ESR1,NPPA                    | 270 |
| ESR1 | PACSIN3  | ESR1,PACSIN3                 | 270 |
| ESR1 | PHB2     | ESR1,PHB2                    | 270 |
| ESR1 | PPP2R3A  | ESR1,PPP2R3A                 | 270 |
| ESR1 | PTPRT    | ESR1,JAK1,MSH2,PTPRT         | 270 |
| ESR1 | RAG2     | CDH1,ESR1,RAG2,SKP2          | 270 |
| ESR1 | RET      | ESR1,RET                     | 270 |
| ESR1 | RORA     | ESR1,RORA                    | 270 |
| ESR1 | ROS1     | CDH1,ESR1,JAK2,ROS1          | 270 |
| ESR1 | RPL19    | ESR1,RPL19                   | 270 |
| ESR1 | SETBP1   | ESR1,PPP2R3A,SETBP1          | 270 |
| ESR1 | SKP2     | ESR1,JAK2,SKP2               | 270 |
| ESR1 | STAT6    | ESR1,JAK1,STAT6              | 270 |
| ESR1 | TBL1XR1  | ESR1,TBL1XR1                 | 270 |
| ESR1 | TET1     | ESR1,MSH2,MSH6,RORA,TET1     | 270 |
| ESR1 | TOP2A    | ESR1,TOP2A                   | 270 |
| ESR1 | XIAP     | ESR1,XIAP                    | 270 |
| GRB2 | ASXL1    | ASXL1,GRB2                   | 270 |
| GRB2 | BCR      | BCR,CRKL,GRB2                | 270 |
| GRB2 | BLNK     | BLNK,CD72,GRB2               | 270 |
| GRB2 | BTK      | BTK,CD19,GRB2                | 270 |
| GRB2 | CD19     | CD19,CD22,CR2,GRB2,PTPRC     | 270 |
| GRB2 | CD22     | BTK,CD19,CD22,CR2,GRB2,PTPRC | 270 |
| GRB2 | CD72     | BLNK,CD72,GRB2               | 270 |
| GRB2 | CD86     | CD86,GRB2,PTPRC              | 270 |
| GRB2 | CDKN1B   | CDKN1B,GRB2                  | 270 |

|        |        |                                  |     |
|--------|--------|----------------------------------|-----|
| GRB2   | CLPB   | CLPB,GRB2                        | 270 |
| GRB2   | CR2    | CD19,CR2,GRB2                    | 270 |
| GRB2   | CRKL   | CRKL,DNM2,GRB2                   | 270 |
| GRB2   | CSF1R  | CSF1R,GRB2                       | 270 |
| GRB2   | CSF2RB | CSF2RB,EPO,EPOR,GRB2,KITLG,PTPRC | 270 |
| GRB2   | CSF3   | CSF3,GRB2                        | 270 |
| GRB2   | DLX4   | DLX4,GRB2                        | 270 |
| GRB2   | DNM2   | DNM2,GRB2                        | 270 |
| GRB2   | EGF    | EGF,GRB2                         | 270 |
| GRB2   | EPO    | CSF2RB,EPO,EPOR,GRB2,KITLG,PTPRC | 270 |
| GRB2   | EPOR   | CSF2RB,EPOR,GRB2,KITLG,PTPRC     | 270 |
| GRB2   | FLT3   | CRKL,FLT3,GRB2,KITLG             | 270 |
| GRB2   | GC     | GC,GRB2,TF                       | 270 |
| GRB2   | GFAP   | GFAP,GRB2                        | 270 |
| GRB2   | GHR    | GHR,GRB2,PTPRC                   | 270 |
| GRB2   | IL15   | GRB2,IL15,IL2RA,IL2RB,IL2RG      | 270 |
| GRB2   | IL2RA  | GRB2,IL15,IL2RA,IL2RB,IL2RG      | 270 |
| GRB2   | IL2RB  | GRB2,IL15,IL2RA,IL2RB,IL2RG      | 270 |
| GRB2   | IL2RG  | GRB2,IL2RB,IL2RG,MERTK           | 270 |
| GRB2   | IL5RA  | BCR,CSF2RB,EPOR,GRB2,IL5RA       | 270 |
| GRB2   | ITGA4  | DNM2,GRB2,ITGA4                  | 270 |
| GRB2   | KDR    | GRB2,KDR                         | 270 |
| GRB2   | KITLG  | CRKL,EPOR,FLT3,GRB2,KITLG        | 270 |
| GRB2   | LIFR   | GRB2,LIFR                        | 270 |
| GRB2   | MERTK  | GRB2,IL2RG,MERTK                 | 270 |
| GRB2   | NCOA6  | GRB2,NCOA6                       | 270 |
| GRB2   | NISCH  | GRB2,NISCH                       | 270 |
| GRB2   | PTPRC  | CD86,GRB2,PTPRC                  | 270 |
| GRB2   | ROS1   | GRB2,ROS1                        | 270 |
| GRB2   | SI     | GRB2,SI                          | 270 |
| GRB2   | TF     | GRB2,TF                          | 270 |
| GRB2   | WNK2   | GRB2,WNK2                        | 270 |
| PRKACA | ABL1   | ABL1,HRAS,MAPK1,PRKACA           | 270 |
| PRKACA | ATP2A2 | ATP2A2,CA2,CFTR,PRKACA           | 270 |
| PRKACA | B3GAT1 | B3GAT1,HRAS,PRKACA               | 270 |
| PRKACA | BAD    | BAD,PRKACA                       | 270 |
| PRKACA | BIRC3  | BIRC3,GAPDH,PRKACA               | 270 |
| PRKACA | BRAF   | BRAF,KRAS,MAPK1,PRKACA           | 270 |
| PRKACA | CA2    | ATP2A2,CA2,PRKACA                | 270 |
| PRKACA | CAD    | CAD,PRKACA                       | 270 |
| PRKACA | CAV1   | ABL1,CAV1,CFTR,MAPK1,PRKACA      | 270 |
| PRKACA | CDK2   | CDK2,HRAS,MAPK1,PIK3R1,PRKACA    | 270 |
| PRKACA | CFTR   | CFTR,PRKACA                      | 270 |

|        |           |                                                                |     |
|--------|-----------|----------------------------------------------------------------|-----|
| PRKACA | CLTC      | CFTR,CLTC,PRKACA                                               | 270 |
| PRKACA | CRABP1    | CRABP1,MAPK1,PRKACA                                            | 270 |
| PRKACA | GAPDH     | GAPDH,MAPK1,PRKACA                                             | 270 |
| PRKACA | GFAP      | GFAP,PRKACA                                                    | 270 |
| PRKACA | HIF1A     | HIF1A,PRKACA                                                   | 270 |
| PRKACA | HNFA4     | HNFA4,PRKACA                                                   | 270 |
| PRKACA | HRAS      | CDK2,HRAS,MAPK1,PIK3R1,PRKACA                                  | 270 |
| PRKACA | HSPA4     | CFTR,HSPA4,PRKACA                                              | 270 |
| PRKACA | HSPA8     | HSPA8,PRKACA                                                   | 270 |
| PRKACA | IFNAR1    | IFNAR1,MAPK1,PRKACA                                            | 270 |
| PRKACA | ITGA4     | ITGA4,PRKACA                                                   | 270 |
| PRKACA | KRAS      | HRAS,KRAS,MAPK1,PRKACA                                         | 270 |
| PRKACA | LRP1      | LRP1,PRKACA                                                    | 270 |
| PRKACA | MAPK1     | CDK2,HRAS,MAPK1,PIK3R1,PRKACA                                  | 270 |
| PRKACA | MAT1A     | CDK2,MAT1A,PRKACA,XPO1                                         | 270 |
| PRKACA | MDM2      | CFTR,MDM2,PRKACA                                               | 270 |
| PRKACA | NR3C1     | MAPK1,NR3C1,PRKACA                                             | 270 |
| PRKACA | PCNA      | CDK2,HRAS,MAPK1,PCNA,PIK3R1,PRKACA                             | 270 |
| PRKACA | PIK3R1    | CDK2,HRAS,MAPK1,PIK3R1,PRKACA                                  | 270 |
| PRKACA | PKIA      | CDK2,HSPA4,IFNAR1,ITGA4,NR3C1,PIK3R1,P<br>KIA,PRKACA,RAF1,XPO1 | 270 |
| PRKACA | PTK2B     | PRKACA,PTK2B                                                   | 270 |
| PRKACA | RAF1      | CFTR,PRKACA,RAF1                                               | 270 |
| PRKACA | RASGRP3   | HRAS,PRKACA,RASGRP3                                            | 270 |
| PRKACA | TNFRSF10B | PRKACA,TNFRSF10B                                               | 270 |
| PRKACA | TYMS      | KRAS,PRKACA,TYMS                                               | 270 |
| PRKACA | XPO1      | PRKACA,XPO1                                                    | 270 |
| HDAC1  | AFF1      | AFF1,HDAC1                                                     | 270 |
| HDAC1  | APEX1     | APEX1,HDAC1                                                    | 270 |
| HDAC1  | BCL11B    | BCL11B,HDAC1                                                   | 270 |
| HDAC1  | BCL3      | BCL3,HDAC1                                                     | 270 |
| HDAC1  | CDCA7L    | CDCA7L,HDAC1,HOXA9                                             | 270 |
| HDAC1  | CDK1      | CDK1,EZH2,HDAC1                                                | 270 |
| HDAC1  | CDKN1B    | CDKN1B,DIABLO,HDAC1,MAPK8                                      | 270 |
| HDAC1  | CHFR      | CHFR,HDAC1                                                     | 270 |
| HDAC1  | DIABLO    | CDKN1B,DIABLO,HDAC1                                            | 270 |
| HDAC1  | DNMT1     | DNMT1,HDAC1                                                    | 270 |
| HDAC1  | DNTT      | DNTT,HDAC1                                                     | 270 |
| HDAC1  | EZH2      | EZH2,GATA1,HDAC1                                               | 270 |
| HDAC1  | FBXW7     | FBXW7,HDAC1                                                    | 270 |
| HDAC1  | FLI1      | FLI1,HDAC1,PML                                                 | 270 |
| HDAC1  | FOXP3     | FOXP3,HDAC1,HDAC9                                              | 270 |
| HDAC1  | GATA1     | EZH2,GATA1,GATA3,HDAC1                                         | 270 |

|         |         |                                       |     |
|---------|---------|---------------------------------------|-----|
| HDAC1   | GATA3   | EZH2,GATA1,GATA3,HDAC1,MAPK14         | 270 |
| HDAC1   | HDAC9   | HDAC1,HDAC9                           | 270 |
| HDAC1   | HIF1A   | HDAC1,HIF1A                           | 270 |
| HDAC1   | HOXA9   | CDCA7L,HDAC1,HOXA9                    | 270 |
| HDAC1   | IDH2    | HDAC1,IDH2                            | 270 |
| HDAC1   | LYL1    | HDAC1,LYL1                            | 270 |
| HDAC1   | MAPK14  | HDAC1,HDAC9,MAPK14                    | 270 |
| HDAC1   | MAPK8   | HDAC1,HDAC9,MAPK8                     | 270 |
| HDAC1   | MEIS1   | CDCA7L,HDAC1,HOXA9,MEIS1              | 270 |
| HDAC1   | NEUROD1 | GATA3,HDAC1,NEUROD1                   | 270 |
| HDAC1   | NR3C1   | HDAC1,NR3C1                           | 270 |
| HDAC1   | PFDN4   | HDAC1,PFDN4                           | 270 |
| HDAC1   | PHF6    | HDAC1,PHF6                            | 270 |
| HDAC1   | PML     | HDAC1,PML                             | 270 |
| HDAC1   | RUNX1T1 | HDAC1,RUNX1T1                         | 270 |
| HDAC1   | SALL4   | EZH2,HDAC1,SALL4                      | 270 |
| HDAC1   | SAMSN1  | HDAC1,IDH2,SAMSN1,SYK                 | 270 |
| HDAC1   | SPI1    | HDAC1,MAPK8,SPI1                      | 270 |
| HDAC1   | SYK     | HDAC1,HDAC9,SYK                       | 270 |
| HDAC1   | ZBTB16  | HDAC1,HDAC9,ZBTB16                    | 270 |
| HDAC1   | ZMYM3   | HDAC1,ZMYM3                           | 270 |
| SMARCA4 | ARID1A  | ARID1A,ARID1B,SMARCA4                 | 270 |
| SMARCA4 | ARID1B  | ARID1A,ARID1B,SMARCA4                 | 270 |
| SMARCA4 | CDCA7L  | CDCA7L,HOXA9,PBX1,SMARCA4             | 270 |
| SMARCA4 | CDX2    | CDX2,SMARCA4                          | 270 |
| SMARCA4 | CEBPB   | CEBPB,SMARCA4                         | 270 |
| SMARCA4 | CHFR    | CHFR,PARP1,SMARCA4                    | 270 |
| SMARCA4 | CREB1   | CREB1,SMARCA4                         | 270 |
| SMARCA4 | EED     | EED,SMARCA4,SUZ12                     | 270 |
| SMARCA4 | FANCA   | FANCA,SMARCA4                         | 270 |
| SMARCA4 | FBXW7   | FBXW7,SMARCA4                         | 270 |
| SMARCA4 | FLI1    | CEBPB,FLI1,PML,SMARCA4                | 270 |
| SMARCA4 | GATA1   | GATA1,SMARCA4                         | 270 |
| SMARCA4 | HIF1A   | HIF1A,RUNX1,SMARCA4                   | 270 |
| SMARCA4 | HOXA9   | CDCA7L,HOXA9,PBX1,SMARCA4             | 270 |
| SMARCA4 | JUNB    | JUNB,SMARCA4                          | 270 |
| SMARCA4 | KLF4    | KLF4,SMARCA4                          | 270 |
| SMARCA4 | MAPK8   | MAPK8,SMARCA4                         | 270 |
| SMARCA4 | MEIS1   | CDCA7L,CREB1,HOXA9,MEIS1,PBX1,SMARCA4 | 270 |
| SMARCA4 | NEUROD1 | NEUROD1,SMARCA4                       | 270 |
| SMARCA4 | NF1     | NF1,SMARCA4                           | 270 |
| SMARCA4 | NR3C1   | CREB1,NR3C1,SMARCA4                   | 270 |

|         |         |                                  |     |
|---------|---------|----------------------------------|-----|
| SMARCA4 | PARP1   | PARP1,SMARCA4                    | 270 |
| SMARCA4 | PBX1    | NR3C1,PBX1,SMARCA4               | 270 |
| SMARCA4 | PML     | PML,SMARCA4                      | 270 |
| SMARCA4 | PPARG   | PPARG,SMARCA4                    | 270 |
| SMARCA4 | RUNX1   | RUNX1,SMARCA4,ZBTB16             | 270 |
| SMARCA4 | RXRA    | RXRA,SMARCA4                     | 270 |
| SMARCA4 | SFPQ    | RUNX1,SFPQ,SMARCA4               | 270 |
| SMARCA4 | STAT5A  | CEBPB,SMARCA4,STAT5A             | 270 |
| SMARCA4 | SUZ12   | EED,SMARCA4,SUZ12                | 270 |
| SMARCA4 | SYK     | SMARCA4,SYK                      | 270 |
| SMARCA4 | TERT    | SMARCA4,TERT                     | 270 |
| SMARCA4 | TOP2A   | SMARCA4,TOP2A                    | 270 |
| SMARCA4 | TOP2B   | PARP1,SMARCA4,TOP2A,TOP2B        | 270 |
| SMARCA4 | ZBTB16  | RXRA,SMARCA4,ZBTB16              | 270 |
| SHC1    | AMD1    | AMD1,SHC1                        | 270 |
| SHC1    | ANGPT1  | ANGPT1,CSF1R,SHC1                | 270 |
| SHC1    | BCR     | BCR,SHC1                         | 270 |
| SHC1    | CD19    | CD19,SHC1                        | 270 |
| SHC1    | CLPB    | CLPB,IGF1R,SHC1                  | 270 |
| SHC1    | CSF1R   | CSF1R,SHC1                       | 270 |
| SHC1    | CTLA4   | CTLA4,JAK2,PTPN11,SHC1           | 270 |
| SHC1    | DOK1    | DOK1,SHC1                        | 270 |
| SHC1    | DOK2    | DOK2,SHC1                        | 270 |
| SHC1    | EGF     | EGF,SHC1                         | 270 |
| SHC1    | EPO     | EPO,JAK2,SHC1                    | 270 |
| SHC1    | FCGR3A  | FCGR3A,SHC1,ZAP70                | 270 |
| SHC1    | FGFR2   | FGFR2,SHC1                       | 270 |
| SHC1    | FLT3    | FLT3,SHC1                        | 270 |
| SHC1    | GHR     | GHR,IGF1R,SHC1                   | 270 |
| SHC1    | IGF1R   | IGF1R,SHC1                       | 270 |
| SHC1    | IL15    | IL15,IL2RA,IL2RB,IL2RG,JAK2,SHC1 | 270 |
| SHC1    | IL2RA   | IL15,IL2RA,IL2RB,IL2RG,JAK2,SHC1 | 270 |
| SHC1    | IL2RB   | IL15,IL2RA,IL2RB,IL2RG,SHC1      | 270 |
| SHC1    | IL2RG   | IL2RB,IL2RG,MERTK,SHC1           | 270 |
| SHC1    | IL4R    | IL2RG,IL4R,SHC1                  | 270 |
| SHC1    | JAK2    | IGF1R,JAK2,SHC1                  | 270 |
| SHC1    | KDR     | KDR,SHC1                         | 270 |
| SHC1    | MAT1A   | MAT1A,MAT2A,SHC1                 | 270 |
| SHC1    | MAT2A   | MAT1A,MAT2A,SHC1                 | 270 |
| SHC1    | MERTK   | IL2RG,MERTK,SHC1                 | 270 |
| SHC1    | MPL     | IGF1R,JAK2,MPL,SHC1              | 270 |
| SHC1    | PTPN11  | PTPN11,SHC1                      | 270 |
| SHC1    | RAPGEF1 | RAPGEF1,SHC1                     | 270 |

|      |       |            |     |
|------|-------|------------|-----|
| SHC1 | RPL5  | RPL5,SHC1  | 270 |
| SHC1 | TBX21 | SHC1,TBX21 | 270 |
| SHC1 | ZAP70 | SHC1,ZAP70 | 270 |

### **Sample 472**

| <b>Candidate<br/>AML genes</b> | <b>Known AML genes<br/>(of which the module includes<br/>candidate AML genes)</b> | <b>ALL the AML genes involved in current module</b> | <b>Sample-<br/>ID</b> |
|--------------------------------|-----------------------------------------------------------------------------------|-----------------------------------------------------|-----------------------|
| ESR1                           | ACTBL2                                                                            | ACTBL2,ESR1                                         | 472                   |
| ESR1                           | ANKRD49                                                                           | ANKRD49,ESR1,XPO1                                   | 472                   |
| ESR1                           | ASXL1                                                                             | ASXL1,ESR1,KMT2C                                    | 472                   |
| ESR1                           | ATP2A2                                                                            | ATP2A2,ESR1                                         | 472                   |
| ESR1                           | BCL2L1                                                                            | BCL2L1,ESR1,GNAI1,PTEN                              | 472                   |
| ESR1                           | BCL3                                                                              | BCL3,ESR1,NFKB1                                     | 472                   |
| ESR1                           | BRCA1                                                                             | BRCA1,ESR1,MSH2                                     | 472                   |
| ESR1                           | CAD                                                                               | CAD,ESR1,XPO1                                       | 472                   |
| ESR1                           | CAV1                                                                              | CAV1,ESR1                                           | 472                   |
| ESR1                           | CCND1                                                                             | BRCA1,CCND1,ESR1,MSH6,XPO1                          | 472                   |
| ESR1                           | CDKN1A                                                                            | CDKN1A,ESR1,MSH2                                    | 472                   |
| ESR1                           | CEBPB                                                                             | CEBPB,ESR1,HDAC9,NFKB1                              | 472                   |
| ESR1                           | CHD2                                                                              | CHD2,ESR1,SMC1A                                     | 472                   |
| ESR1                           | CNTN2                                                                             | CNTN2,ESR1,NCAM1,PTEN                               | 472                   |
| ESR1                           | COX10                                                                             | COX10,ESR1                                          | 472                   |
| ESR1                           | CTNNB1                                                                            | CTNNB1,ESR1,SMC1A                                   | 472                   |
| ESR1                           | DAXX                                                                              | DAXX,ESR1,XPO1                                      | 472                   |
| ESR1                           | DCT                                                                               | DCT,ESR1                                            | 472                   |
| ESR1                           | DLX4                                                                              | DLX4,ESR1                                           | 472                   |
| ESR1                           | DNTT                                                                              | DNTT,ESR1                                           | 472                   |
| ESR1                           | ECT2L                                                                             | ECT2L,ESR1,NFKB1                                    | 472                   |
| ESR1                           | ERBB4                                                                             | ERBB4,ESR1                                          | 472                   |
| ESR1                           | EWSR1                                                                             | ESR1,EWSR1,FN1,GAPDH                                | 472                   |
| ESR1                           | FN1                                                                               | ESR1,FN1                                            | 472                   |
| ESR1                           | GAPDH                                                                             | ESR1,FN1,GAPDH,HSPD1,XPO1                           | 472                   |
| ESR1                           | GNAI1                                                                             | BCL2L1,ESR1,GNAI1                                   | 472                   |
| ESR1                           | HDAC9                                                                             | ESR1,HDAC9                                          | 472                   |
| ESR1                           | HLA-G                                                                             | ESR1,HLA-G                                          | 472                   |
| ESR1                           | HNF4A                                                                             | ESR1,HNF4A,XPO1                                     | 472                   |
| ESR1                           | HPS4                                                                              | ESR1,HPS4,RAN                                       | 472                   |
| ESR1                           | HSPA4                                                                             | ESR1,HSPA4,HSPD1                                    | 472                   |
| ESR1                           | HSPA8                                                                             | ESR1,HSPA8                                          | 472                   |
| ESR1                           | HSPD1                                                                             | ESR1,FN1,HSPD1                                      | 472                   |
| ESR1                           | ICOS                                                                              | ERBB4,ESR1,ICOS                                     | 472                   |

|      |         |                              |     |
|------|---------|------------------------------|-----|
| ESR1 | IGF1R   | ESR1,IGF1R,NFKB1,NRAS        | 472 |
| ESR1 | JAK2    | BRCA1,ESR1,HSPA8,IGF1R,JAK2  | 472 |
| ESR1 | JUP     | CTNNB1,ESR1,JUP,MSH2         | 472 |
| ESR1 | KDM6A   | ESR1,KDM6A,KMT2C,MAPK14      | 472 |
| ESR1 | KMT2C   | ESR1,KDM6A,KMT2C,MAPK14      | 472 |
| ESR1 | LCK     | ESR1,LCK,PIK3CA              | 472 |
| ESR1 | LRP1B   | ESR1,HSPA8,LRP1B             | 472 |
| ESR1 | MAPK14  | ESR1,MAPK14                  | 472 |
| ESR1 | MED12   | ESR1,MED12,XPO1              | 472 |
| ESR1 | MRC2    | ESR1,HSPD1,MRC2              | 472 |
| ESR1 | MSH2    | BRCA1,ESR1,MSH2,MSH6         | 472 |
| ESR1 | MSH6    | BRCA1,ESR1,MSH2,MSH6,SMC1A   | 472 |
| ESR1 | MUC1    | CEBPB,ERBB4,ESR1,MUC1        | 472 |
| ESR1 | MVP     | BRCA1,ESR1,MVP,PARP4         | 472 |
| ESR1 | NCAM1   | CNTN2,ESR1,NCAM1,SDC1        | 472 |
| ESR1 | NF1     | ESR1,NF1                     | 472 |
| ESR1 | NFKB1   | ESR1,MSH2,NFKB1              | 472 |
| ESR1 | NME2    | ERBB4,ESR1,NME2              | 472 |
| ESR1 | NOS3    | CAV1,ESR1,NOS3               | 472 |
| ESR1 | NPPA    | ESR1,HNF4A,NPPA              | 472 |
| ESR1 | NRAS    | ESR1,IGF1R,NFKB1,NRAS        | 472 |
| ESR1 | PAC3IN3 | ESR1,HSPA8,PAC3IN3,RPL10     | 472 |
| ESR1 | PARP1   | ESR1,FN1,HDAC9,PARP1         | 472 |
| ESR1 | PARP4   | BRCA1,CAV1,ESR1,MVP,PARP4    | 472 |
| ESR1 | PGR     | BRCA1,ESR1,GNAI1,PARP1,PGR   | 472 |
| ESR1 | PICALM  | ESR1,FN1,PICALM              | 472 |
| ESR1 | PIK3CA  | ESR1,PIK3CA                  | 472 |
| ESR1 | PPP2R3A | ESR1,PPP2R3A                 | 472 |
| ESR1 | PTEN    | CTNNB1,ERBB4,ESR1,GNAI1,PTEN | 472 |
| ESR1 | PTPRT   | ATP2A2,ERBB4,ESR1,PTPRT      | 472 |
| ESR1 | RAG2    | BRCA1,ESR1,RAG2              | 472 |
| ESR1 | RAN     | ESR1,RAN                     | 472 |
| ESR1 | RARA    | ESR1,FN1,RARA                | 472 |
| ESR1 | RPL10   | ESR1,RPL10,RPL5              | 472 |
| ESR1 | RPL19   | ESR1,RPL10,RPL19,RPL5        | 472 |
| ESR1 | RPL5    | ESR1,FN1,RPL5,XPO1           | 472 |
| ESR1 | RTKN    | ESR1,RTKN                    | 472 |
| ESR1 | RXRA    | ESR1,RARA,RXRA               | 472 |
| ESR1 | SDC1    | ESR1,SDC1                    | 472 |
| ESR1 | SET     | ESR1,FN1,GAPDH,SET,XPO1      | 472 |
| ESR1 | SKP1    | ESR1,SKP1                    | 472 |
| ESR1 | SMC1A   | BRCA1,ESR1,MSH2,MSH6,SMC1A   | 472 |
| ESR1 | SNRPE   | ESR1,FN1,SNRPE               | 472 |



|      |        |                                |     |
|------|--------|--------------------------------|-----|
| ESR1 | SPN    | CTNNB1,ESR1,MUC1,SPN           | 472 |
| ESR1 | SUZ12  | ESR1,SUZ12                     | 472 |
| ESR1 | TCF15  | ESR1,MSH2,SUZ12,TCF15          | 472 |
| ESR1 | TF     | ESR1,FN1,TF                    | 472 |
| ESR1 | TFRC   | CAV1,ESR1,TF,TFRC              | 472 |
| ESR1 | TG     | ESR1,TG                        | 472 |
| ESR1 | TLR7   | ESR1,TLR7,XPO1                 | 472 |
| ESR1 | TOP2A  | ESR1,TOP2A                     | 472 |
| ESR1 | TRRAP  | ESR1,TRRAP                     | 472 |
| ESR1 | XBPI   | ESR1,XBPI                      | 472 |
| ESR1 | XPO1   | ERBB4,ESR1,XPO1                | 472 |
| ESR1 | ZBTB16 | ESR1,HDAC9,ZBTB16              | 472 |
| FYN  | ABL1   | ABL1,FYN,JAK2                  | 472 |
| FYN  | ANPEP  | ANPEP,FYN                      | 472 |
| FYN  | BCR    | BCR,CRKL,FYN                   | 472 |
| FYN  | BTK    | BTK,FYN,JAK1                   | 472 |
| FYN  | C5     | C5,FYN                         | 472 |
| FYN  | CASP3  | CASP3,FYN,RASA1                | 472 |
| FYN  | CD14   | CD14,FYN,LCK                   | 472 |
| FYN  | CD19   | BTK,CD19,CD22,CD79A,CR2,FYN    | 472 |
| FYN  | CD2    | CD2,CD58,FYN,LCK               | 472 |
| FYN  | CD22   | CD19,CD22,CD79A,CR2,FYN        | 472 |
| FYN  | CD33   | CD33,FYN,RASA1,ZAP70           | 472 |
| FYN  | CD58   | CD2,CD58,FYN,LCK               | 472 |
| FYN  | CD79A  | CD19,CD79A,FYN                 | 472 |
| FYN  | CD86   | CD86,CTLA4,FYN,LCK             | 472 |
| FYN  | CDK5   | CDK5,FYN                       | 472 |
| FYN  | CR2    | CD19,CD22,CD79A,CR2,FYN        | 472 |
| FYN  | CRKL   | CRKL,FYN,ZAP70                 | 472 |
| FYN  | CSF1R  | CSF1R,FYN,KIT,RASA1            | 472 |
| FYN  | CSF2RB | BCR,CSF2RB,FYN,JAK1,JAK2,KIT   | 472 |
| FYN  | CTLA4  | CD86,CTLA4,FYN,JAK2,LCK,PTPN11 | 472 |
| FYN  | CTNNB1 | CTNNB1,FYN                     | 472 |
| FYN  | DNM2   | DNM2,FYN                       | 472 |
| FYN  | DOK1   | ABL1,CRKL,DOK1,FYN,PTPN11      | 472 |
| FYN  | F2     | C5,F2,FYN                      | 472 |
| FYN  | FAS    | FAS,FYN                        | 472 |
| FYN  | FASLG  | FASLG,FYN                      | 472 |
| FYN  | FCGR1A | CRKL,FCGR1A,FYN,ZAP70          | 472 |
| FYN  | FLT1   | CRKL,CTNNB1,FLT1,FYN,KDR,VEGFA | 472 |
| FYN  | FLT3   | CRKL,FLT3,FYN,RASA1            | 472 |
| FYN  | GAPDH  | FYN,GAPDH                      | 472 |
| FYN  | GUCY2D | FYN,GUCY2D                     | 472 |

|      |         |                                    |     |
|------|---------|------------------------------------|-----|
| FYN  | ICOS    | CD19,CRKL,FYN,ICOS                 | 472 |
| FYN  | IL15    | FYN,IL15,IL2RA,IL2RB,IL7R          | 472 |
| FYN  | IL2RA   | FYN,IL2RA,IL2RB                    | 472 |
| FYN  | IL2RB   | FYN,IL15,IL2RA,IL2RB               | 472 |
| FYN  | IL7     | FYN,IL7,IL7R,SOCS1                 | 472 |
| FYN  | IL7R    | FYN,IL2RB,IL7,IL7R,KIT,MS4A1,SOCS1 | 472 |
| FYN  | JAK1    | FYN,JAK1                           | 472 |
| FYN  | JAK2    | FYN,JAK2                           | 472 |
| FYN  | KDR     | FLT1,FYN,KDR,VEGFA                 | 472 |
| FYN  | KIT     | FYN,IL7R,KIT                       | 472 |
| FYN  | KITLG   | FLT3,FYN,IL7R,KIT,KITLG            | 472 |
| FYN  | LCK     | CD86,FYN,LCK                       | 472 |
| FYN  | MAP4K1  | CASP3,FYN,MAP4K1                   | 472 |
| FYN  | MAT2A   | FYN,MAT2A                          | 472 |
| FYN  | MBP     | FYN,MBP                            | 472 |
| FYN  | MS4A1   | FYN,IL7,IL7R,KIT,LCK,MS4A1         | 472 |
| FYN  | NCAM1   | FYN,NCAM1                          | 472 |
| FYN  | PKIA    | FYN,PKIA                           | 472 |
| FYN  | PTPN11  | CRKL,FYN,PTPN11                    | 472 |
| FYN  | RAPGEF1 | CRKL,FYN,RAPGEF1                   | 472 |
| FYN  | RASA1   | FYN,RASA1,ZAP70                    | 472 |
| FYN  | RHOH    | CRKL,FYN,RASA1,RHOH,ZAP70          | 472 |
| FYN  | SNCA    | FYN,SNCA                           | 472 |
| FYN  | SOCS1   | FYN,SOCS1                          | 472 |
| FYN  | SPN     | CTNNB1,FYN,SPN                     | 472 |
| FYN  | THY1    | FYN,LCK,THY1                       | 472 |
| FYN  | VEGFA   | CTNNB1,FYN,VEGFA                   | 472 |
| FYN  | ZAP70   | CRKL,FYN,LCK,ZAP70                 | 472 |
| GRB2 | ASXL1   | ASXL1,GRB2                         | 472 |
| GRB2 | BCR     | BCR,CRKL,GRB2                      | 472 |
| GRB2 | BLNK    | BLNK,BTK,CD72,CRKL,GRB2            | 472 |
| GRB2 | BTK     | BTK,GRB2,JAK1                      | 472 |
| GRB2 | CASP2   | CASP2,GRB2                         | 472 |
| GRB2 | CCR5    | CCR5,CD4,DNM2,GRB2,JAK2,LCK        | 472 |
| GRB2 | CD19    | BTK,CD19,CR2,GRB2                  | 472 |
| GRB2 | CD1A    | CD1A,GRB2                          | 472 |
| GRB2 | CD4     | CD4,CD86,GRB2,LCK,PTPRC            | 472 |
| GRB2 | CD72    | BLNK,CD4,CD72,GRB2,LCK,ZAP70       | 472 |
| GRB2 | CD86    | CD4,CD86,GRB2,LCK,PTPRC            | 472 |
| GRB2 | CDKN1B  | CDKN1B,GRB2,JAK2                   | 472 |
| GRB2 | CR2     | CD19,CR2,GRB2                      | 472 |
| GRB2 | CRKL    | CRKL,GRB2,ZAP70                    | 472 |
| GRB2 | CSF1R   | CSF1R,GRB2,KIT                     | 472 |

|      |         |                                    |     |
|------|---------|------------------------------------|-----|
| GRB2 | CSF3    | CSF3,GRB2,JAK1,JAK2                | 472 |
| GRB2 | DLX4    | DLX4,GRB2                          | 472 |
| GRB2 | DNM2    | DNM2,GRB2                          | 472 |
| GRB2 | DOK1    | CRKL,DOK1,DOK2,GRB2,INPP5D,PTPN11  | 472 |
| GRB2 | DOK2    | CRKL,DOK2,GRB2,INPP5D,JAK1         | 472 |
| GRB2 | E2F1    | E2F1,GRB2                          | 472 |
| GRB2 | EGF     | EGF,FGFR2,GRB2                     | 472 |
| GRB2 | EGR1    | EGR1,GRB2                          | 472 |
| GRB2 | EPO     | EPO,EPOR,GRB2,JAK2,KIT,KITLG,PTPRC | 472 |
| GRB2 | EPOR    | EPO,EPOR,GRB2,KIT,KITLG,PTPRC      | 472 |
| GRB2 | FCGR1A  | CRKL,FCGR1A,GRB2,ZAP70             | 472 |
| GRB2 | FGFR2   | FGFR2,GRB2                         | 472 |
| GRB2 | FLT1    | CRKL,FLT1,GRB2                     | 472 |
| GRB2 | FLT3    | CRKL,FLT3,GRB2                     | 472 |
| GRB2 | GAPDH   | GAPDH,GRB2                         | 472 |
| GRB2 | GC      | GC,GRB2,TF                         | 472 |
| GRB2 | GHR     | GHR,GRB2,JAK1,JAK2,PTPRC           | 472 |
| GRB2 | HSPA5   | GRB2,HSPA5                         | 472 |
| GRB2 | IL2RB   | GRB2,IL2RB                         | 472 |
| GRB2 | IL4     | GRB2,IL2RB,IL4,IL9R                | 472 |
| GRB2 | IL5RA   | GRB2,IL5RA,IL9R,JAK1,JAK2          | 472 |
| GRB2 | IL9R    | GRB2,IL2RB,IL4,IL9R                | 472 |
| GRB2 | INPP5D  | CRKL,DOK2,GRB2,INPP5D,JAK1         | 472 |
| GRB2 | JAK1    | GRB2,INPP5D,JAK1                   | 472 |
| GRB2 | JAK2    | GRB2,JAK2                          | 472 |
| GRB2 | KIT     | EPOR,GRB2,KIT                      | 472 |
| GRB2 | KITLG   | EPOR,FLT3,GRB2,KIT,KITLG           | 472 |
| GRB2 | LCK     | CD4,CD86,GRB2,LCK,PTPRC            | 472 |
| GRB2 | LIFR    | GRB2,JAK1,LIFR                     | 472 |
| GRB2 | MAP4K1  | GRB2,MAP4K1                        | 472 |
| GRB2 | MERTK   | GRB2,HSPA5,MERTK                   | 472 |
| GRB2 | MYH11   | GRB2,MYH11                         | 472 |
| GRB2 | PREP    | GRB2,PREP                          | 472 |
| GRB2 | PTPN11  | CRKL,GRB2,PTPN11                   | 472 |
| GRB2 | PTPRC   | CD4,GRB2,JAK2,PTPRC                | 472 |
| GRB2 | PTPRT   | GRB2,PTPRT                         | 472 |
| GRB2 | RAPGEF1 | CRKL,GRB2,RAPGEF1                  | 472 |
| GRB2 | RHOH    | CD4,CRKL,GRB2,RHOH,ZAP70           | 472 |
| GRB2 | SOCS1   | GRB2,SOCS1                         | 472 |
| GRB2 | SYNJ1   | GRB2,SYNJ1                         | 472 |
| GRB2 | TF      | GRB2,TF                            | 472 |
| GRB2 | WNK2    | GRB2,WNK2                          | 472 |
| GRB2 | ZAP70   | CD4,CRKL,GRB2,LCK,ZAP70            | 472 |

|       |         |                                |     |
|-------|---------|--------------------------------|-----|
| HDAC1 | AFF1    | AFF1,HDAC1                     | 472 |
| HDAC1 | BCL11B  | BCL11B,HDAC1,SRSF2             | 472 |
| HDAC1 | BCL2    | BCL2,HDAC1                     | 472 |
| HDAC1 | BCL2L11 | BCL2,BCL2L11,HDAC1,MAPK8       | 472 |
| HDAC1 | BCL3    | BCL3,HDAC1,TBL1XR1             | 472 |
| HDAC1 | BCOR    | BCOR,HDAC1                     | 472 |
| HDAC1 | CHFR    | CHFR,HDAC1                     | 472 |
| HDAC1 | CTCF    | CTCF,HDAC1                     | 472 |
| HDAC1 | DIABLO  | DIABLO,HDAC1,PFDN4             | 472 |
| HDAC1 | DNMT1   | DNMT1,DNMT3A,EZH2,HDAC1,SPI1   | 472 |
| HDAC1 | DNMT3A  | DNMT3A,EZH2,HDAC1,SPI1         | 472 |
| HDAC1 | DNTT    | DNTT,HDAC1                     | 472 |
| HDAC1 | EGR1    | EGR1,HDAC1                     | 472 |
| HDAC1 | EZH2    | EZH2,HDAC1                     | 472 |
| HDAC1 | FLI1    | FLI1,HDAC1,TP73                | 472 |
| HDAC1 | FOXP3   | FOXP3,HDAC1                    | 472 |
| HDAC1 | GATA2   | GATA2,HDAC1,TAL1               | 472 |
| HDAC1 | HIF1A   | HDAC1,HIF1A,IDH2,PPARG,RUNX1   | 472 |
| HDAC1 | HOXA9   | HDAC1,HOXA9,MEIS1,PBX1         | 472 |
| HDAC1 | IDH2    | HDAC1,HIF1A,IDH2,PPARG         | 472 |
| HDAC1 | KLF4    | EGR1,HDAC1,KLF4,PPARG          | 472 |
| HDAC1 | MAP2K1  | HDAC1,MAP2K1                   | 472 |
| HDAC1 | MAPK8   | HDAC1,MAPK8                    | 472 |
| HDAC1 | MDM2    | HDAC1,HOXA9,MDM2,PBX1          | 472 |
| HDAC1 | MEIS1   | HDAC1,HOXA9,MDM2,MEIS1,PBX1    | 472 |
| HDAC1 | PBX1    | HDAC1,MDM2,MEIS1,PBX1          | 472 |
| HDAC1 | PFDN4   | HDAC1,PFDN4                    | 472 |
| HDAC1 | PHF6    | HDAC1,PHF6                     | 472 |
| HDAC1 | PIK3CA  | HDAC1,PIK3CA                   | 472 |
| HDAC1 | PPARG   | HDAC1,HIF1A,IDH2,PPARG         | 472 |
| HDAC1 | RAF1    | HDAC1,RAF1                     | 472 |
| HDAC1 | RARA    | HDAC1,RARA,RUNX1               | 472 |
| HDAC1 | RASGRP3 | HDAC1,PIK3CA,RASGRP3           | 472 |
| HDAC1 | RUNX1   | HDAC1,HIF1A,RARA,RUNX1,RUNX1T1 | 472 |
| HDAC1 | RUNX1T1 | HDAC1,RUNX1,RUNX1T1,ZBTB16     | 472 |
| HDAC1 | SALL4   | EZH2,HDAC1,SALL4               | 472 |
| HDAC1 | SAMSN1  | HDAC1,SAMSN1                   | 472 |
| HDAC1 | SFPQ    | HDAC1,SFPQ,TP73                | 472 |
| HDAC1 | SPI1    | DNMT1,DNMT3A,EZH2,HDAC1,SPI1   | 472 |
| HDAC1 | SRSF2   | HDAC1,SRSF2                    | 472 |
| HDAC1 | STAT5A  | HDAC1,STAT5A                   | 472 |
| HDAC1 | TAL1    | GATA2,HDAC1,TAL1               | 472 |
| HDAC1 | TBL1XR1 | HDAC1,TBL1XR1                  | 472 |

|       |         |                             |     |
|-------|---------|-----------------------------|-----|
| HDAC1 | TOP2A   | HDAC1, TOP2A, TOP2B         | 472 |
| HDAC1 | TOP2B   | HDAC1, TOP2A, TOP2B         | 472 |
| HDAC1 | TP73    | HDAC1, SFPQ, TP73           | 472 |
| HDAC1 | ZBTB16  | EZH2, HDAC1, ZBTB16         | 472 |
| HDAC1 | ZMYM2   | HDAC1, SFPQ, ZMYM2          | 472 |
| HDAC1 | ZMYM3   | HDAC1, ZMYM3                | 472 |
| HDAC1 | ZNF79   | DNMT1, HDAC1, RUNX1, ZNF79  | 472 |
| LYN   | ANGPT1  | ANGPT1, ANGPT2, LYN, PTPRC  | 472 |
| LYN   | ANGPT2  | ANGPT1, ANGPT2, LYN         | 472 |
| LYN   | BLNK    | BLNK, BTK, CD72, LYN        | 472 |
| LYN   | BTK     | BTK, LYN                    | 472 |
| LYN   | CASP9   | CASP9, LYN                  | 472 |
| LYN   | CD36    | CD36, CD9, LYN              | 472 |
| LYN   | CD72    | BLNK, CD72, LYN             | 472 |
| LYN   | CD9     | CD36, CD9, LYN              | 472 |
| LYN   | CDK4    | CDK4, LYN                   | 472 |
| LYN   | CSF2RB  | CSF2RB, IL5RA, LYN          | 472 |
| LYN   | CSF3    | CSF3, LYN                   | 472 |
| LYN   | CTLA4   | CTLA4, LYN                  | 472 |
| LYN   | DHRS9   | DHRS9, LYN                  | 472 |
| LYN   | DOK1    | DOK1, DOK2, INPP5D, LYN     | 472 |
| LYN   | DOK2    | DOK2, INPP5D, LYN           | 472 |
| LYN   | ETV6    | ETV6, LYN                   | 472 |
| LYN   | FGR     | FGR, LYN                    | 472 |
| LYN   | FLT3    | FLT3, LYN                   | 472 |
| LYN   | GP1BA   | GP1BA, LYN                  | 472 |
| LYN   | IL1B    | IL1B, LYN, PDGFRB           | 472 |
| LYN   | IL5RA   | CSF2RB, IL5RA, LYN          | 472 |
| LYN   | IL6ST   | IL6ST, LYN                  | 472 |
| LYN   | IL7R    | IL7R, LYN, MS4A1            | 472 |
| LYN   | INPP5D  | DOK2, INPP5D, LYN           | 472 |
| LYN   | ITGB2   | ITGB2, LYN                  | 472 |
| LYN   | KITLG   | CD9, FLT3, IL7R, KITLG, LYN | 472 |
| LYN   | MAP4K1  | LYN, MAP4K1                 | 472 |
| LYN   | MME     | LYN, MME                    | 472 |
| LYN   | MS4A1   | IL7R, LYN, MS4A1            | 472 |
| LYN   | PACSIN3 | LYN, PACSIN3                | 472 |
| LYN   | PDGFRB  | IL1B, LYN, PDGFRB           | 472 |
| LYN   | POU2F2  | LYN, POU2F2                 | 472 |
| LYN   | PRKCQ   | BTK, LYN, PRKCQ             | 472 |
| LYN   | PTPRC   | LYN, PDGFRB, PTPRC          | 472 |
| SHC1  | AMD1    | AMD1, SHC1                  | 472 |
| SHC1  | BCR     | BCR, SHC1                   | 472 |

|       |          |                                |     |
|-------|----------|--------------------------------|-----|
| SHC1  | CSF1R    | CSF1R,SHC1,TEK                 | 472 |
| SHC1  | CSF2RB   | BCR,CSF2RB,SHC1                | 472 |
| SHC1  | DOK1     | DOK1,INPP5D,PTPN11,SHC1        | 472 |
| SHC1  | EGF      | EGF,FGFR2,SHC1                 | 472 |
| SHC1  | EGR1     | EGR1,SHC1                      | 472 |
| SHC1  | FCGR1A   | FCGR1A,SHC1,ZAP70              | 472 |
| SHC1  | FCGR3A   | FCGR1A,FCGR3A,SHC1,ZAP70       | 472 |
| SHC1  | FGFR2    | FGFR2,SHC1                     | 472 |
| SHC1  | FLT1     | FLT1,KDR,SHC1                  | 472 |
| SHC1  | FLT3     | FLT3,SHC1                      | 472 |
| SHC1  | GHR      | GHR,SHC1                       | 472 |
| SHC1  | IL2RB    | IL2RB,IL2RG,SHC1               | 472 |
| SHC1  | IL2RG    | IL2RG,IL4,IL4R,IL9R,SHC1       | 472 |
| SHC1  | IL4      | IL2RB,IL2RG,IL4,IL4R,IL9R,SHC1 | 472 |
| SHC1  | IL4R     | IL2RG,IL4,IL4R,SHC1            | 472 |
| SHC1  | IL6ST    | IL6ST,SHC1                     | 472 |
| SHC1  | IL9R     | IL2RB,IL2RG,IL4,IL9R,SHC1      | 472 |
| SHC1  | INPP5D   | INPP5D,SHC1                    | 472 |
| SHC1  | IRAK1    | IRAK1,SHC1                     | 472 |
| SHC1  | KDR      | FLT1,KDR,SHC1                  | 472 |
| SHC1  | MAPKAPK2 | MAPKAPK2,SHC1                  | 472 |
| SHC1  | MAT1A    | MAT1A,SHC1                     | 472 |
| SHC1  | MPL      | MPL,SHC1                       | 472 |
| SHC1  | MYH11    | MYH11,SHC1                     | 472 |
| SHC1  | PTPN11   | PTPN11,SHC1                    | 472 |
| SHC1  | RAPGEF1  | RAPGEF1,SHC1                   | 472 |
| SHC1  | RET      | RET,SHC1                       | 472 |
| SHC1  | TEK      | CSF1R,SHC1,TEK                 | 472 |
| SHC1  | ZAP70    | SHC1,ZAP70                     | 472 |
| STAT1 | BCL3     | BCL3,STAT1                     | 472 |
| STAT1 | CCR1     | CCR1,STAT1                     | 472 |
| STAT1 | CCR5     | CCR5,CXCR4,EGFR,JAK2,LCK,STAT1 | 472 |
| STAT1 | CD40     | CD40,STAT1                     | 472 |
| STAT1 | CSF2RB   | CSF2RB,JAK2,KIT,STAT1,SYK      | 472 |
| STAT1 | CXCR4    | CXCR4,STAT1                    | 472 |
| STAT1 | CYBB     | CYBB,STAT1,TNFRSF1A            | 472 |
| STAT1 | E2F1     | E2F1,STAT1                     | 472 |
| STAT1 | EGFR     | EGFR,STAT1                     | 472 |
| STAT1 | FLT1     | FLT1,KDR,STAT1                 | 472 |
| STAT1 | FOXP3    | FOXP3,STAT1                    | 472 |
| STAT1 | GATA3    | GATA3,MAPK14,STAT1,TBX21       | 472 |
| STAT1 | GFAP     | GFAP,STAT1                     | 472 |
| STAT1 | HSPA4L   | HSPA4L,STAT1                   | 472 |

|       |          |                          |     |
|-------|----------|--------------------------|-----|
| STAT1 | IFNAR2   | IFNAR2,ISG15,STAT1       | 472 |
| STAT1 | IFNG     | IFNG,JAK2,STAT1          | 472 |
| STAT1 | IL2RG    | IL2RG,JAK2,KIT,STAT1     | 472 |
| STAT1 | IL6ST    | EGFR,IL6ST,JAK2,STAT1    | 472 |
| STAT1 | IRF8     | IRF8,ISG15,PTPN11,STAT1  | 472 |
| STAT1 | ISG15    | ISG15,STAT1              | 472 |
| STAT1 | JAK2     | EGFR,JAK2,NFKBIA,STAT1   | 472 |
| STAT1 | KDR      | FLT1,KDR,STAT1           | 472 |
| STAT1 | KIT      | KIT,STAT1                | 472 |
| STAT1 | LCK      | LCK,PIK3CA,STAT1         | 472 |
| STAT1 | LIF      | IL6ST,LIF,STAT1          | 472 |
| STAT1 | MAPK14   | MAPK14,PML,STAT1         | 472 |
| STAT1 | NFKBIA   | JAK2,NFKBIA,STAT1        | 472 |
| STAT1 | NOS2     | NOS2,STAT1               | 472 |
| STAT1 | PDGFRB   | PDGFRB,STAT1             | 472 |
| STAT1 | PIK3CA   | PIK3CA,STAT1             | 472 |
| STAT1 | PML      | PML,STAT1                | 472 |
| STAT1 | POU2F2   | POU2F2,STAT1             | 472 |
| STAT1 | PSMC3    | PSMC3,STAT1,XPO1         | 472 |
| STAT1 | PTPN11   | PTPN11,STAT1             | 472 |
| STAT1 | STAT5A   | STAT1,STAT5A             | 472 |
| STAT1 | SYK      | STAT1,SYK                | 472 |
| STAT1 | TBX21    | GATA3,MAPK14,STAT1,TBX21 | 472 |
| STAT1 | TLR7     | STAT1,TLR7,XPO1          | 472 |
| STAT1 | TNFRSF1A | EGFR,STAT1,TNFRSF1A      | 472 |
| STAT1 | XPO1     | PSMC3,STAT1,XPO1         | 472 |
| XRCC5 | APEX1    | APEX1,XRCC5              | 472 |
| XRCC5 | BAX      | BAX,XRCC5                | 472 |
| XRCC5 | BIRC3    | BIRC3,MSH2,MSH6,XRCC5    | 472 |
| XRCC5 | BRCA1    | BRCA1,MSH2,XRCC5         | 472 |
| XRCC5 | CDK2     | CDK2,MSH2,XRCC5          | 472 |
| XRCC5 | CFTR     | CFTR,XRCC5               | 472 |
| XRCC5 | CHEK2    | BRCA1,CHEK2,MSH2,XRCC5   | 472 |
| XRCC5 | DLD      | DLD,XRCC5                | 472 |
| XRCC5 | EED      | EED,XRCC5                | 472 |
| XRCC5 | EP300    | EP300,JUN,XRCC5          | 472 |
| XRCC5 | EWSR1    | EWSR1,ITGA4,JUN,XRCC5    | 472 |
| XRCC5 | FLI1     | BRCA1,EWSR1,FLI1,XRCC5   | 472 |
| XRCC5 | HSPA4    | CFTR,HSPA4,JUN,XRCC5     | 472 |
| XRCC5 | HSPB1    | EP300,HSPB1,XRCC5        | 472 |
| XRCC5 | ICAM1    | CFTR,ICAM1,XRCC5         | 472 |
| XRCC5 | ISG15    | ISG15,XRCC5              | 472 |
| XRCC5 | ITGA4    | ITGA4,XRCC5              | 472 |

|       |       |                                     |     |
|-------|-------|-------------------------------------|-----|
| XRCC5 | JUN   | EP300,JUN,XRCC5                     | 472 |
| XRCC5 | JUP   | JUP,MSH2,XRCC5                      | 472 |
| XRCC5 | MAPK8 | JUN,MAPK8,XRCC5                     | 472 |
| XRCC5 | MME   | MME,PCNA,XRCC5                      | 472 |
| XRCC5 | MSH2  | BRCA1,CHEK2,JUN,MSH2,MSH6,XRCC5     | 472 |
| XRCC5 | MSH6  | BRCA1,MSH2,MSH6,MYC,PCNA,XRCC5      | 472 |
| XRCC5 | MYC   | JUN,MSH2,MYC,XRCC5                  | 472 |
| XRCC5 | NFKB2 | NFKB2,XRCC5                         | 472 |
| XRCC5 | NOS2  | HSPB1,JUN,NOS2,XRCC5                | 472 |
| XRCC5 | NR4A1 | CHEK2,MAPK8,NR4A1,XRCC5             | 472 |
| XRCC5 | PARP1 | JUN,MYC,PARP1,XRCC5                 | 472 |
| XRCC5 | PCNA  | BRCA1,EP300,PCNA,XRCC5              | 472 |
| XRCC5 | PTEN  | PTEN,XRCC5                          | 472 |
| XRCC5 | PTPRT | PTPRT,XRCC5                         | 472 |
| XRCC5 | RFC1  | BRCA1,MSH2,MSH6,MYC,PCNA,RFC1,XRCC5 | 472 |
| XRCC5 | SUZ12 | SUZ12,XRCC5                         | 472 |
| XRCC5 | TERT  | MYC,TERT,XRCC5                      | 472 |
| XRCC5 | TOP2A | EP300,MYC,TOP2A,TOP2B,XRCC5         | 472 |
| XRCC5 | TOP2B | EP300,JUN,MSH2,TOP2A,TOP2B,XRCC5    | 472 |

### **Sample 546**

| <b>Candidate AML genes</b> | <b>Known AML genes</b><br>(of which the module includes candidate AML genes) | <b>ALL the AML genes involved in current module</b> | <b>Sample-ID</b> |
|----------------------------|------------------------------------------------------------------------------|-----------------------------------------------------|------------------|
| HDAC1                      | AFF1                                                                         | AFF1,HDAC1                                          | 546              |
| HDAC1                      | ANPEP                                                                        | ANPEP,APEX1,HDAC1,JUN,TP53                          | 546              |
| HDAC1                      | APEX1                                                                        | APEX1,HDAC1,JUN,PCNA,TP53                           | 546              |
| HDAC1                      | ATM                                                                          | ATM,HDAC1,TP53                                      | 546              |
| HDAC1                      | BCL11B                                                                       | BCL11B,HDAC1                                        | 546              |
| HDAC1                      | BCL3                                                                         | BCL3,HDAC1,JUN,NFKB2,TBL1XR1                        | 546              |
| HDAC1                      | CCND1                                                                        | CCND1,HDAC1,JUN,PCNA,RUNX1,TP53                     | 546              |
| HDAC1                      | CDCA7L                                                                       | CDCA7L,HDAC1,HOXA9,PBX1                             | 546              |
| HDAC1                      | CDKN1A                                                                       | CDKN1A,HDAC1,JUN                                    | 546              |
| HDAC1                      | CEACAM5                                                                      | CEACAM5,HDAC1                                       | 546              |
| HDAC1                      | CEBPB                                                                        | CEBPB,HDAC1,HDAC9,JUN,SYK,TP53                      | 546              |
| HDAC1                      | CHFR                                                                         | CHFR,HDAC1,PCNA,PML                                 | 546              |
| HDAC1                      | CR2                                                                          | CR2,HDAC1                                           | 546              |
| HDAC1                      | DAXX                                                                         | ATM,DAXX,HDAC1,JUN,PML,TP53                         | 546              |
| HDAC1                      | DNMT1                                                                        | DNMT1,HDAC1,PCNA                                    | 546              |
| HDAC1                      | DNMT3A                                                                       | DAXX,DNMT1,DNMT3A,HDAC1,SPI1                        | 546              |
| HDAC1                      | E2F1                                                                         | ATM,E2F1,HDAC1,TP53                                 | 546              |



|       |         |                                                |     |
|-------|---------|------------------------------------------------|-----|
| HDAC1 | EGR1    | CEBPB,EGR1,HDAC1,JUN,TP53                      | 546 |
| HDAC1 | ELL     | ELL,HDAC1,TP53                                 | 546 |
| HDAC1 | FOXP3   | FOXP3,HDAC1                                    | 546 |
| HDAC1 | GATA2   | GATA2,HDAC1,JUN,TAL1,ZBTB16                    | 546 |
| HDAC1 | GATA3   | GATA2,GATA3,HDAC1,RUNX1,TAL1                   | 546 |
| HDAC1 | HBG2    | HBG2,HDAC1                                     | 546 |
| HDAC1 | HDAC9   | HDAC1,HDAC9,JUN,MAPK14                         | 546 |
| HDAC1 | HOXA9   | HDAC1,HOXA9,JUN,MEIS1,PBX1                     | 546 |
| HDAC1 | HSPA8   | HDAC1,HSPA8                                    | 546 |
| HDAC1 | HSPD1   | HDAC1,HSPD1                                    | 546 |
| HDAC1 | IDH2    | HDAC1,IDH2,JUN                                 | 546 |
| HDAC1 | JUN     | CEBPB,HDAC1,HDAC9,JUN,SYK,TP53                 | 546 |
| HDAC1 | KLF4    | EGR1,HDAC1,KLF4,PPARG,TP53                     | 546 |
| HDAC1 | MAPK14  | ATM,HDAC1,JUN,MAPK14,TP53                      | 546 |
| HDAC1 | MECOM   | HDAC1,JUN,MECOM,TP53                           | 546 |
| HDAC1 | MEIS1   | CDCA7L,HDAC1,HOXA9,MEIS1,PBX1                  | 546 |
| HDAC1 | MYB     | CEBPB,GATA3,HDAC1,MYB,TAL1                     | 546 |
| HDAC1 | NFKB2   | HDAC1,HSPA8,NFKB2,NFKBIA                       | 546 |
| HDAC1 | NFKBIA  | HDAC1,HSPA8,JUN,NFKBIA                         | 546 |
| HDAC1 | NR3C1   | HDAC1,JUN,NR3C1,PBX1,TP53                      | 546 |
| HDAC1 | PBX1    | CDCA7L,HDAC1,HOXA9,PBX1                        | 546 |
| HDAC1 | PCNA    | HDAC1,JUN,PCNA                                 | 546 |
| HDAC1 | PFDN4   | HDAC1,PFDN4                                    | 546 |
| HDAC1 | PHF6    | HDAC1,JUN,PHF6                                 | 546 |
| HDAC1 | PKIA    | CCND1,HDAC1,HSPA8,PKIA                         | 546 |
| HDAC1 | PML     | HDAC1,PML,RUNX1                                | 546 |
| HDAC1 | PPARG   | E2F1,HDAC1,JUN,PPARG,TP53                      | 546 |
| HDAC1 | RAF1    | HDAC1,RAF1                                     | 546 |
| HDAC1 | RARA    | E2F1,HDAC1,HSPA8,JUN,PML,RARA,RUNX1,<br>ZBTB16 | 546 |
| HDAC1 | RUNX1   | GATA3,HDAC1,JUN,RUNX1,RUNX1T1                  | 546 |
| HDAC1 | RUNX1T1 | HDAC1,RUNX1,RUNX1T1,SPI1,TP53                  | 546 |
| HDAC1 | SALL4   | CDKN1A,HDAC1,SALL4                             | 546 |
| HDAC1 | SAMSN1  | HDAC1,SAMSN1                                   | 546 |
| HDAC1 | SETD2   | DNMT1,HDAC1,SETD2,TP53                         | 546 |
| HDAC1 | SFPQ    | HDAC1,JUN,SFPQ,ZMYM2                           | 546 |
| HDAC1 | SPI1    | CEBPB,GATA3,HDAC1,JUN,PML,SPI1                 | 546 |
| HDAC1 | STAT5A  | HDAC1,STAT5A                                   | 546 |
| HDAC1 | SYK     | HDAC1,HDAC9,JUN,SYK,TP53                       | 546 |
| HDAC1 | TAL1    | GATA2,GATA3,HDAC1,TAL1                         | 546 |
| HDAC1 | TBL1XR1 | HDAC1,TBL1XR1                                  | 546 |
| HDAC1 | TOP2A   | HDAC1,TOP2A,TOP2B,TP53                         | 546 |
| HDAC1 | TOP2B   | ATM,HDAC1,JUN,TOP2A,TOP2B                      | 546 |

|       |        |                                   |     |
|-------|--------|-----------------------------------|-----|
| HDAC1 | TP53   | CEBPB,HDAC1,HDAC9,JUN,SYK,TP53    | 546 |
| HDAC1 | ZBTB16 | HDAC1,HDAC9,JUN,SYK,TP53,ZBTB16   | 546 |
| HDAC1 | ZMYM2  | HDAC1,SFPQ,ZMYM2                  | 546 |
| HDAC1 | ZNF79  | HDAC1,ZNF79                       | 546 |
| GRB2  | ABL1   | ABL1,CRKL,GRB2,JAK1               | 546 |
| GRB2  | ASXL1  | ASXL1,GRB2                        | 546 |
| GRB2  | BCR    | ABL1,BCR,CRKL,GRB2,PIK3R1,PTPN11  | 546 |
| GRB2  | BLNK   | BLNK,CD72,GRB2                    | 546 |
| GRB2  | CCR5   | CCR5,DNM2,GRB2,LCK                | 546 |
| GRB2  | CD22   | CD22,GRB2                         | 546 |
| GRB2  | CD72   | BLNK,CD72,GRB2,ZAP70              | 546 |
| GRB2  | CD86   | CD86,GRB2,LCK,PTPN11              | 546 |
| GRB2  | CDKN1B | CDKN1B,GRB2                       | 546 |
| GRB2  | CGA    | CGA,GRB2,HSPB1                    | 546 |
| GRB2  | CRKL   | CRKL,GRB2,PIK3R1                  | 546 |
| GRB2  | CSF1R  | CSF1R,GRB2                        | 546 |
| GRB2  | CSF3   | CSF3,GRB2,JAK1                    | 546 |
| GRB2  | CXCR4  | CXCR4,GRB2                        | 546 |
| GRB2  | DLX4   | ABL1,DLX4,GRB2                    | 546 |
| GRB2  | DNM2   | DNM2,GRB2,MKI67                   | 546 |
| GRB2  | DOK1   | ABL1,CRKL,DOK1,GRB2,PIK3R1,PTPN11 | 546 |
| GRB2  | EGF    | EGF,GRB2                          | 546 |
| GRB2  | EGR1   | EGR1,GRB2                         | 546 |
| GRB2  | EPOR   | CD22,EPOR,GRB2,KIT,KITLG          | 546 |
| GRB2  | ETV6   | ETV6,GRB2                         | 546 |
| GRB2  | FCGR1A | CRKL,FCGR1A,GRB2,PIK3R1,ZAP70     | 546 |
| GRB2  | FGFR1  | CRKL,FGFR1,GRB2,PIK3R1            | 546 |
| GRB2  | FGFR2  | FGFR1,FGFR2,GRB2,PIK3R1           | 546 |
| GRB2  | FLT1   | FLT1,GRB2                         | 546 |
| GRB2  | FLT3   | ABL1,FLT3,GRB2,KIT                | 546 |
| GRB2  | GC     | GC,GRB2,TF                        | 546 |
| GRB2  | GHR    | GHR,GRB2,JAK1,PDGFRB              | 546 |
| GRB2  | HSPB1  | GRB2,HSPB1,LCK                    | 546 |
| GRB2  | IL2RB  | GRB2,IL2RB,IL7R,IL9R              | 546 |
| GRB2  | IL5RA  | GRB2,IL5RA,ILK,JAK1               | 546 |
| GRB2  | IL7R   | GRB2,IL2RB,IL7R,IL9R              | 546 |
| GRB2  | IL9R   | GRB2,IL2RB,IL7R,IL9R              | 546 |
| GRB2  | ILK    | GRB2,ILK,LCK,ZAP70                | 546 |
| GRB2  | INPP5D | CRKL,GRB2,INPP5D,JAK1             | 546 |
| GRB2  | JAK1   | ABL1,GRB2,JAK1,PIK3R1,PTPN11      | 546 |
| GRB2  | KIT    | BLNK,GRB2,KIT,PDGFRB,PIK3R1       | 546 |
| GRB2  | KITLG  | CSF1R,EPOR,FLT3,GRB2,KIT,KITLG    | 546 |
| GRB2  | LCK    | GRB2,ILK,LCK,ZAP70                | 546 |

|      |         |                                      |     |
|------|---------|--------------------------------------|-----|
| GRB2 | LIF     | GRB2,JAK1,LIF,LIFR,PIK3R1            | 546 |
| GRB2 | LIFR    | GRB2,LIF,LIFR                        | 546 |
| GRB2 | MAP4K1  | GRB2,MAP4K1,PIK3R1                   | 546 |
| GRB2 | MERTK   | GRB2,MERTK                           | 546 |
| GRB2 | MKI67   | DNM2,GRB2,MKI67                      | 546 |
| GRB2 | MPL     | EPOR,GRB2,MPL,RET                    | 546 |
| GRB2 | MYH11   | GRB2,MYH11                           | 546 |
| GRB2 | MYO1G   | GRB2,MYO1G                           | 546 |
| GRB2 | NOS2    | GRB2,NOS2                            | 546 |
| GRB2 | PDGFRB  | BLNK,GRB2,KIT,PDGFRB,PIK3R1          | 546 |
| GRB2 | PIK3R1  | GRB2,KIT,PDGFRB,PIK3R1               | 546 |
| GRB2 | PTPN11  | CRKL,GRB2,JAK1,LCK,PIK3R1,PTPN11     | 546 |
| GRB2 | RAPGEF1 | ABL1,CRKL,GRB2,PIK3R1,PTPN11,RAPGEF1 | 546 |
| GRB2 | RET     | CRKL,GRB2,PIK3R1,RET                 | 546 |
| GRB2 | RHOH    | CRKL,GRB2,LCK,PIK3R1,RHOH,ZAP70      | 546 |
| GRB2 | SALL4   | GRB2,SALL4                           | 546 |
| GRB2 | SYNJ1   | GRB2,SYNJ1                           | 546 |
| GRB2 | TF      | GRB2,TF                              | 546 |
| GRB2 | TYMS    | GRB2,HSPB1,TYMS                      | 546 |
| GRB2 | VANGL1  | GRB2,VANGL1                          | 546 |
| GRB2 | WNK2    | GRB2,WNK2                            | 546 |
| GRB2 | ZAP70   | FCGR1A,GRB2,ILK,LCK,ZAP70            | 546 |
| FYN  | BAD     | BAD,FYN                              | 546 |
| FYN  | BCL2L1  | BCL2L1,FYN,PTPRC                     | 546 |
| FYN  | BTK     | BTK,FYN,JAK1                         | 546 |
| FYN  | CASP3   | CASP3,FYN                            | 546 |
| FYN  | CASP8   | BCL2L1,CASP8,FYN                     | 546 |
| FYN  | CASP9   | BCL2L1,CASP9,FYN,RASA1               | 546 |
| FYN  | CD14    | CD14,FYN                             | 546 |
| FYN  | CD19    | CD19,FYN                             | 546 |
| FYN  | CD22    | BTK,CD19,CD22,FYN,PTPRC              | 546 |
| FYN  | CD5     | CD5,CD58,FYN,PTPRC                   | 546 |
| FYN  | CD58    | CD5,CD58,DOK1,FYN,PTPRC              | 546 |
| FYN  | CD83    | CD83,FYN                             | 546 |
| FYN  | CD86    | CD86,CTLA4,FYN,PTPN11,PTPRC          | 546 |
| FYN  | CLTC    | CLTC,FYN,TFRC                        | 546 |
| FYN  | CSF2RB  | CSF2RB,FYN,JAK1                      | 546 |
| FYN  | CTLA4   | CD86,CTLA4,FYN,JAK1                  | 546 |
| FYN  | CTNNB1  | CTNNB1,FYN                           | 546 |
| FYN  | DNM2    | DNM2,FYN,MKI67                       | 546 |
| FYN  | DOK1    | DOK1,DOK2,FYN,PTPN11,RASA1           | 546 |
| FYN  | DOK2    | DOK2,FYN,RASA1                       | 546 |
| FYN  | EPM2A   | DNM2,EPM2A,FYN,JAK1                  | 546 |

|      |           |                                        |     |
|------|-----------|----------------------------------------|-----|
| FYN  | FAS       | FAS,FYN                                | 546 |
| FYN  | FCGR1A    | FCGR1A,FYN                             | 546 |
| FYN  | FGFR2     | FGFR2,FYN                              | 546 |
| FYN  | FLT1      | FLT1,FYN                               | 546 |
| FYN  | GUCY2D    | FYN,GUCY2D                             | 546 |
| FYN  | ICAM1     | CTNNB1,FYN,ICAM1,RPL5                  | 546 |
| FYN  | IL18R1    | CASP3,FYN,IL18R1                       | 546 |
| FYN  | IL7       | FYN,IL7,IL7R,JAK1,SOCS1                | 546 |
| FYN  | IL7R      | FYN,ICAM1,IL7,IL7R                     | 546 |
| FYN  | JAK1      | FYN,JAK1,PTPN11                        | 546 |
| FYN  | LIFR      | FYN,LIFR                               | 546 |
| FYN  | MAP4K1    | CASP3,FYN,MAP4K1                       | 546 |
| FYN  | MAPK8     | FYN,MAPK8,PTPRC                        | 546 |
| FYN  | MAT2A     | FYN,MAT2A                              | 546 |
| FYN  | MERTK     | FYN,MERTK                              | 546 |
| FYN  | MKI67     | DNM2,FYN,MKI67                         | 546 |
| FYN  | MPL       | FYN,MPL,PTPRC                          | 546 |
| FYN  | MS4A1     | FYN,IL7R,MS4A1                         | 546 |
| FYN  | PRDX2     | FYN,PRDX2                              | 546 |
| FYN  | PTPN11    | FYN,JAK1,PTPN11                        | 546 |
| FYN  | PTPRC     | FYN,PTPRC,RASA1                        | 546 |
| FYN  | RAPGEF1   | FYN,PTPN11,RAPGEF1                     | 546 |
| FYN  | RASA1     | CASP3,FYN,RASA1,RPL5                   | 546 |
| FYN  | RPL5      | CASP3,FYN,RASA1,RPL5                   | 546 |
| FYN  | SOCS1     | FYN,SOCS1                              | 546 |
| FYN  | TFRC      | FYN,TFRC                               | 546 |
| FYN  | TG        | FYN,TG                                 | 546 |
| FYN  | TNFRSF10B | FYN,TNFRSF10B                          | 546 |
| SHC1 | ABL1      | ABL1,CRKL,SHC1                         | 546 |
| SHC1 | AMD1      | AMD1,HSPB1,SHC1                        | 546 |
| SHC1 | BCR       | ABL1,BCR,CRKL,PIK3R1,PTPN11,SHC1       | 546 |
| SHC1 | CRKL      | CRKL,PIK3R1,SHC1                       | 546 |
| SHC1 | CSF2RB    | BCR,CSF2RB,KIT,PIK3R1,SHC1             | 546 |
| SHC1 | DOK1      | ABL1,CRKL,DOK1,DOK2,PIK3R1,PTPN11,SHC1 | 546 |
| SHC1 | DOK2      | ABL1,CRKL,DOK2,SHC1                    | 546 |
| SHC1 | EGR1      | EGR1,SHC1                              | 546 |
| SHC1 | FCGR1A    | CRKL,FCGR1A,PIK3R1,SHC1                | 546 |
| SHC1 | FCGR3A    | FCGR1A,FCGR3A,SHC1                     | 546 |
| SHC1 | FGFR1     | CRKL,FGFR1,PIK3R1,SHC1                 | 546 |
| SHC1 | FGFR2     | FGFR1,FGFR2,PIK3R1,SHC1                | 546 |
| SHC1 | FLT1      | FLT1,SHC1                              | 546 |
| SHC1 | FLT3      | ABL1,FLT3,KIT,SHC1                     | 546 |

|      |          |                                       |     |
|------|----------|---------------------------------------|-----|
| SHC1 | GHR      | GHR,PDGFRB,SHC1                       | 546 |
| SHC1 | HSPB1    | HSPB1,SHC1                            | 546 |
| SHC1 | IGF1R    | IGF1R,SHC1                            | 546 |
| SHC1 | IL2RB    | IL2RB,IL4R,IL7R,IL9R,SHC1             | 546 |
| SHC1 | IL4R     | IL4R,SHC1                             | 546 |
| SHC1 | IL7R     | IL2RB,IL7R,IL9R,SHC1                  | 546 |
| SHC1 | IL9R     | IL2RB,IL4R,IL7R,IL9R,SHC1             | 546 |
| SHC1 | INPP5D   | CRKL,DOK2,INPP5D,SHC1                 | 546 |
| SHC1 | KIT      | KIT,PDGFRB,PIK3R1,SHC1                | 546 |
| SHC1 | KITLG    | FLT3,KIT,KITLG,SHC1                   | 546 |
| SHC1 | MAPK14   | MAPK14,SHC1                           | 546 |
| SHC1 | MAPKAPK2 | MAPK14,MAPKAPK2,SHC1                  | 546 |
| SHC1 | MAT1A    | MAT1A,SHC1                            | 546 |
| SHC1 | MPL      | FCGR3A,IGF1R,MPL,RET,SHC1             | 546 |
| SHC1 | MYH11    | MYH11,SHC1                            | 546 |
| SHC1 | NF1      | NF1,SHC1                              | 546 |
| SHC1 | PDGFRB   | KIT,PDGFRB,PIK3R1,SHC1                | 546 |
| SHC1 | PIK3R1   | KIT,PDGFRB,PIK3R1,SHC1                | 546 |
| SHC1 | PRDX2    | PRDX2,SHC1                            | 546 |
| SHC1 | PTPN11   | CRKL,MAPK14,PIK3R1,PTPN11,SHC1,STAT5A | 546 |
| SHC1 | RAPGEF1  | ABL1,CRKL,PIK3R1,PTPN11,RAPGEF1,SHC1  | 546 |
| SHC1 | RB1      | RB1,SHC1                              | 546 |
| SHC1 | RET      | CRKL,IGF1R,PIK3R1,RET,SHC1            | 546 |
| SHC1 | STAT5A   | CRKL,PTPN11,SHC1,STAT5A               | 546 |
| ESR1 | BCL3     | BCL3,ESR1                             | 546 |
| ESR1 | BIRC5    | BIRC5,ESR1                            | 546 |
| ESR1 | CAV1     | CAV1,CBL,CTNNB1,ESR1,KRAS             | 546 |
| ESR1 | CBL      | CAV1,CBL,CTNNB1,ESR1,KRAS             | 546 |
| ESR1 | CHD2     | CHD2,ESR1,EZH2                        | 546 |
| ESR1 | CNTN2    | CNTN2,ESR1,NCAM1                      | 546 |
| ESR1 | CTLA4    | CTLA4,ESR1                            | 546 |
| ESR1 | CTNNB1   | CTNNB1,ERBB4,ESR1                     | 546 |
| ESR1 | ELF4     | ELF4,ESR1                             | 546 |
| ESR1 | ERBB4    | ERBB4,ESR1                            | 546 |
| ESR1 | EZH2     | ESR1,EZH2,SUZ12                       | 546 |
| ESR1 | GP1BA    | ESR1,GP1BA,PIK3R1                     | 546 |
| ESR1 | HBA2     | ESR1,HBA2,HBB                         | 546 |
| ESR1 | HBB      | ESR1,HBA2,HBB                         | 546 |
| ESR1 | IL5RA    | ESR1,IL5RA,ILK                        | 546 |
| ESR1 | ILK      | ERBB4,ESR1,ILK                        | 546 |
| ESR1 | JUP      | CAV1,CTNNB1,ESR1,JUP,KRAS             | 546 |
| ESR1 | KIT      | ESR1,KIT,PDGFRB,PIK3R1                | 546 |
| ESR1 | KMT2C    | ESR1,EZH2,KMT2C                       | 546 |

|      |         |                           |     |
|------|---------|---------------------------|-----|
| ESR1 | KRAS    | CAV1,CBL,CTNNB1,ESR1,KRAS | 546 |
| ESR1 | MAP2K1  | CAV1,CBL,ESR1,KRAS,MAP2K1 | 546 |
| ESR1 | MVP     | ESR1,MVP                  | 546 |
| ESR1 | NCAM1   | CNTN2,ESR1,NCAM1          | 546 |
| ESR1 | NPPA    | ESR1,NPPA                 | 546 |
| ESR1 | PDGFRB  | ESR1,KIT,PDGFRB,PIK3R1    | 546 |
| ESR1 | PIK3R1  | ESR1,KIT,PDGFRB,PIK3R1    | 546 |
| ESR1 | PKIA    | ESR1,PKIA                 | 546 |
| ESR1 | PPP2R3A | ESR1,PPP2R3A              | 546 |
| ESR1 | PSMC3   | ESR1,PSMC3                | 546 |
| ESR1 | PTHLH   | ESR1,PTHLH                | 546 |
| ESR1 | PTPRT   | ESR1,PTPRT                | 546 |
| ESR1 | ROS1    | CTNNB1,ESR1,ROS1          | 546 |
| ESR1 | SAMSN1  | ESR1,SAMSN1               | 546 |
| ESR1 | SUZ12   | ESR1,EZH2,SUZ12           | 546 |
| ESR1 | TERT    | ESR1,TERT                 | 546 |
| ESR1 | TG      | ESR1,TG                   | 546 |
| ESR1 | TYMS    | ESR1,TYMS                 | 546 |
| ESR1 | ZNF79   | ESR1,ZNF79                | 546 |
| LYN  | ANGPT1  | ANGPT1,LYN                | 546 |
| LYN  | BLNK    | BLNK,CD72,LYN             | 546 |
| LYN  | BTK     | BTK,LYN                   | 546 |
| LYN  | CASP2   | CASP2,LYN                 | 546 |
| LYN  | CASP9   | CASP9,LYN                 | 546 |
| LYN  | CD36    | CD36,LYN                  | 546 |
| LYN  | CD72    | BLNK,CD72,LYN,PTPRC       | 546 |
| LYN  | CD86    | CD86,LCK,LYN,PTPRC        | 546 |
| LYN  | CDK1    | CDK1,LYN                  | 546 |
| LYN  | CRKL    | CRKL,LYN                  | 546 |
| LYN  | CSF2RB  | CSF2RB,IL5RA,LYN          | 546 |
| LYN  | CSF3    | CSF3,LYN                  | 546 |
| LYN  | CSPG4   | CSPG4,LYN                 | 546 |
| LYN  | DOK1    | CRKL,DOK1,DOK2,LYN        | 546 |
| LYN  | DOK2    | CRKL,DOK2,LYN             | 546 |
| LYN  | EPM2A   | EPM2A,LYN                 | 546 |
| LYN  | FCER2   | FCER2,ITGB2,LYN           | 546 |
| LYN  | FGFR2   | FGFR2,LYN                 | 546 |
| LYN  | FGR     | FGR,LYN                   | 546 |
| LYN  | FHIT    | FHIT,LYN                  | 546 |
| LYN  | FLT3    | FLT3,LYN                  | 546 |
| LYN  | GP1BA   | GP1BA,LCK,LYN             | 546 |
| LYN  | IL5RA   | IL5RA,LYN                 | 546 |
| LYN  | IL6R    | IL6R,LYN                  | 546 |

|      |          |                            |     |
|------|----------|----------------------------|-----|
| LYN  | INPP5D   | CRKL,DOK2,INPP5D,LYN       | 546 |
| LYN  | ITGA4    | CD36,ITGA4,LYN             | 546 |
| LYN  | ITGB2    | CDK1,FCER2,ITGB2,LYN,PTPRC | 546 |
| LYN  | LCK      | LCK,LYN                    | 546 |
| LYN  | LIF      | IL6R,LIF,LYN               | 546 |
| LYN  | MME      | LYN,MME                    | 546 |
| LYN  | MUC1     | LYN,MUC1                   | 546 |
| LYN  | PARP1    | LYN,PARP1,RXRA             | 546 |
| LYN  | POU2F2   | LYN,POU2F2,RXRA            | 546 |
| LYN  | PTPRC    | LCK,LYN,PTPRC              | 546 |
| LYN  | RXRA     | LYN,PARP1,RXRA             | 546 |
| RELA | AATF     | AATF,RELA                  | 546 |
| RELA | ACTBL2   | ACTBL2,RELA                | 546 |
| RELA | AFF1     | AFF1,RELA,VDR              | 546 |
| RELA | BCL3     | BCL3,RELA                  | 546 |
| RELA | CCND2    | CCND2,PSMC3,RELA           | 546 |
| RELA | CDX2     | CDX2,RELA                  | 546 |
| RELA | CHFR     | CHFR,PARP1,RELA            | 546 |
| RELA | CYP24A1  | CYP24A1,RELA               | 546 |
| RELA | EGF      | EGF,RELA                   | 546 |
| RELA | ELF4     | ELF4,NOTCH1,PPARGC1A,RELA  | 546 |
| RELA | FOXP3    | FOXP3,RELA                 | 546 |
| RELA | HLF      | HLF,RELA                   | 546 |
| RELA | IL1B     | IL1B,IRF4,IRF8,RELA        | 546 |
| RELA | IRF4     | IRF4,RELA,STAT6            | 546 |
| RELA | IRF8     | IL1B,IRF8,RELA             | 546 |
| RELA | KLF4     | KLF4,RELA                  | 546 |
| RELA | MAP4K1   | MAP4K1,RELA                | 546 |
| RELA | NCOA6    | NCOA6,RELA                 | 546 |
| RELA | NFKBIB   | NFKBIB,RELA                | 546 |
| RELA | NOTCH1   | NOTCH1,RELA                | 546 |
| RELA | NR4A1    | NR4A1,RELA                 | 546 |
| RELA | PARP1    | PARP1,PBX1,RELA,RXRA,VDR   | 546 |
| RELA | PBX1     | PARP1,PBX1,RELA,RXRA       | 546 |
| RELA | PGR      | PARP1,PGR,RELA,STAT5A      | 546 |
| RELA | PLEKHM1  | PLEKHM1,RELA               | 546 |
| RELA | PPARGC1A | PPARGC1A,RELA              | 546 |
| RELA | PSMC3    | PSMC3,RELA                 | 546 |
| RELA | RUNX1T1  | RELA,RUNX1T1               | 546 |
| RELA | RXRA     | PARP1,PBX1,RELA,RXRA,VDR   | 546 |
| RELA | STAT5A   | RELA,STAT5A                | 546 |
| RELA | STAT6    | IRF4,RELA,STAT6            | 546 |
| RELA | TF       | RELA,TF                    | 546 |

|       |          |                                |     |
|-------|----------|--------------------------------|-----|
| RELA  | VDR      | PARP1,PBX1,RELA,RXRA,VDR       | 546 |
| ESR2  | AFF1     | AFF1,ESR2,MLLT3                | 546 |
| ESR2  | ATM      | ATM,ESR2                       | 546 |
| ESR2  | BAX      | BAX,ESR2                       | 546 |
| ESR2  | BCL11B   | BCL11B,ESR2                    | 546 |
| ESR2  | BIRC5    | BIRC5,ESR2                     | 546 |
| ESR2  | CCR1     | CCR1,ESR2,STAT3                | 546 |
| ESR2  | CD19     | CD19,ESR2                      | 546 |
| ESR2  | CD8A     | CD8A,ESR2                      | 546 |
| ESR2  | CDCA7L   | CDCA7L,ESR2,PBX1               | 546 |
| ESR2  | CHD2     | CHD2,ESR2                      | 546 |
| ESR2  | CNR2     | CNR2,ESR2                      | 546 |
| ESR2  | CTCF     | CTCF,ESR2                      | 546 |
| ESR2  | EDNRA    | EDNRA,ESR2                     | 546 |
| ESR2  | ELL      | ELL,ESR2                       | 546 |
| ESR2  | ETV6     | ESR2,ETV6                      | 546 |
| ESR2  | HBA2     | ESR2,HBA2                      | 546 |
| ESR2  | ICOS     | ESR2,ICOS                      | 546 |
| ESR2  | IL6      | ESR2,IL6,STAT3                 | 546 |
| ESR2  | KMT2C    | ESR2,KMT2C                     | 546 |
| ESR2  | MEIS1    | CDCA7L,ESR2,MEIS1,PBX1         | 546 |
| ESR2  | MLLT3    | ESR2,MLLT3                     | 546 |
| ESR2  | MSH2     | ATM,ESR2,MSH2,STAT3            | 546 |
| ESR2  | NELFCD   | ESR2,NELFCD                    | 546 |
| ESR2  | PBX1     | CDCA7L,ESR2,PBX1               | 546 |
| ESR2  | PPARGC1A | ESR2,PPARGC1A                  | 546 |
| ESR2  | ROS1     | ESR2,ROS1                      | 546 |
| ESR2  | S100A11  | ESR2,S100A11,S100A8            | 546 |
| ESR2  | S100A8   | ESR2,S100A8                    | 546 |
| ESR2  | STAT3    | ESR2,STAT3                     | 546 |
| ESR2  | STAT5A   | ESR2,STAT3,STAT5A              | 546 |
| ESR2  | TCF15    | ESR2,TCF15                     | 546 |
| ESR2  | WTAP     | ESR2,WTAP                      | 546 |
| ITGB1 | ANGPT1   | ANGPT1,ANGPT2,CD9,ITGA5,ITGB1  | 546 |
| ITGB1 | ANGPT2   | ANGPT1,ANGPT2,DOK1,ITGA5,ITGB1 | 546 |
| ITGB1 | CAV1     | CAV1,CBL,ITGB1,KRAS            | 546 |
| ITGB1 | CBL      | CAV1,CBL,ITGB1,KRAS            | 546 |
| ITGB1 | CD2      | CD2,CD58,ITGB1                 | 546 |
| ITGB1 | CD36     | CD36,CD9,ITGB1                 | 546 |
| ITGB1 | CD58     | CD2,CD58,DOK1,ITGB1            | 546 |
| ITGB1 | CD9      | CD36,CD9,ITGB1,KRAS            | 546 |
| ITGB1 | CNR1     | CNR1,ITGB1                     | 546 |
| ITGB1 | CSF2RB   | CSF2RB,ITGB1,JAK2              | 546 |



|       |          |                               |     |
|-------|----------|-------------------------------|-----|
| ITGB1 | CSPG4    | CSPG4,ITGA5,ITGB1             | 546 |
| ITGB1 | CXCL10   | CXCL10,ITGB1                  | 546 |
| ITGB1 | CYP24A1  | CYP24A1,ITGB1                 | 546 |
| ITGB1 | DOK1     | DOK1,ITGB1                    | 546 |
| ITGB1 | FCER2    | FCER2,ITGAX,ITGB1,ITGB2       | 546 |
| ITGB1 | HBEGF    | CAV1,CD9,HBEGF,ITGA4,ITGB1    | 546 |
| ITGB1 | ITGA4    | CD36,ITGA4,ITGB1              | 546 |
| ITGB1 | ITGA5    | CBL,CD9,ITGA5,ITGB1,KRAS      | 546 |
| ITGB1 | ITGAX    | FCER2,ITGAX,ITGB1,ITGB2,PTK2B | 546 |
| ITGB1 | ITGB2    | FCER2,ITGAX,ITGB1,ITGB2       | 546 |
| ITGB1 | JAK2     | CAV1,ITGB1,JAK2,KRAS          | 546 |
| ITGB1 | JUP      | CAV1,ITGB1,JUP,KRAS           | 546 |
| ITGB1 | KRAS     | CAV1,CBL,ITGB1,KRAS           | 546 |
| ITGB1 | MAP2K1   | CAV1,CBL,ITGB1,KRAS,MAP2K1    | 546 |
| ITGB1 | MPL      | ITGB1,JAK2,MPL                | 546 |
| ITGB1 | PICALM   | ITGB1,PICALM                  | 546 |
| ITGB1 | PLXNA2   | ITGA5,ITGB1,PLXNA2            | 546 |
| ITGB1 | PTK2B    | ITGB1,PTK2B                   | 546 |
| ITGB1 | SDC1     | CD9,ITGB1,SDC1                | 546 |
| ITGB1 | SLC22A2  | CD9,ITGB1,SLC22A2             | 546 |
| ITGB1 | TNFRSF1B | ITGB1,TNFRSF1B                | 546 |
| ITGB1 | TNFSF13B | ITGB1,TNFSF13B                | 546 |
| TRAF6 | BIRC2    | BIRC2,TRAF6                   | 546 |
| TRAF6 | BIRC3    | BIRC3,NFKB1,RAN,TRAF6         | 546 |
| TRAF6 | CARD11   | CARD11,TRAF6                  | 546 |
| TRAF6 | CD40     | BIRC2,CD40,PIK3R1,TRAF6       | 546 |
| TRAF6 | CSF2RB   | CSF2RB,KIT,PIK3R1,TRAF6       | 546 |
| TRAF6 | DCT      | DCT,TRAF6                     | 546 |
| TRAF6 | EPO      | EPO,TRAF6                     | 546 |
| TRAF6 | GUCY2D   | GUCY2D,PIK3R1,TRAF6           | 546 |
| TRAF6 | IRAK1    | IRAK1,MYD88,TRAF6             | 546 |
| TRAF6 | IRF8     | IRF8,NFKB1,PTPN11,TRAF6       | 546 |
| TRAF6 | KIT      | KIT,PDGFRB,PIK3R1,TRAF6       | 546 |
| TRAF6 | LTA      | BIRC2,LTA,TRAF6               | 546 |
| TRAF6 | MAT1A    | MAT1A,MAT2A,TRAF6             | 546 |
| TRAF6 | MAT2A    | MAT1A,MAT2A,TRAF6             | 546 |
| TRAF6 | MBP      | IRAK1,MBP,TRAF6               | 546 |
| TRAF6 | MPL      | MPL,TRAF6                     | 546 |
| TRAF6 | MVP      | MVP,PARP4,TRAF6               | 546 |
| TRAF6 | MYD88    | IRAK1,MYD88,TRAF6             | 546 |
| TRAF6 | MYO1G    | MYO1G,NFKB1,TFRC,TRAF6        | 546 |
| TRAF6 | NFKB1    | NFKB1,RAN,TRAF6               | 546 |
| TRAF6 | PARP4    | MVP,PARP4,TRAF6               | 546 |

|       |         |                                 |     |
|-------|---------|---------------------------------|-----|
| TRAF6 | PDGFRB  | KIT,PDGFRB,PIK3R1,TRAF6         | 546 |
| TRAF6 | PIK3R1  | KIT,PDGFRB,PIK3R1,TRAF6         | 546 |
| TRAF6 | PTPN11  | PIK3R1,PTPN11,TRAF6             | 546 |
| TRAF6 | RAN     | NFKB1,RAN,TRAF6                 | 546 |
| TRAF6 | RASGRP3 | RASGRP3,TRAF6                   | 546 |
| TRAF6 | SIGLEC9 | BIRC2,MYD88,SIGLEC9,TRAF6       | 546 |
| TRAF6 | ST13    | IRAK1,ST13,TRAF6                | 546 |
| TRAF6 | TFRC    | TFRC,TRAF6                      | 546 |
| TRAF6 | WBP1L   | RAN,TRAF6,WBP1L                 | 546 |
| TRAF6 | WNT5A   | TRAF6,WNT5A                     | 546 |
| PRKCA | ACTBL2  | ACTBL2,PRKCA                    | 546 |
| PRKCA | BCL2L1  | BCL2L1,MAPK1,PRKCA              | 546 |
| PRKCA | CAD     | CAD,PRKCA                       | 546 |
| PRKCA | CD4     | CD4,PRKCA,PRKCQ                 | 546 |
| PRKCA | CD58    | CD4,CD58,PRKCA                  | 546 |
| PRKCA | CEACAM1 | CEACAM1,EGFR,PRKCA              | 546 |
| PRKCA | EGFR    | EGFR,PRKCA,SRC                  | 546 |
| PRKCA | F2RL1   | F2RL1,GNAS,PRKCA                | 546 |
| PRKCA | FCGR3A  | CD4,FCGR3A,PRKCA                | 546 |
| PRKCA | GC      | GC,PRKCA                        | 546 |
| PRKCA | GNAS    | F2RL1,GNAS,PRKCA                | 546 |
| PRKCA | HRAS    | HRAS,MAPK1,MAPK3,PRKCA          | 546 |
| PRKCA | HSPB1   | BCL2L1,HSPB1,PRKCA              | 546 |
| PRKCA | LMOD1   | LMOD1,PRKCA                     | 546 |
| PRKCA | MAPK1   | HRAS,MAPK1,MAPK3,PRKCA          | 546 |
| PRKCA | MAPK3   | HRAS,MAPK1,MAPK3,PRKCA          | 546 |
| PRKCA | MAPK8   | MAPK1,MAPK8,PRKCA               | 546 |
| PRKCA | MBP     | HRAS,MAPK1,MAPK3,MBP,PRKCA,RAF1 | 546 |
| PRKCA | MRC2    | MRC2,PRKCA,RAF1                 | 546 |
| PRKCA | MUSK    | MAPK1,MUSK,PRKCA                | 546 |
| PRKCA | PIK3CA  | PIK3CA,PRKCA,SRC                | 546 |
| PRKCA | PIM1    | EGFR,PIM1,PRKCA                 | 546 |
| PRKCA | PRKCQ   | PRKCA,PRKCQ                     | 546 |
| PRKCA | RAF1    | PRKCA,RAF1                      | 546 |
| PRKCA | SI      | PRKCA,SI                        | 546 |
| PRKCA | SLC22A2 | PRKCA,SLC22A2                   | 546 |
| PRKCA | SLC8A1  | PRKCA,SLC8A1                    | 546 |
| PRKCA | SRC     | PRKCA,SRC                       | 546 |
| PRKCA | STX4    | HRAS,PRKCA,STX4,VAMP2           | 546 |
| PRKCA | VAMP2   | HRAS,PRKCA,STX4,VAMP2           | 546 |

**Sample 629**

| <b>Candidate AML genes</b> | <b>Known AML genes</b><br>(of which the module includes candidate AML genes) | <b>ALL the AML genes involved in current module</b> | <b>Sample-ID</b> |
|----------------------------|------------------------------------------------------------------------------|-----------------------------------------------------|------------------|
| ESR1                       | ANKRD49                                                                      | ANKRD49,ESR1                                        | 629              |
| ESR1                       | BCL3                                                                         | BCL3,ESR1                                           | 629              |
| ESR1                       | CAD                                                                          | CAD,ESR1                                            | 629              |
| ESR1                       | CHD2                                                                         | CHD2,ESR1                                           | 629              |
| ESR1                       | CNTN2                                                                        | CNTN2,ESR1,NCAM1                                    | 629              |
| ESR1                       | DCT                                                                          | DCT,ESR1                                            | 629              |
| ESR1                       | DNTT                                                                         | DNTT,ESR1                                           | 629              |
| ESR1                       | ECT2L                                                                        | ECT2L,ESR1                                          | 629              |
| ESR1                       | EGF                                                                          | EGF,ESR1                                            | 629              |
| ESR1                       | HIF1A                                                                        | ESR1,HIF1A                                          | 629              |
| ESR1                       | HNF4A                                                                        | ESR1,HNF4A,NR3C1,PGR,RORA                           | 629              |
| ESR1                       | HSPA8                                                                        | ESR1,HSPA8                                          | 629              |
| ESR1                       | LPL                                                                          | ESR1,HSPA8,LPL                                      | 629              |
| ESR1                       | MPL                                                                          | ESR1,MPL                                            | 629              |
| ESR1                       | MVP                                                                          | ESR1,MVP,TP53                                       | 629              |
| ESR1                       | NCAM1                                                                        | CNTN2,ESR1,NCAM1                                    | 629              |
| ESR1                       | NPPA                                                                         | ESR1,HNF4A,NPPA                                     | 629              |
| ESR1                       | NR3C1                                                                        | ESR1,HNF4A,NR3C1,PGR,RORA                           | 629              |
| ESR1                       | PACSIN3                                                                      | ESR1,HSPA8,PACSIN3                                  | 629              |
| ESR1                       | PGR                                                                          | ESR1,HNF4A,NR3C1,PGR,RORA                           | 629              |
| ESR1                       | PIK3CA                                                                       | ESR1,PIK3CA                                         | 629              |
| ESR1                       | RAG2                                                                         | ESR1,RAG2,TP53                                      | 629              |
| ESR1                       | RORA                                                                         | ESR1,HIF1A,HNF4A,NR3C1,PGR,RORA                     | 629              |
| ESR1                       | RTKN                                                                         | ESR1,RTKN                                           | 629              |
| ESR1                       | RXRA                                                                         | ESR1,RXRA,XIAP                                      | 629              |
| ESR1                       | SDC1                                                                         | ESR1,SDC1                                           | 629              |
| ESR1                       | SET                                                                          | ESR1,SET                                            | 629              |
| ESR1                       | STAT5A                                                                       | ESR1,STAT5A                                         | 629              |
| ESR1                       | TF                                                                           | ESR1,TF                                             | 629              |
| ESR1                       | TP53                                                                         | ESR1,TP53                                           | 629              |
| ESR1                       | XIAP                                                                         | ESR1,RXRA,XIAP                                      | 629              |
| ESR1                       | ZNF79                                                                        | ESR1,ZNF79                                          | 629              |
| FLNA                       | ABL1                                                                         | ABL1,BRCA1,DOK2,FLNA,HSP90AA1,PIK3R1                | 629              |
| FLNA                       | AZGP1                                                                        | AZGP1,FLNA                                          | 629              |
| FLNA                       | BIRC3                                                                        | BIRC3,FLNA                                          | 629              |
| FLNA                       | BRCA1                                                                        | BRCA1,FLNA,HSP90AA1,PIK3R1                          | 629              |
| FLNA                       | CAV1                                                                         | CAV1,FLNA                                           | 629              |
| FLNA                       | CD36                                                                         | CD36,FLNA                                           | 629              |
| FLNA                       | CD44                                                                         | CD44,FLNA,ITGA4                                     | 629              |
| FLNA                       | CEACAM1                                                                      | CEACAM1,FLNA,Src                                    | 629              |

|      |          |                                     |     |
|------|----------|-------------------------------------|-----|
| FLNA | CHD2     | CHD2,FLNA                           | 629 |
| FLNA | CLTC     | CLTC,FLNA                           | 629 |
| FLNA | DOK2     | DOK2,FLNA,SRC                       | 629 |
| FLNA | ETNK1    | ETNK1,FLNA                          | 629 |
| FLNA | GGH      | FLNA,GGH                            | 629 |
| FLNA | GNAI1    | FLNA,GNAI1                          | 629 |
| FLNA | HSP90AA1 | FLNA,HSP90AA1                       | 629 |
| FLNA | HSPA8    | FLNA,HSPA8                          | 629 |
| FLNA | ILK      | FLNA,ILK                            | 629 |
| FLNA | ITGA4    | FLNA,ITGA4                          | 629 |
| FLNA | KRAS     | FLNA,KRAS                           | 629 |
| FLNA | MAPK14   | FLNA,MAPK14                         | 629 |
| FLNA | MYH11    | FLNA,MYH11                          | 629 |
| FLNA | PFDN4    | FLNA,PFDN4                          | 629 |
| FLNA | PIK3R1   | FLNA,PIK3R1                         | 629 |
| FLNA | PKIA     | FLNA,HSP90AA1,PKIA                  | 629 |
| FLNA | PPARG    | FLNA,PPARG                          | 629 |
| FLNA | PTEN     | FLNA,HSP90AA1,PIK3R1,PTEN           | 629 |
| FLNA | PTK2B    | FLNA,HSP90AA1,PTK2B                 | 629 |
| FLNA | RASA1    | FLNA,RASA1                          | 629 |
| FLNA | SELL     | FLNA,SELL                           | 629 |
| FLNA | SRC      | FLNA,PIK3R1,SRC                     | 629 |
| FLNA | TP53     | FLNA,TP53                           | 629 |
| FLNA | WTAP     | FLNA,WTAP                           | 629 |
| FYN  | ANPEP    | ANPEP,CD9,FYN                       | 629 |
| FYN  | BTK      | BTK,CD19,CD22,CD79A,CD9,CR2,FYN,SYK | 629 |
| FYN  | CARD11   | CARD11,FYN,PRKCQ,ZAP70              | 629 |
| FYN  | CD19     | CD19,CD22,CD79A,CD9,CR2,FYN,SYK     | 629 |
| FYN  | CD2      | CD2,CD5,CD58,FYN                    | 629 |
| FYN  | CD22     | CD19,CD22,CD79A,CD9,CR2,FYN,SYK     | 629 |
| FYN  | CD5      | CD2,CD5,CD58,CD72,CD79A,FYN,ZAP70   | 629 |
| FYN  | CD58     | CD2,CD5,CD58,FYN                    | 629 |
| FYN  | CD72     | CD2,CD5,CD72,CD79A,FYN,SYK,ZAP70    | 629 |
| FYN  | CD79A    | CD19,CD22,CD79A,CD9,CR2,FYN         | 629 |
| FYN  | CD86     | CD86,CTLA4,FYN                      | 629 |
| FYN  | CD9      | BTK,CD19,CD22,CD79A,CD9,CR2,FYN,SYK | 629 |
| FYN  | CR2      | CD19,CD22,CD9,CR2,FYN,SYK           | 629 |
| FYN  | CSF1R    | CSF1R,FYN,SRC                       | 629 |
| FYN  | CSF2RB   | CSF2RB,FYN,SRC,SYK                  | 629 |
| FYN  | CTLA4    | CD86,CTLA4,FYN                      | 629 |
| FYN  | DLX4     | DLX4,FYN,SRC                        | 629 |
| FYN  | DOK1     | DOK1,FYN,SRC                        | 629 |
| FYN  | FLT1     | FLT1,FYN                            | 629 |

|      |           |                                                   |     |
|------|-----------|---------------------------------------------------|-----|
| FYN  | GUCY2D    | FYN,GUCY2D                                        | 629 |
| FYN  | IL2RB     | FYN,IL2RB,IL7R                                    | 629 |
| FYN  | IL6ST     | FYN,IL6ST,LIFR                                    | 629 |
| FYN  | IL7R      | FYN,IL2RB,IL7R,MS4A1                              | 629 |
| FYN  | LIFR      | FYN,IL6ST,LIFR                                    | 629 |
| FYN  | MAP4K1    | FYN,MAP4K1                                        | 629 |
| FYN  | MS4A1     | FYN,IL7R,MS4A1                                    | 629 |
| FYN  | PKIA      | FYN,PKIA                                          | 629 |
| FYN  | PRKCQ     | BTK,FYN,PRKCQ                                     | 629 |
| FYN  | RAPGEF1   | FYN,RAPGEF1,SRC                                   | 629 |
| FYN  | RHOH      | CARD11,FYN,RHOH,ZAP70                             | 629 |
| FYN  | SPN       | FYN,SPN                                           | 629 |
| FYN  | SRC       | FYN,SRC                                           | 629 |
| FYN  | SYK       | BTK,CD19,CD22,CD79A,CD9,CR2,FYN,SYK               | 629 |
| FYN  | THY1      | FYN,THY1                                          | 629 |
| FYN  | TNFRSF10B | FYN,TNFRSF10B                                     | 629 |
| FYN  | ZAP70     | FYN,ZAP70                                         | 629 |
| GRB2 | ANGPT1    | ANGPT1,GRB2                                       | 629 |
| GRB2 | ASXL1     | ASXL1,GRB2,STAT3                                  | 629 |
| GRB2 | BAD       | BAD,GRB2                                          | 629 |
| GRB2 | BCR       | BCR,CBL,GRB2,JAK2                                 | 629 |
| GRB2 | BLNK      | BLNK,BTK,CBL,CD72,GRB2,SYK                        | 629 |
| GRB2 | BTK       | BTK,CBL,CD19,CD22,CD9,GRB2,SYK                    | 629 |
| GRB2 | CASP2     | CASP2,GRB2                                        | 629 |
| GRB2 | CBL       | CBL,CD19,GRB2,JAK2,STAT3                          | 629 |
| GRB2 | CCR5      | CCR5,CD4,GRB2,LCK,STAT3                           | 629 |
| GRB2 | CD19      | CBL,CD19,CD22,CD9,GRB2,SYK                        | 629 |
| GRB2 | CD1A      | CD1A,GRB2                                         | 629 |
| GRB2 | CD22      | CBL,CD19,CD22,CD9,GRB2,PTPRC,SYK                  | 629 |
| GRB2 | CD36      | CD36,CD9,GRB2                                     | 629 |
| GRB2 | CD4       | CD4,CD86,GRB2,LCK,PIK3CA,PTPRC                    | 629 |
| GRB2 | CD72      | BLNK,CD4,CD72,GRB2,LCK,SYK,ZAP70                  | 629 |
| GRB2 | CD86      | CD4,CD86,GRB2,LCK,PIK3CA,PTPRC                    | 629 |
| GRB2 | CD9       | BTK,CBL,CD19,CD22,CD9,GRB2,SYK                    | 629 |
| GRB2 | CDKN1B    | CDKN1B,GRB2,JAK2                                  | 629 |
| GRB2 | CSF1R     | CBL,CSF1R,GRB2,KIT,SOCS1,SRC                      | 629 |
| GRB2 | CSF2RB    | CSF2RB,EPO,EPOR,GRB2,JAK2,KIT,KITLG,PTPRC,SRC,SYK | 629 |
| GRB2 | CSF3      | CSF3,GRB2,JAK1,JAK2,STAT3,SYK                     | 629 |
| GRB2 | DLX4      | DLX4,GRB2,SRC                                     | 629 |
| GRB2 | DOK1      | DOK1,GRB2,INPP5D,SRC                              | 629 |
| GRB2 | E2F1      | E2F1,GRB2                                         | 629 |
| GRB2 | EGF       | EGF,FGFR2,GAPDH,GRB2                              | 629 |

|      |         |                                                           |     |
|------|---------|-----------------------------------------------------------|-----|
| GRB2 | EPO     | CBL,CSF2RB,EPO,EPOR,GRB2,JAK2,KIT,KITLG,PTPRC,SRC,SYK     | 629 |
| GRB2 | EPOR    | EPO,EPOR,GRB2,PTPRC,SRC                                   | 629 |
| GRB2 | ETV6    | ETV6,GRB2,SOCS1                                           | 629 |
| GRB2 | FASLG   | FASLG,GRB2,SRC                                            | 629 |
| GRB2 | FGFR2   | FGFR2,GRB2,STAT3                                          | 629 |
| GRB2 | FLT1    | CBL,FLT1,GRB2,STAT3                                       | 629 |
| GRB2 | FLT3    | CASP2,CBL,FLT3,GRB2,KITLG                                 | 629 |
| GRB2 | GAPDH   | GAPDH,GRB2                                                | 629 |
| GRB2 | GC      | CBL,GC,GRB2,TF                                            | 629 |
| GRB2 | GFAP    | GFAP,GRB2                                                 | 629 |
| GRB2 | ICOS    | GAPDH,GRB2,ICOS,KIT,SOCS1                                 | 629 |
| GRB2 | IL15    | GRB2,IL15,IL2RB,IL2RG                                     | 629 |
| GRB2 | IL2RB   | GRB2,IL15,IL2RB,IL2RG,STAT3                               | 629 |
| GRB2 | IL2RG   | GRB2,IL2RB,IL2RG,JAK2                                     | 629 |
| GRB2 | IL5RA   | GRB2,IL5RA,JAK2,PTPN11,RAPGEF1                            | 629 |
| GRB2 | IL6ST   | GRB2,IL6ST,JAK2,LIFR,STAT3                                | 629 |
| GRB2 | ILK     | GRB2,ILK,LCK,ZAP70                                        | 629 |
| GRB2 | INPP5D  | CBL,GRB2,INPP5D,JAK1                                      | 629 |
| GRB2 | JAK1    | GRB2,INPP5D,JAK1,JAK2,STAT3                               | 629 |
| GRB2 | JAK2    | CDKN1B,GRB2,JAK2,STAT3                                    | 629 |
| GRB2 | KIT     | CSF2RB,EPO,EPOR,GRB2,INPP5D,KIT,KITLG,PTPRC,SRC,SYK,ZAP70 | 629 |
| GRB2 | KITLG   | BCR,CSF2RB,EPOR,FLT3,GRB2,KIT,KITLG,PTPN11,PTPRC,SOCS1    | 629 |
| GRB2 | LCK     | CD4,CD86,FASLG,GRB2,LCK,PIK3CA,PTPRC,ZAP70                | 629 |
| GRB2 | LIFR    | GRB2,IL6ST,LIFR                                           | 629 |
| GRB2 | MAP4K1  | GRB2,MAP4K1                                               | 629 |
| GRB2 | MAPK14  | GRB2,MAPK14,ZAP70                                         | 629 |
| GRB2 | MUC1    | GRB2,MUC1,SRC                                             | 629 |
| GRB2 | MUSK    | GRB2,MUSK                                                 | 629 |
| GRB2 | MYH11   | GRB2,MYH11                                                | 629 |
| GRB2 | NISCH   | GRB2,NISCH                                                | 629 |
| GRB2 | NOS2    | GRB2,NOS2                                                 | 629 |
| GRB2 | PIK3CA  | GRB2,PIK3CA                                               | 629 |
| GRB2 | PPARG   | GRB2,PPARG                                                | 629 |
| GRB2 | PTPN11  | DOK1,E2F1,GRB2,ILK,PTPN11,SOCS1,STAT3                     | 629 |
| GRB2 | PTPRC   | CD4,CD86,GRB2,LCK,PIK3CA,PTPRC                            | 629 |
| GRB2 | RAPGEF1 | CBL,GRB2,RAPGEF1,SRC                                      | 629 |
| GRB2 | SLC8A1  | GRB2,SLC8A1                                               | 629 |
| GRB2 | SOCS1   | GRB2,SOCS1                                                | 629 |
| GRB2 | SRC     | GRB2,INPP5D,SRC                                           | 629 |

|       |         |                                |     |
|-------|---------|--------------------------------|-----|
| GRB2  | STAT3   | GRB2,JAK2,STAT3                | 629 |
| GRB2  | SYK     | BTK,CBL,CD19,CD22,CD9,GRB2,SYK | 629 |
| GRB2  | SYNJ1   | GRB2,SYNJ1                     | 629 |
| GRB2  | TF      | GRB2,TF                        | 629 |
| GRB2  | ZAP70   | GRB2,ZAP70                     | 629 |
| HDAC1 | AFF1    | AFF1,HDAC1                     | 629 |
| HDAC1 | ANKRD49 | ANKRD49,EZH2,HDAC1             | 629 |
| HDAC1 | APEX1   | APEX1,HDAC1                    | 629 |
| HDAC1 | BCL11B  | BCL11B,HDAC1                   | 629 |
| HDAC1 | BCL3    | BCL3,HDAC1,TBL1XR1             | 629 |
| HDAC1 | CBFB    | CBFB,HDAC1                     | 629 |
| HDAC1 | CDK1    | CDK1,EZH2,HDAC1                | 629 |
| HDAC1 | CHFR    | CHFR,HDAC1                     | 629 |
| HDAC1 | CTCF    | CTCF,HDAC1                     | 629 |
| HDAC1 | DNMT1   | DNMT1,HDAC1                    | 629 |
| HDAC1 | DNTT    | DNTT,HDAC1                     | 629 |
| HDAC1 | EZH2    | CDK1,EZH2,HDAC1,SF3B1          | 629 |
| HDAC1 | FBXW7   | FBXW7,HDAC1,ZMYM2              | 629 |
| HDAC1 | FOXP3   | FOXP3,HDAC1                    | 629 |
| HDAC1 | HDAC9   | HDAC1,HDAC9                    | 629 |
| HDAC1 | HOXA9   | HDAC1,HOXA9,MEIS1              | 629 |
| HDAC1 | KLF4    | HDAC1,KLF4                     | 629 |
| HDAC1 | MECOM   | HDAC1,MECOM                    | 629 |
| HDAC1 | MEIS1   | HDAC1,HOXA9,MEIS1              | 629 |
| HDAC1 | PFDN4   | HDAC1,PFDN4                    | 629 |
| HDAC1 | PHF6    | HDAC1,PHF6                     | 629 |
| HDAC1 | PPARG   | HDAC1,PPARG                    | 629 |
| HDAC1 | RUNX1T1 | HDAC1,RUNX1T1                  | 629 |
| HDAC1 | SALL4   | HDAC1,SALL4                    | 629 |
| HDAC1 | SAMSN1  | HDAC1,SAMSN1                   | 629 |
| HDAC1 | SETD2   | DNMT1,FBXW7,HDAC1,SETD2        | 629 |
| HDAC1 | SF3B1   | HDAC1,SF3B1                    | 629 |
| HDAC1 | SLC3A1  | HDAC1,SLC3A1                   | 629 |
| HDAC1 | SRSF2   | HDAC1,SRSF2                    | 629 |
| HDAC1 | TAL1    | HDAC1,TAL1                     | 629 |
| HDAC1 | TBL1XR1 | HDAC1,TBL1XR1                  | 629 |
| HDAC1 | UIMC1   | HDAC1,UIMC1                    | 629 |
| HDAC1 | ZMYM2   | CTCF,HDAC1,ZMYM2               | 629 |
| HDAC1 | ZNF79   | HDAC1,MECOM,ZNF79              | 629 |
| LYN   | ANGPT1  | ANGPT1,ANGPT2,LYN              | 629 |
| LYN   | ANGPT2  | ANGPT1,ANGPT2,LYN              | 629 |
| LYN   | BLNK    | BLNK,BTK,CD72,CRKL,LYN,SYK     | 629 |
| LYN   | BTK     | BTK,CD19,CD22,CD9,LYN,SYK      | 629 |

|      |        |                                |     |
|------|--------|--------------------------------|-----|
| LYN  | CASP9  | CASP9,LYN                      | 629 |
| LYN  | CD19   | CD19,CD22,CD9,LYN,SYK          | 629 |
| LYN  | CD22   | CD19,CD22,CD9,LYN,SYK          | 629 |
| LYN  | CD36   | CD36,CD9,LYN                   | 629 |
| LYN  | CD72   | BLNK,CD72,LYN,SYK              | 629 |
| LYN  | CD9    | BTK,CD19,CD22,CD9,LYN,SYK      | 629 |
| LYN  | CRKL   | CRKL,DOK1,LYN,SRC              | 629 |
| LYN  | CSF2RB | CSF2RB,KITLG,LYN,SRC,SYK       | 629 |
| LYN  | CSF3   | CSF3,LYN,SYK                   | 629 |
| LYN  | CTLA4  | CTLA4,LYN                      | 629 |
| LYN  | DOK1   | CRKL,DOK1,INPP5D,LYN,SRC       | 629 |
| LYN  | FGR    | FGR,INPP5D,LYN,SRC             | 629 |
| LYN  | GP1BA  | GP1BA,ITGAM,LYN,SRC,SYK        | 629 |
| LYN  | IL1B   | IL1B,LYN,PDGFRB,SRC            | 629 |
| LYN  | IL5RA  | IL5RA,LYN                      | 629 |
| LYN  | IL6    | IL6,LYN                        | 629 |
| LYN  | IL7R   | IL7R,LYN,MS4A1                 | 629 |
| LYN  | INPP5D | CRKL,INPP5D,LYN                | 629 |
| LYN  | ITGAM  | GP1BA,ITGAM,LYN,SRC,SYK        | 629 |
| LYN  | ITGAX  | ITGAX,LYN,SYK                  | 629 |
| LYN  | KITLG  | CSF2RB,KITLG,LYN               | 629 |
| LYN  | LIF    | IL6,LIF,LYN                    | 629 |
| LYN  | LPL    | LPL,LYN                        | 629 |
| LYN  | MS4A1  | IL7R,LYN,MS4A1                 | 629 |
| LYN  | PDGFRB | IL1B,LYN,PDGFRB,SRC            | 629 |
| LYN  | POU2F2 | LYN,POU2F2                     | 629 |
| LYN  | PRKCQ  | BTK,LYN,PRKCQ                  | 629 |
| LYN  | SRC    | INPP5D,LYN,SRC                 | 629 |
| LYN  | SYK    | BTK,CD19,CD22,CD9,LYN,SYK      | 629 |
| SHC1 | AMD1   | AMD1,SHC1                      | 629 |
| SHC1 | BCR    | BCR,JAK2,RB1,SHC1              | 629 |
| SHC1 | CLPB   | CLPB,SHC1                      | 629 |
| SHC1 | CSF1R  | CSF1R,FGFR1,SHC1               | 629 |
| SHC1 | DOK1   | DOK1,DOK2,SHC1                 | 629 |
| SHC1 | DOK2   | DOK2,SHC1                      | 629 |
| SHC1 | FCGR3A | FCGR3A,SHC1                    | 629 |
| SHC1 | FGFR1  | FGFR1,SHC1                     | 629 |
| SHC1 | FGFR2  | FGFR1,FGFR2,SHC1               | 629 |
| SHC1 | FLT1   | FLT1,SHC1                      | 629 |
| SHC1 | FLT3   | FLT3,SHC1                      | 629 |
| SHC1 | GHR    | GHR,SHC1                       | 629 |
| SHC1 | IL15   | IL15,IL2RB,IL2RG,IL4,SHC1      | 629 |
| SHC1 | IL2RB  | IL15,IL2RB,IL2RG,IL4,IL4R,SHC1 | 629 |



|       |          |                                |     |
|-------|----------|--------------------------------|-----|
| SHC1  | IL2RG    | IL2RB,IL2RG,IL4,IL4R,JAK2,SHC1 | 629 |
| SHC1  | IL4      | IL2RB,IL2RG,IL4,IL4R,SHC1      | 629 |
| SHC1  | IL4R     | IL2RG,IL4,IL4R,JAK2,SHC1       | 629 |
| SHC1  | JAK2     | JAK2,SHC1                      | 629 |
| SHC1  | LRP1     | LRP1,SHC1                      | 629 |
| SHC1  | MAPKAPK2 | MAPKAPK2,SHC1                  | 629 |
| SHC1  | MAT1A    | MAT1A,MAT2A,SHC1               | 629 |
| SHC1  | MAT2A    | MAT1A,MAT2A,SHC1               | 629 |
| SHC1  | MME      | MME,SHC1                       | 629 |
| SHC1  | MPL      | JAK2,MPL,SHC1                  | 629 |
| SHC1  | MYH11    | MYH11,SHC1                     | 629 |
| SHC1  | NF1      | NF1,SHC1                       | 629 |
| SHC1  | PTPN11   | DOK1,PTPN11,SHC1               | 629 |
| SHC1  | RAPGEF1  | RAPGEF1,SHC1                   | 629 |
| SHC1  | RB1      | RB1,SHC1                       | 629 |
| SHC1  | TET1     | SHC1,TET1                      | 629 |
| STAT1 | AKT1     | AKT1,STAT1                     | 629 |
| STAT1 | ATM      | ATM,STAT1                      | 629 |
| STAT1 | CASP3    | AKT1,CASP3,STAT1               | 629 |
| STAT1 | CCR1     | CCR1,STAT1                     | 629 |
| STAT1 | CCR5     | CCR5,CXCR4,LCK,STAT1           | 629 |
| STAT1 | CD40     | CD40,STAT1                     | 629 |
| STAT1 | CXCR4    | CXCR4,STAT1                    | 629 |
| STAT1 | FLT1     | FLT1,KDR,STAT1                 | 629 |
| STAT1 | FOS      | FOS,STAT1                      | 629 |
| STAT1 | FOXP3    | FOXP3,STAT1                    | 629 |
| STAT1 | GFAP     | AKT1,GFAP,STAT1                | 629 |
| STAT1 | HPS4     | HPS4,PIK3CA,STAT1              | 629 |
| STAT1 | HSPA4L   | HSPA4L,STAT1                   | 629 |
| STAT1 | IFNAR2   | IFNAR2,STAT1                   | 629 |
| STAT1 | IFNG     | FOS,IFNG,JAK2,PTPN11,STAT1     | 629 |
| STAT1 | IL1B     | AKT1,IL1B,IRAK1,PDGFRB,STAT1   | 629 |
| STAT1 | IL2RA    | IL2RA,STAT1,TBX21              | 629 |
| STAT1 | IL2RG    | IL2RG,JAK2,STAT1               | 629 |
| STAT1 | IRAK1    | AKT1,IL1B,IRAK1,STAT1          | 629 |
| STAT1 | IRF8     | IL1B,IRF8,PTPN11,STAT1         | 629 |
| STAT1 | JAK1     | JAK1,JAK2,STAT1                | 629 |
| STAT1 | JAK2     | JAK2,NFKBIA,STAT1              | 629 |
| STAT1 | KDR      | KDR,STAT1                      | 629 |
| STAT1 | KIT      | KIT,STAT1                      | 629 |
| STAT1 | LCK      | LCK,PIK3CA,STAT1               | 629 |
| STAT1 | MYC      | MYC,STAT1                      | 629 |
| STAT1 | NFKBIA   | AKT1,NFKBIA,STAT1,XPO1         | 629 |

|       |        |                              |     |
|-------|--------|------------------------------|-----|
| STAT1 | PDGFRB | AKT1,IL1B,IRAK1,PDGFRB,STAT1 | 629 |
| STAT1 | PIK3CA | AKT1,PIK3CA,STAT1            | 629 |
| STAT1 | PSMC3  | PSMC3,STAT1                  | 629 |
| STAT1 | PTPN11 | AKT1,PSMC3,PTPN11,STAT1      | 629 |
| STAT1 | STAT5A | STAT1,STAT5A                 | 629 |
| STAT1 | TBX21  | IL2RA,STAT1,TBX21            | 629 |
| STAT1 | TP73   | STAT1,TP73,XPO1              | 629 |
| STAT1 | XPO1   | STAT1,XPO1                   | 629 |

### **Sample 773**

| <b>Candidate<br/>AML genes</b> | <b>Known AML genes</b><br>(of which the module includes<br>candidate AML genes) | <b>ALL the AML genes involved in current<br/>module</b> | <b>Sample-<br/>ID</b> |
|--------------------------------|---------------------------------------------------------------------------------|---------------------------------------------------------|-----------------------|
| ESR1                           | AKT1                                                                            | AKT1,ESR1                                               | 773                   |
| ESR1                           | ANKRD49                                                                         | ANKRD49,ESR1,EZH2                                       | 773                   |
| ESR1                           | BCR                                                                             | BCR,ESR1,PTPN11                                         | 773                   |
| ESR1                           | BIRC5                                                                           | BIRC5,ESR1,XIAP                                         | 773                   |
| ESR1                           | BLNK                                                                            | BLNK,ESR1,KIT,PDGFRB                                    | 773                   |
| ESR1                           | CAD                                                                             | CAD,ESR1,XPO1                                           | 773                   |
| ESR1                           | CASP3                                                                           | CASP3,CTNNB1,ESR1                                       | 773                   |
| ESR1                           | CBL                                                                             | CBL,ESR1                                                | 773                   |
| ESR1                           | CCR5                                                                            | CCR5,ESR1                                               | 773                   |
| ESR1                           | CHD2                                                                            | CHD2,ESR1                                               | 773                   |
| ESR1                           | CNTN2                                                                           | CNTN2,ESR1,NCAM1                                        | 773                   |
| ESR1                           | COX10                                                                           | COX10,ESR1                                              | 773                   |
| ESR1                           | CTNNB1                                                                          | CTNNB1,ESR1                                             | 773                   |
| ESR1                           | DIABLO                                                                          | DIABLO,ESR1                                             | 773                   |
| ESR1                           | DLX4                                                                            | DLX4,ESR1,NFKB1                                         | 773                   |
| ESR1                           | EDNRA                                                                           | EDNRA,ESR1                                              | 773                   |
| ESR1                           | ETV6                                                                            | ESR1,ETV6                                               | 773                   |
| ESR1                           | EZH2                                                                            | ESR1,EZH2,RARA                                          | 773                   |
| ESR1                           | GGH                                                                             | ESR1,GGH                                                | 773                   |
| ESR1                           | HBA2                                                                            | ESR1,HBA2,HBB                                           | 773                   |
| ESR1                           | HBB                                                                             | ESR1,HBA2,HBB                                           | 773                   |
| ESR1                           | KIT                                                                             | ESR1,KIT,PDGFRB                                         | 773                   |
| ESR1                           | MAPKAPK2                                                                        | CTNNB1,ESR1,MAPKAPK2                                    | 773                   |
| ESR1                           | MVP                                                                             | ESR1,MVP                                                | 773                   |
| ESR1                           | NCAM1                                                                           | CNTN2,ESR1,NCAM1                                        | 773                   |
| ESR1                           | NFKB1                                                                           | ESR1,NFKB1                                              | 773                   |
| ESR1                           | NME2                                                                            | ESR1,NME2,VIM                                           | 773                   |
| ESR1                           | NPM1                                                                            | ESR1,NPM1                                               | 773                   |
| ESR1                           | NPPA                                                                            | ESR1,NPPA                                               | 773                   |

|      |          |                                                     |     |
|------|----------|-----------------------------------------------------|-----|
| ESR1 | PARP4    | ESR1,MVP,PARP4                                      | 773 |
| ESR1 | PDGFRB   | ESR1,KIT,PDGFRB                                     | 773 |
| ESR1 | PPP2R3A  | ESR1,PPP2R3A                                        | 773 |
| ESR1 | PTPN11   | ESR1,PTPN11                                         | 773 |
| ESR1 | RAG2     | ESR1,RAG2                                           | 773 |
| ESR1 | RARA     | ESR1,RARA                                           | 773 |
| ESR1 | RBBP8    | ESR1,RBBP8                                          | 773 |
| ESR1 | ROS1     | ESR1,ROS1                                           | 773 |
| ESR1 | SDC1     | ESR1,NCAM1,SDC1                                     | 773 |
| ESR1 | TCF15    | ESR1,EZH2,TCF15                                     | 773 |
| ESR1 | VIM      | AKT1,CTNNB1,ESR1,VIM                                | 773 |
| ESR1 | XIAP     | CTNNB1,ESR1,XIAP                                    | 773 |
| ESR1 | XPO1     | ESR1,XPO1                                           | 773 |
| FAF1 | AKT1     | AKT1,FAF1                                           | 773 |
| FAF1 | CASP8    | CASP8,CDKN1A,FAF1,GAPDH,HSPA5                       | 773 |
| FAF1 | CD40     | CD40,FAF1,HSPA4,HSPA8                               | 773 |
| FAF1 | CDKN1A   | AKT1,CDKN1A,FAF1,GAPDH,SET                          | 773 |
| FAF1 | CREBBP   | CREBBP,FAF1,RUNX1                                   | 773 |
| FAF1 | CTNNB1   | CASP8,CTNNB1,FAF1                                   | 773 |
| FAF1 | FAS      | FAF1,FAS                                            | 773 |
| FAF1 | GAPDH    | AKT1,CDKN1A,CREBBP,CTNNB1,FAF1,FAS,GAPDH,SET        | 773 |
| FAF1 | GFAP     | FAF1,GFAP                                           | 773 |
| FAF1 | HSP90AA1 | FAF1,HSP90AA1,RPL5                                  | 773 |
| FAF1 | HSPA4    | AKT1,CDKN1A,CREBBP,FAF1,FAS,HSP90AA1,HSPA4,SET      | 773 |
| FAF1 | HSPA4L   | FAF1,HSPA4L,HSPA5,HSPA8                             | 773 |
| FAF1 | HSPA5    | AKT1,CASP8,CDKN1A,CREBBP,FAF1,GAPDH,HSPA5,SET       | 773 |
| FAF1 | HSPA8    | AKT1,CDKN1A,FAF1,FAS,GAPDH,HSP90AA1,HSPA8,SET       | 773 |
| FAF1 | HSPD1    | AKT1,CDKN1A,CTNNB1,FAF1,FAS,GAPDH,HSPD1,NR4A1,SET   | 773 |
| FAF1 | LMOD1    | FAF1,HSP90AA1,LMOD1,NPM1                            | 773 |
| FAF1 | MRC2     | FAF1,HSPD1,MRC2                                     | 773 |
| FAF1 | NPM1     | CDKN1A,FAF1,NPM1,RPL5                               | 773 |
| FAF1 | NR3C2    | FAF1,HSP90AA1,NR3C2                                 | 773 |
| FAF1 | NR4A1    | AKT1,FAF1,NR4A1                                     | 773 |
| FAF1 | PARP1    | AKT1,CASP8,CDKN1A,FAF1,FAS,GAPDH,HSP90AA1,PARP1,SET | 773 |
| FAF1 | PHB2     | AKT1,CDKN1A,CREBBP,FAF1,FAS,HSP90AA1,PHB2           | 773 |
| FAF1 | POU2F2   | FAF1,GAPDH,POU2F2                                   | 773 |

|      |         |                                                           |     |
|------|---------|-----------------------------------------------------------|-----|
| FAF1 | PTHLH   | CDKN1A,FAF1,PTHLH                                         | 773 |
| FAF1 | RPL19   | FAF1,RPL19,RPL5                                           | 773 |
| FAF1 | RPL5    | AKT1,CASP8,CDKN1A,CTNNB1,FAF1,FAS,GAPDH,HSP90AA1,RPL5,SET | 773 |
| FAF1 | RUNX1   | FAF1,RUNX1                                                | 773 |
| FAF1 | SET     | FAF1,GAPDH,SET                                            | 773 |
| FAF1 | SETBP1  | CDKN1A,CTNNB1,FAF1,SET,SETBP1                             | 773 |
| FAF1 | SKP1    | FAF1,HSPD1,SKP1                                           | 773 |
| FAF1 | SLC22A2 | FAF1,SLC22A2                                              | 773 |
| FAF1 | ST13    | FAF1,ST13                                                 | 773 |
| FAF1 | TNFSF10 | CASP8,FAF1,TNFSF10                                        | 773 |
| FAF1 | XIAP    | CASP8,CTNNB1,FAF1,XIAP                                    | 773 |
| FYN  | ANPEP   | ANPEP,FYN                                                 | 773 |
| FYN  | BAD     | BAD,FYN,MAPK3,Src                                         | 773 |
| FYN  | BAX     | BAX,FYN,MAPK3,Src                                         | 773 |
| FYN  | BCR     | BCR,FYN,MAPK1,MAPK3,Src                                   | 773 |
| FYN  | BRAF    | BRAF,FYN,MAPK3,Src                                        | 773 |
| FYN  | BTK     | BTK,FYN,PML,RAF1                                          | 773 |
| FYN  | C5      | C5,FYN                                                    | 773 |
| FYN  | CD14    | CD14,FYN,PICALM                                           | 773 |
| FYN  | CD4     | CD4,CD79A,EPOR,FCGR3A,FYN,IFNAR1,RASA1,Src                | 773 |
| FYN  | CD5     | CD4,CD5,CD79A,FYN                                         | 773 |
| FYN  | CD72    | CD5,CD72,FYN                                              | 773 |
| FYN  | CD79A   | CD4,CD79A,FCGR3A,FYN,IFNAR1,RASA1,Src                     | 773 |
| FYN  | CR2     | CD79A,CR2,FYN                                             | 773 |
| FYN  | CSF2RB  | BCR,CSF2RB,EPOR,FYN                                       | 773 |
| FYN  | DNM2    | DNM2,FYN,MKI67                                            | 773 |
| FYN  | DOK1    | DOK1,FYN,Src                                              | 773 |
| FYN  | EPOR    | CD4,CD79A,EPOR,FCGR3A,FYN,RASA1,Src                       | 773 |
| FYN  | FCGR3A  | CD79A,EPOR,FCGR3A,FYN,RASA1,Src                           | 773 |
| FYN  | FGFR2   | FGFR2,FYN                                                 | 773 |
| FYN  | FLT1    | FLT1,FYN                                                  | 773 |
| FYN  | GHR     | FYN,GHR,Src                                               | 773 |
| FYN  | GUCY2D  | FYN,GUCY2D                                                | 773 |
| FYN  | HBEGF   | CD4,FYN,HBEGF                                             | 773 |
| FYN  | IFNAR1  | CD4,CD79A,FCGR3A,FYN,IFNAR1,RASA1,Src                     | 773 |
| FYN  | IL2RB   | FYN,IL2RB                                                 | 773 |
| FYN  | IL7     | FYN,IL7,MS4A1                                             | 773 |
| FYN  | JAK3    | FYN,JAK3,PML,RAF1                                         | 773 |
| FYN  | MAP4K1  | BRAF,FYN,MAP4K1,RAF1                                      | 773 |

|      |         |                               |     |
|------|---------|-------------------------------|-----|
| FYN  | MAPK1   | BAX,FYN,MAPK1,MAPK3,SRC       | 773 |
| FYN  | MAPK3   | BAX,FYN,MAPK3,SRC             | 773 |
| FYN  | MAT1A   | FYN,MAT1A                     | 773 |
| FYN  | MKI67   | DNM2,FYN,MKI67                | 773 |
| FYN  | MS4A1   | FYN,MS4A1                     | 773 |
| FYN  | PICALM  | DNM2,FYN,PICALM               | 773 |
| FYN  | PKIA    | BAD,FYN,PKIA                  | 773 |
| FYN  | PML     | FYN,PML,RAF1                  | 773 |
| FYN  | POU2F2  | FYN,POU2F2                    | 773 |
| FYN  | PRDX2   | BAX,FYN,PRDX2                 | 773 |
| FYN  | RAF1    | BAX,FYN,MAPK3,RAF1,SRC        | 773 |
| FYN  | RAPGEF1 | FYN,RAPGEF1,SRC               | 773 |
| FYN  | RASA1   | FYN,RASA1                     | 773 |
| FYN  | RHOH    | CD4,FYN,RASA1,RHOH            | 773 |
| FYN  | SNCA    | BAX,FYN,MAPK3,SNCA,SRC        | 773 |
| FYN  | SOCS1   | FYN,SOCS1                     | 773 |
| FYN  | SRC     | BAX,FYN,MAPK3,SRC             | 773 |
| FYN  | TFRC    | FYN,TFRC                      | 773 |
| FYN  | VANGL1  | FYN,VANGL1                    | 773 |
| GRB2 | ABCB1   | ABCB1,GRB2                    | 773 |
| GRB2 | BCR     | BCR,GRB2                      | 773 |
| GRB2 | BLNK    | BLNK,GRB2,KIT,PDGFRB          | 773 |
| GRB2 | BTK     | BTK,GRB2,JAK1,PML             | 773 |
| GRB2 | CA2     | CA2,GRB2                      | 773 |
| GRB2 | CBL     | CBL,GRB2                      | 773 |
| GRB2 | CCR5    | CCR5,DNM2,GRB2,JAK2           | 773 |
| GRB2 | CD2     | CD2,FGFR2,GRB2,MKI67,PTPRC    | 773 |
| GRB2 | CD72    | BLNK,CD72,GRB2                | 773 |
| GRB2 | CD86    | CD86,GRB2,PTPRC               | 773 |
| GRB2 | CDKN1B  | CDKN1B,GRB2,JAK2,XPO1         | 773 |
| GRB2 | CR2     | CBL,CR2,GRB2                  | 773 |
| GRB2 | CSF3    | CSF3,GRB2,JAK1,JAK2           | 773 |
| GRB2 | DLX4    | DLX4,GRB2                     | 773 |
| GRB2 | DNM2    | DNM2,GRB2,MKI67               | 773 |
| GRB2 | DOK1    | DOK1,DOK2,GRB2                | 773 |
| GRB2 | DOK2    | DOK2,GRB2                     | 773 |
| GRB2 | EFHC1   | EFHC1,GRB2                    | 773 |
| GRB2 | EPO     | EPO,GRB2,JAK2,KIT,KITLG,PTPRC | 773 |
| GRB2 | FASLG   | FASLG,GRB2                    | 773 |
| GRB2 | FGFR2   | CBL,FGFR2,GRB2,PTK2B          | 773 |
| GRB2 | FLT1    | CBL,FLT1,GRB2                 | 773 |
| GRB2 | FLT3    | CBL,FLT3,GRB2                 | 773 |
| GRB2 | GC      | GC,GRB2,MKI67                 | 773 |

|       |         |                                      |     |
|-------|---------|--------------------------------------|-----|
| GRB2  | IL15    | GRB2,IL15,IL2RB,IL2RG,IL4R,IL9R,JAK2 | 773 |
| GRB2  | IL2RB   | GRB2,IL2RB,IL2RG,IL4R,IL9R,JAK1,JAK2 | 773 |
| GRB2  | IL2RG   | GRB2,IL2RB,IL2RG,IL4R,IL9R,JAK1      | 773 |
| GRB2  | IL4R    | GRB2,IL15,IL2RB,IL2RG,IL4R,IL9R,JAK2 | 773 |
| GRB2  | IL9R    | GRB2,IL15,IL2RB,IL2RG,IL4R,IL9R,JAK2 | 773 |
| GRB2  | ILK     | GRB2,ILK                             | 773 |
| GRB2  | ITGA4   | GRB2,ITGA4,MYH11                     | 773 |
| GRB2  | JAK1    | GRB2,JAK1,PML                        | 773 |
| GRB2  | JAK2    | CBL,CDKN1B,GRB2,JAK1,JAK2,PTPRC      | 773 |
| GRB2  | JAK3    | GRB2,JAK1,JAK3,PML                   | 773 |
| GRB2  | KIT     | GRB2,KIT,PDGFRB                      | 773 |
| GRB2  | KITLG   | EPO,FLT3,GRB2,KIT,KITLG              | 773 |
| GRB2  | MAP4K1  | GRB2,MAP4K1                          | 773 |
| GRB2  | MKI67   | DNM2,GRB2,MKI67                      | 773 |
| GRB2  | MUSK    | GRB2,MUSK                            | 773 |
| GRB2  | MYH11   | GRB2,ITGA4,MYH11                     | 773 |
| GRB2  | PDGFRB  | GRB2,KIT,PDGFRB,PTPRC                | 773 |
| GRB2  | PICALM  | DNM2,GRB2,PICALM                     | 773 |
| GRB2  | PML     | GRB2,JAK1,PML                        | 773 |
| GRB2  | PTK2B   | GRB2,PTK2B                           | 773 |
| GRB2  | PTPRC   | CBL,GRB2,PTPRC                       | 773 |
| GRB2  | RAPGEF1 | GRB2,RAPGEF1                         | 773 |
| GRB2  | SLC22A2 | GRB2,SLC22A2                         | 773 |
| GRB2  | SLC8A1  | GRB2,SLC8A1                          | 773 |
| GRB2  | SYNJ1   | GRB2,SYNJ1                           | 773 |
| GRB2  | TFRC    | GRB2,ITGA4,TFRC                      | 773 |
| GRB2  | WNK2    | GRB2,WNK2                            | 773 |
| GRB2  | XPO1    | GRB2,XPO1                            | 773 |
| HDAC1 | AFF1    | AFF1,HDAC1                           | 773 |
| HDAC1 | BCL11B  | BCL11B,HDAC1                         | 773 |
| HDAC1 | BCL3    | BCL3,HDAC1                           | 773 |
| HDAC1 | CEBPB   | CEBPB,GATA3,HDAC1,IRF4,SPI1          | 773 |
| HDAC1 | CHFR    | CHFR,HDAC1                           | 773 |
| HDAC1 | CTCF    | CTCF,HDAC1                           | 773 |
| HDAC1 | DNMT1   | DNMT1,DNMT3A,HDAC1,SPI1              | 773 |
| HDAC1 | DNMT3A  | CEBPB,DNMT3A,GATA3,HDAC1,IRF4,SPI1   | 773 |
| HDAC1 | E2F1    | CEBPB,E2F1,HDAC1,TP73                | 773 |
| HDAC1 | FOXP3   | FOXP3,HDAC1                          | 773 |
| HDAC1 | GATA2   | GATA2,HDAC1,TAL1                     | 773 |
| HDAC1 | GATA3   | CEBPB,DNMT3A,GATA3,HDAC1,IRF4,SPI1   | 773 |
| HDAC1 | GGH     | GGH,HDAC1                            | 773 |
| HDAC1 | HDAC9   | CEBPB,HDAC1,HDAC9,ZBTB16             | 773 |
| HDAC1 | HOXA9   | HDAC1,HOXA9                          | 773 |

|       |         |                                         |     |
|-------|---------|-----------------------------------------|-----|
| HDAC1 | IRF4    | CEBPB, DNMT3A, GATA3, HDAC1, IRF4, SPI1 | 773 |
| HDAC1 | IRF8    | CEBPB, GATA3, HDAC1, IRF4, IRF8, SPI1   | 773 |
| HDAC1 | KLF4    | HDAC1, KLF4                             | 773 |
| HDAC1 | MMP9    | HDAC1, MMP9                             | 773 |
| HDAC1 | PIK3CA  | HDAC1, PIK3CA                           | 773 |
| HDAC1 | RUNX1T1 | HDAC1, RUNX1T1                          | 773 |
| HDAC1 | SAMSN1  | HDAC1, SAMSN1                           | 773 |
| HDAC1 | SPI1    | CEBPB, DNMT3A, HDAC1, SPI1              | 773 |
| HDAC1 | STAT5A  | CEBPB, HDAC1, STAT5A                    | 773 |
| HDAC1 | TAL1    | HDAC1, TAL1                             | 773 |
| HDAC1 | TBL1XR1 | HDAC1, TBL1XR1                          | 773 |
| HDAC1 | TOP2A   | CTCF, HDAC1, TOP2A, TOP2B               | 773 |
| HDAC1 | TOP2B   | HDAC1, TOP2B                            | 773 |
| HDAC1 | TP73    | CEBPB, E2F1, HDAC1, TP73                | 773 |
| HDAC1 | WTAP    | HDAC1, WTAP                             | 773 |
| HDAC1 | XPB1    | HDAC1, XPB1                             | 773 |
| HDAC1 | ZBTB16  | HDAC1, HDAC9, ZBTB16                    | 773 |
| HDAC1 | ZMYM2   | CTCF, HDAC1, ZMYM2                      | 773 |
| LYN   | ANGPT2  | ANGPT2, LYN                             | 773 |
| LYN   | CASP2   | CASP2, LYN                              | 773 |
| LYN   | CASP9   | CASP9, LYN                              | 773 |
| LYN   | CBL     | CBL, CRKL, LYN                          | 773 |
| LYN   | CD36    | CD36, LYN                               | 773 |
| LYN   | CD72    | CD72, LYN                               | 773 |
| LYN   | CDK1    | CDK1, LYN                               | 773 |
| LYN   | CRKL    | CBL, CRKL, DOK1, INPP5D, LYN            | 773 |
| LYN   | CSF2RB  | CSF2RB, JAK2, LYN                       | 773 |
| LYN   | CSF3    | CSF3, JAK2, LYN                         | 773 |
| LYN   | CTLA4   | CTLA4, LYN, XPO1                        | 773 |
| LYN   | DOK1    | CRKL, DOK1, DOK2, INPP5D, LYN           | 773 |
| LYN   | DOK2    | CRKL, DOK2, INPP5D, LYN                 | 773 |
| LYN   | FASLG   | FASLG, LYN                              | 773 |
| LYN   | FGFR2   | CBL, FGFR2, LYN, PTK2B                  | 773 |
| LYN   | FGR     | FGR, LYN                                | 773 |
| LYN   | FLT3    | CBL, CRKL, FLT3, LYN                    | 773 |
| LYN   | GP1BA   | GP1BA, LYN                              | 773 |
| LYN   | IL1B    | IL1B, LYN                               | 773 |
| LYN   | IL5RA   | CSF2RB, IL5RA, LYN                      | 773 |
| LYN   | IL6ST   | IL6ST, JAK2, LYN                        | 773 |
| LYN   | IL7     | CBL, IL7, LYN                           | 773 |
| LYN   | INPP5D  | CRKL, INPP5D, LYN                       | 773 |
| LYN   | ITGAX   | ITGAX, ITGB2, LYN, PTK2B                | 773 |
| LYN   | ITGB2   | ITGAX, ITGB2, LYN                       | 773 |

|      |          |                         |     |
|------|----------|-------------------------|-----|
| LYN  | JAK2     | CBL,JAK2,LYN            | 773 |
| LYN  | MME      | LYN,MME                 | 773 |
| LYN  | POU2F2   | LYN,POU2F2              | 773 |
| LYN  | PTK2B    | LYN,PTK2B               | 773 |
| LYN  | XPO1     | CRKL,LYN,XPO1           | 773 |
| RELA | AFF1     | AFF1,RELA               | 773 |
| RELA | BCL3     | BCL3,RELA               | 773 |
| RELA | CASP8    | CASP8,GAPDH,HSPA5,RELA  | 773 |
| RELA | CCND2    | CCND2,PIK3CA,RELA       | 773 |
| RELA | CDX2     | CDX2,RELA               | 773 |
| RELA | CHFR     | CHFR,PARP1,RELA         | 773 |
| RELA | CXCR3    | CXCR3,RELA              | 773 |
| RELA | CXCR4    | CXCR4,HSPA8,RELA        | 773 |
| RELA | CYP24A1  | CYP24A1,RELA            | 773 |
| RELA | EGF      | EGF,NR4A1,RELA          | 773 |
| RELA | ELF4     | ELF4,HSPA5,RELA,VDR     | 773 |
| RELA | FOXP3    | FOXP3,RELA              | 773 |
| RELA | GAPDH    | GAPDH,RELA              | 773 |
| RELA | HSPA5    | CASP8,GAPDH,HSPA5,RELA  | 773 |
| RELA | HSPA8    | GAPDH,HSPA8,RELA        | 773 |
| RELA | HSPD1    | GAPDH,HSPD1,NR4A1,RELA  | 773 |
| RELA | IL6      | IL6,RELA                | 773 |
| RELA | IRF8     | IRF8,RELA               | 773 |
| RELA | KDM6A    | KDM6A,RELA,RXRA         | 773 |
| RELA | KDR      | KDR,RELA                | 773 |
| RELA | KLF4     | KDM6A,KLF4,RELA         | 773 |
| RELA | LIFR     | LIFR,RELA,RXRA          | 773 |
| RELA | LYL1     | LYL1,RELA               | 773 |
| RELA | MAP4K1   | MAP4K1,RELA             | 773 |
| RELA | NFKBIB   | NFKBIB,RELA             | 773 |
| RELA | NR4A1    | NR4A1,RELA              | 773 |
| RELA | NSD1     | AFF1,NSD1,RELA          | 773 |
| RELA | PARP1    | CASP8,GAPDH,PARP1,RELA  | 773 |
| RELA | PBX1     | PARP1,PBX1,RELA,RXRA    | 773 |
| RELA | PGR      | PARP1,PGR,RELA,STAT5A   | 773 |
| RELA | PIK3CA   | PIK3CA,RELA             | 773 |
| RELA | PPARGC1A | PPARGC1A,RELA,STAT6,VDR | 773 |
| RELA | RPL5     | CASP8,GAPDH,RELA,RPL5   | 773 |
| RELA | RXRA     | PARP1,PBX1,RELA,RXRA    | 773 |
| RELA | STAT5A   | RELA,STAT5A             | 773 |
| RELA | STAT6    | RELA,STAT6              | 773 |
| RELA | TERT     | CCND2,RELA,TERT         | 773 |
| RELA | TF       | HSPD1,RELA,TF           | 773 |



|      |         |                                                |     |
|------|---------|------------------------------------------------|-----|
| RELA | TP73    | RELA,RPL5,TP73                                 | 773 |
| RELA | VDR     | RELA,STAT6,VDR                                 | 773 |
| RELA | WTAP    | RELA,WTAP                                      | 773 |
| SHC1 | AMD1    | AMD1,SHC1                                      | 773 |
| SHC1 | BLNK    | BLNK,CRKL,KIT,PDGFRB,SHC1                      | 773 |
| SHC1 | CD2     | CD2,FGFR2,SHC1                                 | 773 |
| SHC1 | CD38    | CD38,SHC1                                      | 773 |
| SHC1 | CLPB    | CLPB,CRKL,PTPN11,SHC1                          | 773 |
| SHC1 | CRKL    | CRKL,SHC1                                      | 773 |
| SHC1 | CSF1R   | CSF1R,SHC1,TEK                                 | 773 |
| SHC1 | CSF2RB  | CSF2RB,JAK2,KIT,SHC1                           | 773 |
| SHC1 | FCGR3A  | CD2,FCGR3A,PDGFRB,SHC1                         | 773 |
| SHC1 | FGFR2   | FGFR2,SHC1                                     | 773 |
| SHC1 | FLT1    | CRKL,FLT1,SHC1                                 | 773 |
| SHC1 | FLT3    | CRKL,FLT3,SHC1                                 | 773 |
| SHC1 | ICAM1   | ICAM1,IL15,IL2RB,IL2RG,IL4,IL9R,SHC1           | 773 |
| SHC1 | IL15    | ICAM1,IL15,IL2RB,IL2RG,IL4,IL4R,IL9R,JAK2,SHC1 | 773 |
| SHC1 | IL2     | ICAM1,IL2,IL2RG,IL4,IL9R,SHC1                  | 773 |
| SHC1 | IL2RB   | ICAM1,IL2RB,IL2RG,IL4,IL4R,IL9R,JAK2,SHC1      | 773 |
| SHC1 | IL2RG   | ICAM1,IL2RB,IL2RG,IL4,IL4R,IL9R,SHC1           | 773 |
| SHC1 | IL4     | ICAM1,IL2RB,IL2RG,IL4,IL9R,SHC1                | 773 |
| SHC1 | IL4R    | ICAM1,IL15,IL2RB,IL2RG,IL4,IL4R,IL9R,JAK2,SHC1 | 773 |
| SHC1 | IL5RA   | CSF2RB,ICAM1,IL5RA,ILK,SHC1                    | 773 |
| SHC1 | IL9R    | ICAM1,IL15,IL2RB,IL2RG,IL4,IL4R,IL9R,JAK2,SHC1 | 773 |
| SHC1 | ILK     | ILK,SHC1                                       | 773 |
| SHC1 | JAK2    | JAK2,SHC1                                      | 773 |
| SHC1 | KIT     | KIT,PDGFRB,SHC1                                | 773 |
| SHC1 | KITLG   | AMD1,CRKL,FLT3,KIT,KITLG,SHC1                  | 773 |
| SHC1 | LIFR    | LIFR,SHC1                                      | 773 |
| SHC1 | LRP1    | LRP1,SHC1                                      | 773 |
| SHC1 | MAT1A   | MAT1A,SHC1                                     | 773 |
| SHC1 | MPL     | JAK2,MPL,SHC1                                  | 773 |
| SHC1 | PDGFRB  | CRKL,KIT,PDGFRB,SHC1                           | 773 |
| SHC1 | PRDX2   | PRDX2,SHC1                                     | 773 |
| SHC1 | PTPN11  | CRKL,PTPN11,SHC1                               | 773 |
| SHC1 | RAPGEF1 | CRKL,RAPGEF1,SHC1                              | 773 |
| SHC1 | RB1     | RB1,SHC1                                       | 773 |
| SHC1 | STAT5A  | CRKL,PTPN11,SHC1,STAT5A                        | 773 |
| SHC1 | TEK     | PDGFRB,SHC1,TEK                                | 773 |

|       |        |                                             |     |
|-------|--------|---------------------------------------------|-----|
| STAT1 | AKT1   | AKT1,NFKBIA,STAT1                           | 773 |
| STAT1 | ATM    | ATM,STAT1                                   | 773 |
| STAT1 | BCL3   | BCL3,FOS,STAT1                              | 773 |
| STAT1 | BTG1   | BTG1,STAT1                                  | 773 |
| STAT1 | BTK    | BTK,JAK1,PML,STAT1,STAT3                    | 773 |
| STAT1 | CASP3  | CASP3,NFKBIA,STAT1                          | 773 |
| STAT1 | CCR1   | CCR1,STAT1,STAT3                            | 773 |
| STAT1 | CCR5   | CCR5,CXCR4,JAK2,LCK,STAT1,STAT3             | 773 |
| STAT1 | CD40   | CD40,IL4R,STAT1                             | 773 |
| STAT1 | CSF2RB | AKT1,CSF2RB,JAK2,STAT1,STAT3                | 773 |
| STAT1 | CXCR3  | CXCR3,STAT1,STAT3                           | 773 |
| STAT1 | CXCR4  | CXCR4,STAT1,STAT3                           | 773 |
| STAT1 | EGF    | EGF,STAT1,STAT3                             | 773 |
| STAT1 | FLT1   | FLT1,STAT1,STAT3                            | 773 |
| STAT1 | FOS    | FOS,STAT1,STAT3                             | 773 |
| STAT1 | FOXP3  | FOXP3,STAT1,STAT3                           | 773 |
| STAT1 | HSPA4L | HSPA4L,STAT1                                | 773 |
| STAT1 | IFNA1  | IFNA1,IFNA2,IFNAR2,ISG15,STAT1              | 773 |
| STAT1 | IFNA2  | IFNA1,IFNA2,IFNAR2,ISG15,STAT1              | 773 |
| STAT1 | IFNAR2 | IFNA1,IFNA2,IFNAR2,ISG15,STAT1              | 773 |
| STAT1 | IFNG   | FOS,IFNG,JAK1,JAK2,PTPN11,STAT1             | 773 |
| STAT1 | IL15   | IL15,IL2RB,IL2RG,IL4R,IL9R,JAK2,STAT1       | 773 |
| STAT1 | IL1B   | AKT1,IL1B,PDGFRB,STAT1                      | 773 |
| STAT1 | IL2RA  | IL2RA,IL2RB,STAT1,STAT3,TBX21               | 773 |
| STAT1 | IL2RB  | IL2RB,IL2RG,IL4R,IL9R,JAK1,JAK2,STAT1,STAT3 | 773 |
| STAT1 | IL2RG  | IL2RB,IL2RG,IL4R,IL9R,JAK1,STAT1            | 773 |
| STAT1 | IL4R   | IL15,IL2RB,IL2RG,IL4R,IL9R,JAK2,STAT1       | 773 |
| STAT1 | IL9R   | IL15,IL2RB,IL2RG,IL4R,IL9R,JAK2,STAT1       | 773 |
| STAT1 | IRF8   | FOS,IRF8,STAT1                              | 773 |
| STAT1 | ISG15  | IFNA1,IFNA2,ISG15,STAT1                     | 773 |
| STAT1 | JAK1   | JAK1,PML,STAT1,STAT3                        | 773 |
| STAT1 | JAK2   | JAK1,JAK2,NFKBIA,STAT1,STAT3                | 773 |
| STAT1 | JAK3   | JAK1,JAK3,PML,STAT1,STAT3                   | 773 |
| STAT1 | KITLG  | KITLG,STAT1                                 | 773 |
| STAT1 | LCK    | LCK,NFKBIA,STAT1,STAT3                      | 773 |
| STAT1 | LIF    | FOS,LIF,STAT1,STAT3                         | 773 |
| STAT1 | NFKBIA | CASP3,NFKBIA,STAT1                          | 773 |
| STAT1 | NOS2   | NOS2,STAT1                                  | 773 |
| STAT1 | PDGFRB | PDGFRB,STAT1,STAT3                          | 773 |
| STAT1 | PIK3CA | PIK3CA,PTPN11,STAT1                         | 773 |
| STAT1 | PML    | JAK1,PML,STAT1,STAT3                        | 773 |
| STAT1 | PPARG  | PPARG,PSMC3,STAT1                           | 773 |

|       |         |                                   |     |
|-------|---------|-----------------------------------|-----|
| STAT1 | PSMC3   | PSMC3,STAT1                       | 773 |
| STAT1 | PTPN11  | JAK1,PTPN11,STAT1                 | 773 |
| STAT1 | STAT3   | JAK1,STAT1,STAT3                  | 773 |
| STAT1 | STAT5A  | PTPN11,STAT1,STAT3,STAT5A         | 773 |
| STAT1 | TBX21   | IL2RA,IL2RB,STAT1,STAT3,TBX21     | 773 |
| STAT1 | VDR     | NFKBIA,STAT1,VDR                  | 773 |
| TRAF6 | AKT1    | AKT1,TRAF6                        | 773 |
| TRAF6 | BIRC2   | BIRC2,CASP8,TRAF6                 | 773 |
| TRAF6 | BIRC3   | BIRC3,EED,JUN,RAD21,TRAF6         | 773 |
| TRAF6 | BLNK    | BLNK,KIT,PDGFRB,TRAF6             | 773 |
| TRAF6 | CARD11  | AKT1,BIRC2,CARD11,TNFRSF1A,TRAF6  | 773 |
| TRAF6 | CASP8   | CASP8,TRAF6                       | 773 |
| TRAF6 | CCR5    | CCR5,JAK2,STAT3,TRAF6             | 773 |
| TRAF6 | CD40    | BIRC2,CD40,TRAF6                  | 773 |
| TRAF6 | CD44    | CD44,STAT3,TRAF6                  | 773 |
| TRAF6 | CD72    | BLNK,CD72,STAT3,TRAF6             | 773 |
| TRAF6 | CNR2    | CCR5,CNR2,TRAF6                   | 773 |
| TRAF6 | CSF2RB  | AKT1,CSF2RB,JAK2,KIT,STAT3,TRAF6  | 773 |
| TRAF6 | CYP24A1 | CYP24A1,TRAF6                     | 773 |
| TRAF6 | EED     | EED,JUN,RAD21,TRAF6               | 773 |
| TRAF6 | EGR1    | EGR1,STAT3,TRAF6                  | 773 |
| TRAF6 | HMBS    | HMBS,JUN,TRAF6                    | 773 |
| TRAF6 | HSPB1   | HSPB1,JUN,TNFRSF1A,TRAF6          | 773 |
| TRAF6 | IL18R1  | IL18R1,STAT3,TRAF6                | 773 |
| TRAF6 | IL1B    | AKT1,IL1B,IRAK1,PDGFRB,TRAF6      | 773 |
| TRAF6 | IL2     | IL2,TRAF6                         | 773 |
| TRAF6 | IL6ST   | CD40,IL6ST,JAK2,STAT3,TRAF6       | 773 |
| TRAF6 | IRAK1   | IRAK1,MYD88,TRAF6                 | 773 |
| TRAF6 | IRF8    | IRF8,JUN,TRAF6                    | 773 |
| TRAF6 | JAK2    | JAK2,STAT3,TRAF6                  | 773 |
| TRAF6 | JUN     | HSPB1,JUN,TNFRSF1A,TRAF6          | 773 |
| TRAF6 | KIT     | KIT,PDGFRB,TRAF6                  | 773 |
| TRAF6 | LTA     | BIRC2,LTA,TNFRSF1A,TNFRSF1B,TRAF6 | 773 |
| TRAF6 | MAP2K1  | EED,JUN,MAP2K1,RAD21,TRAF6        | 773 |
| TRAF6 | MAT1A   | MAT1A,MAT2A,TRAF6                 | 773 |
| TRAF6 | MAT2A   | MAT2A,TRAF6                       | 773 |
| TRAF6 | MBP     | MBP,TRAF6                         | 773 |
| TRAF6 | MVP     | MVP,TRAF6                         | 773 |
| TRAF6 | MYD88   | IRAK1,MYD88,TRAF6                 | 773 |
| TRAF6 | NF1     | AKT1,NF1,TRAF6                    | 773 |
| TRAF6 | PARP4   | MVP,PARP4,TRAF6                   | 773 |
| TRAF6 | PDGFRB  | KIT,PDGFRB,STAT3,TRAF6            | 773 |
| TRAF6 | PIK3CA  | PIK3CA,PTPN11,TRAF6               | 773 |

|       |          |                                    |     |
|-------|----------|------------------------------------|-----|
| TRAF6 | PRDX2    | HSPB1,PRDX2,TRAF6                  | 773 |
| TRAF6 | PTPN11   | PTPN11,TRAF6                       | 773 |
| TRAF6 | RAD21    | JUN,RAD21,TRAF6                    | 773 |
| TRAF6 | SET      | JUN,SET,TRAF6                      | 773 |
| TRAF6 | SIGLEC5  | CASP8,SIGLEC5,TRAF6                | 773 |
| TRAF6 | ST13     | IRAK1,JUN,ST13,TRAF6               | 773 |
| TRAF6 | STAT3    | STAT3,TRAF6                        | 773 |
| TRAF6 | TFRC     | TFRC,TRAF6                         | 773 |
| TRAF6 | TNFRSF1A | HSPB1,JUN,TNFRSF1A,TRAF6           | 773 |
| TRAF6 | TNFRSF1B | BIRC2,CD40,TNFRSF1A,TNFRSF1B,TRAF6 | 773 |
| TRAF6 | WBPI1L   | TNFRSF1A,TRAF6,WBPI1L              | 773 |

## Supplementary Table 6. Patient-specific candidate AML genes

### Sample 018

| Sample-specific Candidate genes | AML | Number of specific interactions | In which module of known AML gene |
|---------------------------------|-----|---------------------------------|-----------------------------------|
| PPA2                            |     | 1                               | pos_gene,GPX4                     |
| WLS                             |     | 3                               | pos_gene,C5,KMT2C,SLC35B2         |
| UBR2                            |     | 0                               | pos_gene:None                     |
| WNK1                            |     | 1                               | pos_gene,WNK2                     |
| CSTF3                           |     | 0                               | pos_gene:None                     |
| LRIG1                           |     | 0                               | pos_gene:None                     |
| ADCY1                           |     | 2                               | pos_gene,F2RL1,GNAS               |
| NETO2                           |     | 2                               | pos_gene,EGF,LSR                  |
| SLC39A8                         |     | 2                               | pos_gene,PTCH1,SLC35B2            |
| GET4                            |     | 0                               | pos_gene:None                     |
| TAF7                            |     | 0                               | pos_gene:None                     |
| ENC1                            |     | 0                               | pos_gene:None                     |
| ZDHHC9                          |     | 2                               | pos_gene,HBEGF,IFNA2              |
| LIPH                            |     | 0                               | pos_gene:None                     |
| NDUFA3                          |     | 5                               | pos_gene,CD72,EGF,LSR,NRAS,SLC3A1 |
| RANBP3                          |     | 0                               | pos_gene:None                     |
| NR5A1                           |     | 0                               | pos_gene:None                     |
| RASSF1                          |     | 0                               | pos_gene:None                     |
| PPP1R15A                        |     | 2                               | pos_gene,BAX,BRAF                 |
| BRD2                            |     | 0                               | pos_gene:None                     |
| NOP2                            |     | 0                               | pos_gene:None                     |
| BABAM1                          |     | 0                               | pos_gene:None                     |
| MAS1                            |     | 0                               | pos_gene:None                     |
| FBXL7                           |     | 7                               | pos_gene,BIRC5,SKP1               |
| EHD4                            |     | 0                               | pos_gene:None                     |
| NCAPG2                          |     | 0                               | pos_gene:None                     |
| SLC16A2                         |     | 1                               | pos_gene,CD53                     |
| ATP1B3                          |     | 0                               | pos_gene:None                     |
| SEC22A                          |     | 1                               | pos_gene,CNR1                     |
| ABLIM2                          |     | 0                               | pos_gene:None                     |
| CAMSAP3                         |     | 0                               | pos_gene:None                     |
| PPP5C                           |     | 1                               | pos_gene,AHCY                     |
| DLX5                            |     | 0                               | pos_gene:None                     |
| SLC25A19                        |     | 0                               | pos_gene:None                     |
| EHBP1                           |     | 0                               | pos_gene:None                     |
| ERAP1                           |     | 1                               | pos_gene,IL6                      |
| HOXD13                          |     | 1                               | pos_gene,TLX3                     |

|           |    |                                        |
|-----------|----|----------------------------------------|
| IL17RD    | 0  | pos_gene:None                          |
| COG5      | 39 | pos_gene,CD274,IL23A,STX4              |
| SCN1B     | 1  | pos_gene,CXCR1                         |
| SYNM      | 0  | pos_gene:None                          |
| LYST      | 1  | pos_gene,NPM1                          |
| ITGA6     | 39 | pos_gene,ANPEP,CD36,CD9,SLC22A2        |
| RGS16     | 0  | pos_gene:None                          |
| PDZD2     | 1  | pos_gene,RAD21                         |
| RPS6KA1   | 4  | pos_gene,BCL2L11,CAV1,NR4A1,TCF15      |
| PAX3      | 1  | pos_gene,HDAC9                         |
| COLGALT2  | 0  | pos_gene:None                          |
| RALA      | 2  | pos_gene,MYO1G,PTK2B                   |
| THEM4     | 19 | pos_gene,FPGS                          |
| UBQLN2    | 4  | pos_gene,CEACAM5,CEACAM8,F3            |
| RGS10     | 0  | pos_gene:None                          |
| JAKMIP2   | 0  | pos_gene:None                          |
| MAP4K4    | 0  | pos_gene:None                          |
| COL20A1   | 2  | pos_gene,IL12A,MMP9                    |
| HSPH1     | 0  | pos_gene:None                          |
| MYH7B     | 0  | pos_gene:None                          |
| PEX19     | 1  | pos_gene,MUC1                          |
| MAP7      | 0  | pos_gene:None                          |
| CROCC     | 0  | pos_gene:None                          |
| STXBP2    | 0  | pos_gene:None                          |
| RGS5      | 0  | pos_gene:None                          |
| CUL4A     | 4  | pos_gene,NFKB2,NFKBIA,SIGLEC9,SOCS1    |
| GJB7      | 1  | pos_gene,SDC1                          |
| RNF8      | 0  | pos_gene:None                          |
| KCNQ4     | 0  | pos_gene:None                          |
| SEMA3A    | 0  | pos_gene:None                          |
| GABARAPL1 | 0  | pos_gene:None                          |
| PCDHGC3   | 0  | pos_gene:None                          |
| CC2D2A    | 0  | pos_gene:None                          |
| PCK2      | 1  | pos_gene,RASGRP3                       |
| RECQL4    | 0  | pos_gene:None                          |
| COMMD1    | 62 | pos_gene,CBFB,NFKB2,NFKBIA,RAD21,SOCS1 |
| KALRN     | 0  | pos_gene:None                          |
| PPFIA1    | 0  | pos_gene:None                          |
| DRD3      | 0  | pos_gene:None                          |
| NDUFAF2   | 0  | pos_gene:None                          |
| CLEC11A   | 1  | pos_gene,AMD1                          |
| CAMLG     | 0  | pos_gene:None                          |
| KPNA1     | 3  | pos_gene,FHIT,MYB,TERT                 |

|         |    |                                                    |
|---------|----|----------------------------------------------------|
| TPR     | 2  | pos_gene,BIRC2,RAD21                               |
| DNAJB6  | 1  | pos_gene,WNK2                                      |
| GSS     | 2  | pos_gene,DNM2,SAMSN1                               |
| RPN2    | 2  | pos_gene,IL2,SET                                   |
| AHCYL1  | 1  | pos_gene,TKT                                       |
| SUSD4   | 1  | pos_gene,MAGED2                                    |
| TRAK2   | 0  | pos_gene:None                                      |
| TP53BP2 | 3  | pos_gene,BCL2,HDAC9,SAMSN1                         |
| ABCC4   | 2  | pos_gene,DHRS9,NOS3                                |
| S1PR2   | 0  | pos_gene:None                                      |
| NCS1    | 0  | pos_gene:None                                      |
| IL17RC  | 4  | pos_gene,ABCG2,IL2,IL4R,USP18                      |
| RARG    | 1  | pos_gene,CEACAM8                                   |
| PTPRH   | 0  | pos_gene:None                                      |
| MXI1    | 0  | pos_gene:None                                      |
| MUC4    | 1  | pos_gene,DHRS9                                     |
| NAP1L4  | 0  | pos_gene:None                                      |
| CDH6    | 0  | pos_gene:None                                      |
| RGS1    | 0  | pos_gene:None                                      |
| STIM2   | 0  | pos_gene:None                                      |
| CRBN    | 2  | pos_gene,EWSR1,SALL4                               |
| SWAP70  | 0  | pos_gene:None                                      |
| ANKS1A  | 0  | pos_gene:None                                      |
| ELOVL5  | 3  | pos_gene,CD33,CEACAM3,PREP                         |
| DNM1L   | 2  | pos_gene,AFF1,DCK                                  |
| TMEM192 | 2  | pos_gene,EPM2A,USP18                               |
| PDP1    | 0  | pos_gene:None                                      |
| GPR161  | 1  | pos_gene,CD53                                      |
| CDH10   | 0  | pos_gene:None                                      |
| AIFM1   | 1  | pos_gene,CPOX                                      |
| SPTLC1  | 0  | pos_gene:None                                      |
| CCHCR1  | 0  | pos_gene:None                                      |
| UMPS    | 2  | pos_gene,DNM2,HMBS                                 |
| TTC3    | 0  | pos_gene:None                                      |
| NQO2    | 0  | pos_gene:None                                      |
| NCF2    | 21 | pos_gene,CYBB                                      |
| GNAT3   | 3  | pos_gene,CXCR4,DIO3,PGR                            |
| RNF123  | 5  | pos_gene,CDK5,CXCR2,MAPK1,PARP4,TLR4               |
| ST7     | 15 | pos_gene,ANPEP,ITGA5,PLEKHM1,PREB,PREP,THY1,VANGL1 |
| G6PD    | 1  | pos_gene,AFF1                                      |
| LGALS8  | 0  | pos_gene:None                                      |
| MYH6    | 0  | pos_gene:None                                      |
| RPL7    | 1  | pos_gene,NFKBIB                                    |

|          |    |                                   |
|----------|----|-----------------------------------|
| AIM2     | 5  | pos_gene,BCL11B,CD6,CTCF,POT1,WT1 |
| PRMT2    | 0  | pos_gene:None                     |
| SLC7A5   | 2  | pos_gene,PSMC3,RB1                |
| GBP2     | 0  | pos_gene:None                     |
| JPH1     | 1  | pos_gene,IL9R                     |
| PLS3     | 0  | pos_gene:None                     |
| SNRNPB   | 2  | pos_gene,ERBB4,PTEN               |
| CREB3    | 3  | pos_gene,JUNB,LRSAM1,MS4A1        |
| GPA1     | 0  | pos_gene:None                     |
| PLEKHF2  | 2  | pos_gene,ERBB4,PTEN               |
| TRAK1    | 0  | pos_gene:None                     |
| MTF2     | 1  | pos_gene,EED                      |
| TAP2     | 0  | pos_gene:None                     |
| DHCR24   | 0  | pos_gene:None                     |
| TTBK1    | 3  | pos_gene,CTNBN1,ERBB4,PTEN        |
| DPYSL3   | 0  | pos_gene:None                     |
| IARS2    | 0  | pos_gene:None                     |
| MAPKAPK3 | 0  | pos_gene:None                     |
| S1PR1    | 2  | pos_gene,CD69                     |
| EPB42    | 1  | pos_gene,SLC8A1                   |
| AFF3     | 4  | pos_gene,MLLT3                    |
| ARHGEF11 | 0  | pos_gene:None                     |
| OSMR     | 3  | pos_gene,IL6ST,LIF,LIFR           |
| ZFP36    | 2  | pos_gene,RUNX1,TERT               |
| NUP205   | 1  | pos_gene,NR3C1                    |
| NEK9     | 0  | pos_gene:None                     |
| EXOC5    | 1  | pos_gene,PTK2B                    |
| HSPA9    | 0  | pos_gene:None                     |
| SERBP1   | 0  | pos_gene:None                     |
| EBF1     | 11 | pos_gene,PAX5                     |
| CDK7     | 0  | pos_gene:None                     |
| CCSAP    | 0  | pos_gene:None                     |
| PTGES3   | 4  | pos_gene,DAXX,DNMT1,NR3C2,SPI1    |
| NAGPA    | 1  | pos_gene,CD4                      |
| STT3B    | 1  | pos_gene,COX10                    |
| B3GAT3   | 0  | pos_gene:None                     |
| TMEM33   | 0  | pos_gene:None                     |
| PCDHGB4  | 0  | pos_gene:None                     |
| NR5A2    | 1  | pos_gene,NSD1                     |
| CLCN3    | 0  | pos_gene:None                     |
| PCBD1    | 0  | pos_gene:None                     |
| SLC2A12  | 0  | pos_gene:None                     |
| DGKZ     | 0  | pos_gene:None                     |



|           |   |                                   |
|-----------|---|-----------------------------------|
| GLUL      | 1 | pos_gene,NFKBIB                   |
| CLCA1     | 3 | pos_gene,CSPG4,LGALS4,MYO1G       |
| DEK       | 0 | pos_gene:None                     |
| NEK2      | 1 | pos_gene,BIRC2                    |
| MILR1     | 3 | pos_gene,CD83,FAT3,IL2RG          |
| SRP14     | 0 | pos_gene:None                     |
| KIDINS220 | 1 | pos_gene,FAT4                     |
| WDR6      | 1 | pos_gene,KDR                      |
| ERLIN1    | 0 | pos_gene:None                     |
| TK1       | 1 | pos_gene,SLC22A2                  |
| HNRNPR    | 2 | pos_gene,BCL11B,CHEK2             |
| CDA       | 1 | pos_gene,DNM2                     |
| RAB3C     | 0 | pos_gene:None                     |
| ZFPL1     | 1 | pos_gene,VAMP1                    |
| SYT6      | 0 | pos_gene:None                     |
| ATP2B1    | 1 | pos_gene,NR3C1                    |
| COPB2     | 2 | pos_gene,PPA1,RASGRP3             |
| P4HA1     | 1 | pos_gene,CLPB                     |
| RGS3      | 0 | pos_gene:None                     |
| DNAJC10   | 4 | pos_gene,ANXA5,AZGP1,HSPA4L,LRP1B |
| COPG2     | 0 | pos_gene:None                     |
| SLC25A24  | 1 | pos_gene,CD74                     |
| TRIM23    | 2 | pos_gene,CASP9,CRKL               |
| STK38     | 0 | pos_gene:None                     |
| PCDHA10   | 1 | pos_gene,TCF15                    |
| DOCK4     | 1 | pos_gene,NPM1                     |
| NUP54     | 1 | pos_gene,NME1                     |
| SRSF11    | 0 | pos_gene:None                     |
| UROD      | 0 | pos_gene:None                     |
| HCRTR1    | 1 | pos_gene,CNR2                     |
| BCHE      | 2 | pos_gene,FN1,MUSK                 |
| ATP2A3    | 0 | pos_gene:None                     |
| WDR26     | 2 | pos_gene,GH1,LMOD1                |
| COPA      | 3 | pos_gene,CD59,HLA-G,PTPRC         |
| UBAC1     | 0 | pos_gene:None                     |
| ARF5      | 1 | pos_gene,AFF1                     |
| JKAMP     | 0 | pos_gene:None                     |
| SLC25A13  | 1 | pos_gene,IRAK1                    |
| GRK6      | 0 | pos_gene:None                     |
| DPP6      | 0 | pos_gene:None                     |
| PYGL      | 1 | pos_gene,DNM2                     |
| MTA3      | 1 | pos_gene,RAD21                    |
| PRDX6     | 2 | pos_gene,CYBB,PRDX2               |

|         |    |                                                         |
|---------|----|---------------------------------------------------------|
| C3orf52 | 23 | pos_gene,CD33,CD9,MRGPRX3,PTCH1,SLC35B2                 |
| TULP1   | 0  | pos_gene:None                                           |
| TMTC3   | 3  | pos_gene,CD72,EGF,LSR                                   |
| DHX36   | 1  | pos_gene,FUBP1                                          |
| RHO     | 0  | pos_gene:None                                           |
| IMPDH2  | 0  | pos_gene:None                                           |
| ACSL3   | 0  | pos_gene:None                                           |
| YBX3    | 0  | pos_gene:None                                           |
| SCN2A   | 1  | pos_gene,TMEM37                                         |
| MEP1B   | 8  | pos_gene,CD40LG,ERBB2,HSPD1,JAK2,JAK3,PRKCQ,RASA1,STAT3 |
| TPCN2   | 2  | pos_gene,CD83,CXCR1                                     |
| ACADVL  | 0  | pos_gene:None                                           |
| LBR     | 0  | pos_gene:None                                           |
| RAB35   | 0  | pos_gene:None                                           |
| FOXP4   | 1  | pos_gene,TOP2A                                          |
| MYO1B   | 0  | pos_gene:None                                           |
| GPR25   | 1  | pos_gene,CD52                                           |
| GYPB    | 0  | pos_gene:None                                           |
| MAB21L2 | 2  | pos_gene,CDH1,JUP                                       |
| ARL4A   | 1  | pos_gene,BIRC5                                          |
| LAP3    | 0  | pos_gene:None                                           |
| RABEP1  | 1  | pos_gene,RBBP8                                          |
| ABCE1   | 1  | pos_gene,DLD                                            |
| PKN3    | 0  | pos_gene:None                                           |
| FAT1    | 0  | pos_gene:None                                           |
| EIF4G3  | 1  | pos_gene,PSMC3                                          |
| GCDH    | 0  | pos_gene:None                                           |
| CHD7    | 0  | pos_gene:None                                           |
| XPO6    | 0  | pos_gene:None                                           |
| CTDP1   | 0  | pos_gene:None                                           |
| SORD    | 0  | pos_gene:None                                           |
| WIPI2   | 0  | pos_gene:None                                           |
| PLCB2   | 3  | pos_gene,JAK2,JAK3,PRKCQ                                |
| FBXO45  | 1  | pos_gene,KITLG                                          |
| TRIP11  | 0  | pos_gene:None                                           |
| SLC6A3  | 0  | pos_gene:None                                           |
| CAP1    | 1  | pos_gene,ACTBL2                                         |
| RGS4    | 0  | pos_gene:None                                           |
| PPP2R5A | 0  | pos_gene:None                                           |
| GART    | 1  | pos_gene,AFF1                                           |
| ANKRD46 | 1  | pos_gene,PLXNA2                                         |
| HNFB4G  | 0  | pos_gene:None                                           |
| ABCB10  | 1  | pos_gene,NRAS                                           |

|          |   |                                           |
|----------|---|-------------------------------------------|
| SLC4A7   | 4 | pos_gene,ATP2A2,CA2,NOS3,SLC9A3R1         |
| NRP2     | 4 | pos_gene,CNTN2,FAT3,FAT4,FLT1             |
| SPECC1L  | 0 | pos_gene:None                             |
| GOLGA7   | 2 | pos_gene,MLLT10,MTX1                      |
| CCAR2    | 1 | pos_gene,ELL                              |
| ADCY3    | 0 | pos_gene:None                             |
| IL31RA   | 4 | pos_gene,IL6ST,LIF,LIFR                   |
| EIF4A1   | 0 | pos_gene:None                             |
| PIK3C2B  | 0 | pos_gene:None                             |
| USP19    | 0 | pos_gene:None                             |
| TMTC4    | 2 | pos_gene,CD72,EGF                         |
| EMC2     | 1 | pos_gene,NME2                             |
| SPATA18  | 0 | pos_gene:None                             |
| HMG20A   | 1 | pos_gene,CEBPE                            |
| PCDH20   | 5 | pos_gene,ABCG2,CD83,FCGR1A,IL2RG,TNFRSF1A |
| HSF1     | 0 | pos_gene:None                             |
| IPO11    | 1 | pos_gene,PRDX2                            |
| VGLL3    | 0 | pos_gene:None                             |
| TRIM11   | 0 | pos_gene:None                             |
| BAG5     | 0 | pos_gene:None                             |
| RBM3     | 0 | pos_gene:None                             |
| TNS3     | 2 | pos_gene,BCL2L1,CAV1                      |
| LPCAT1   | 1 | pos_gene,SI                               |
| BAG6     | 2 | pos_gene,E2F1,IL18                        |
| LPXN     | 3 | pos_gene,ILK,PICALM,SERPINB2              |
| CSDE1    | 0 | pos_gene:None                             |
| TIMM50   | 1 | pos_gene,MAT2A                            |
| GCC2     | 0 | pos_gene:None                             |
| SOCS6    | 0 | pos_gene:None                             |
| COG2     | 2 | pos_gene,CD274,STX4                       |
| SEC62    | 4 | pos_gene,CREB1,MAPK14,SRF,XBP1            |
| CDH15    | 1 | pos_gene,F2R                              |
| MATK     | 1 | pos_gene,CD9                              |
| CEACAM21 | 1 | pos_gene,PIM1                             |
| USO1     | 0 | pos_gene:None                             |
| DAB1     | 1 | pos_gene,ABCB1                            |
| ATP2B4   | 3 | pos_gene,CD22,GP1BA,SI                    |
| RASD1    | 1 | pos_gene,CXCR2                            |
| WDFY3    | 0 | pos_gene:None                             |
| CTPS2    | 0 | pos_gene:None                             |
| RPAP2    | 0 | pos_gene:None                             |
| ELMO3    | 0 | pos_gene:None                             |
| NR1D2    | 1 | pos_gene,CTCF                             |

|          |    |                                  |
|----------|----|----------------------------------|
| AGTR1    | 1  | pos_gene,F2R                     |
| SNCAIP   | 0  | pos_gene:None                    |
| MARK1    | 0  | pos_gene:None                    |
| RGS17    | 10 | pos_gene,RBBP8                   |
| SSTR2    | 0  | pos_gene:None                    |
| HSD11B1  | 4  | pos_gene,CD9,MAP4K1,PTPRT,SLC3A1 |
| NRG2     | 0  | pos_gene:None                    |
| ANKRA2   | 0  | pos_gene:None                    |
| FKBP4    | 0  | pos_gene:None                    |
| TMEM237  | 2  | pos_gene,MRGPRX3,SLC35B2         |
| MTCH1    | 0  | pos_gene:None                    |
| POGZ     | 1  | pos_gene,LYL1                    |
| EEF1B2   | 0  | pos_gene:None                    |
| KIF3C    | 0  | pos_gene:None                    |
| DEGS1    | 1  | pos_gene,NRAS                    |
| CENPF    | 0  | pos_gene:None                    |
| GAD1     | 0  | pos_gene:None                    |
| ADRA2A   | 0  | pos_gene:None                    |
| RGS14    | 0  | pos_gene:None                    |
| ABCA3    | 4  | pos_gene,CD72,EGF,LSR,NRAS       |
| TMEM205  | 2  | pos_gene,CD72,LSR                |
| LEMD3    | 3  | pos_gene,CD72,EGF,LSR            |
| MAPK8IP3 | 0  | pos_gene:None                    |
| S1PR5    | 1  | pos_gene,F2R                     |
| ATIC     | 1  | pos_gene,AHCY                    |
| LMBR1L   | 2  | pos_gene,COX10,PRRT2             |
| CD244    | 3  | pos_gene,CD2,IL18R1,PTPRC        |
| CAPRIN1  | 0  | pos_gene:None                    |
| KCNS3    | 2  | pos_gene,PREP,VANGL2             |
| SLC17A2  | 2  | pos_gene,IL4R,TNFRSF17           |
| CD55     | 21 | pos_gene,C2,CD14,CR2             |
| KDM4A    | 0  | pos_gene:None                    |
| ATP4A    | 19 | pos_gene,BCL2L1,CCR5,CXCR4,MRC1  |
| SLC35A3  | 1  | pos_gene,PTCH1                   |
| SRSF7    | 0  | pos_gene:None                    |
| POLDIP2  | 0  | pos_gene:None                    |
| GDPD5    | 1  | pos_gene,TNFRSF17                |
| DSE      | 0  | pos_gene:None                    |
| IPO7     | 1  | pos_gene,ILK                     |
| MED10    | 0  | pos_gene:None                    |
| ARPC5    | 0  | pos_gene:None                    |
| RCC2     | 0  | pos_gene:None                    |
| PTGS2    | 0  | pos_gene:None                    |

|          |   |                                    |
|----------|---|------------------------------------|
| S1PR4    | 1 | pos_gene,F2R                       |
| BAG1     | 0 | pos_gene:None                      |
| PCDHA3   | 2 | pos_gene,IL4R,IL9R                 |
| LTV1     | 0 | pos_gene:None                      |
| TH       | 4 | pos_gene,CRABP1,ERCC8              |
| STK24    | 2 | pos_gene,CD274,STX4                |
| GMPPA    | 0 | pos_gene:None                      |
| BAG3     | 2 | pos_gene,BID,LIF                   |
| P4HB     | 2 | pos_gene,GPX4,PREP                 |
| SPRED1   | 4 | pos_gene,CEACAM5,MLLT10,PAX5,STAG2 |
| DTL      | 1 | pos_gene,RUNX1T1                   |
| RGS20    | 4 | pos_gene,BCL2L1,CCR5,CXCR2,CXCR4   |
| MOV10    | 1 | pos_gene,CBFB                      |
| INTS7    | 0 | pos_gene:None                      |
| ATF6B    | 4 | pos_gene,CREB1,MAPK14,SRF,XBP1     |
| RAC2     | 2 | pos_gene,CRKL,CYBB                 |
| ALPP     | 0 | pos_gene:None                      |
| UBXN2A   | 0 | pos_gene:None                      |
| PLOD2    | 2 | pos_gene,DNTT,TNFSF13              |
| RBM10    | 2 | pos_gene,EWSR1,SDC1                |
| UBXN2B   | 0 | pos_gene:None                      |
| TSHB     | 6 | pos_gene,CGA                       |
| TCOF1    | 2 | pos_gene,KDM6A,KMT2C               |
| CDCP1    | 1 | pos_gene,CP                        |
| AARS2    | 0 | pos_gene:None                      |
| NAT10    | 2 | pos_gene,AATF,RPL34                |
| EDEM3    | 1 | pos_gene,HSPA4L                    |
| PCDHGB1  | 1 | pos_gene,PLXNA2                    |
| APLP2    | 0 | pos_gene:None                      |
| HSD17B12 | 1 | pos_gene,ABCC1                     |
| LAPTM4B  | 0 | pos_gene:None                      |
| AIMP1    | 0 | pos_gene:None                      |
| CERS2    | 0 | pos_gene:None                      |
| FARP1    | 1 | pos_gene,TYMS                      |
| KLF11    | 1 | pos_gene,RBBP8                     |
| GYG1     | 2 | pos_gene,CEACAM6,DNM2              |
| RXFP1    | 1 | pos_gene,PKIA                      |
| KCTD3    | 1 | pos_gene,NF1                       |
| ARHGAP10 | 0 | pos_gene:None                      |
| SMG7     | 6 | pos_gene,ARID1B,FAT4,MLLT6,TET1    |
| RNF19A   | 0 | pos_gene:None                      |
| ALDH3A2  | 2 | pos_gene,NME1,TGOLN2               |
| NUP210   | 0 | pos_gene:None                      |

|         |    |                                       |
|---------|----|---------------------------------------|
| EPB41L2 | 21 | pos_gene,BIRC3,CCND2,MLF1,MLLT1,ZMYM3 |
| DYRK2   | 0  | pos_gene:None                         |
| UBR3    | 3  | pos_gene,LGALS4,MYO1G,PLXNA2          |
| FSTL1   | 13 | pos_gene,AMD1,IL12A,WNT5A             |
| PIK3C2A | 0  | pos_gene:None                         |
| GALNT11 | 10 | pos_gene,DHRS9                        |
| LIN7C   | 0  | pos_gene:None                         |
| SGCB    | 1  | pos_gene,CXCR1                        |
| SRSF3   | 0  | pos_gene:None                         |
| MTMR6   | 0  | pos_gene:None                         |
| JAGN1   | 1  | pos_gene,NRAS                         |
| NBEAL2  | 1  | pos_gene,DAZL                         |
| CTSD    | 1  | pos_gene,TG                           |
| SNX21   | 1  | pos_gene,AMD1                         |
| CHD1L   | 0  | pos_gene:None                         |
| USP4    | 1  | pos_gene,IRF8                         |
| PARK7   | 2  | pos_gene,MLLT6,TRAP1                  |
| CDYL    | 4  | pos_gene:EGFR,CREBBP,RAD21,EZH2       |

### **Sample 027**

| <b>Sample-specific Candidate AML genes</b> | <b>Number of specific interactions</b> | <b>In which module of known AML gene</b>              |
|--------------------------------------------|----------------------------------------|-------------------------------------------------------|
| SORBS3                                     | 2                                      | pos_gene,CAPN2,FLT3                                   |
| HGF                                        | 24                                     | pos_gene,GP1BA,IL7,IL7R,ITGA5                         |
| RGMB                                       | 1                                      | pos_gene,CASP3                                        |
| TUBGCP3                                    | 1                                      | pos_gene,S100A8                                       |
| PCGF1                                      | 4                                      | pos_gene,MLLT1,MLLT3,PAX5,SUZ12                       |
| SUFU                                       | 1                                      | pos_gene,BCL2                                         |
| PSMD3                                      | 3                                      | pos_gene,CCND2,MLF1,PSMD9                             |
| RAB1A                                      | 1                                      | pos_gene,BRAF                                         |
| KIF22                                      | 0                                      | pos_gene:None                                         |
| BRPF3                                      | 1                                      | pos_gene,HOXA9                                        |
| RPL9                                       | 2                                      | pos_gene,CTNNA1,RPL34                                 |
| MECP2                                      | 2                                      | pos_gene,NSD1,VEGFA                                   |
| KHDRBS1                                    | 0                                      | pos_gene:None                                         |
| ANKRD1                                     | 0                                      | pos_gene:None                                         |
| SOX9                                       | 0                                      | pos_gene:None                                         |
| ECSIT                                      | 22                                     | pos_gene,CYP24A1,ECT2L,FAS,NOS3                       |
| CRTC2                                      | 0                                      | pos_gene:None                                         |
| AP1M1                                      | 5                                      | pos_gene,CD86,CTLA4,FLI1,SELPLG,VANGL2                |
| FBXO7                                      | 8                                      | pos_gene,ASXL1,ASXL2,BID,CCNY,GFAP,KRAS,NFKB1,SLC39A2 |
| KLHL20                                     | 0                                      | pos_gene:None                                         |

|          |    |                                  |
|----------|----|----------------------------------|
| POLE3    | 0  | pos_gene:None                    |
| NIPBL    | 1  | pos_gene,MLLT3                   |
| STAM2    | 2  | pos_gene,JAK2,JAK3               |
| EIF3L    | 0  | pos_gene:None                    |
| FOXC2    | 4  | pos_gene,BCL11B,BCOR,RARA,SALL4  |
| APOA1    | 22 | pos_gene,APP,CD40LG,CP,HBA2,XPO1 |
| FOXA2    | 2  | pos_gene,BCOR,CTCF               |
| POLR1C   | 4  | pos_gene,CNTN2,MSH6,NFKBIB       |
| REV1     | 1  | pos_gene,MSH2                    |
| FBXO25   | 0  | pos_gene:None                    |
| GAS7     | 0  | pos_gene:None                    |
| COL4A1   | 4  | pos_gene,FAT3,FCGR3A,SNCA,THBS1  |
| PHF1     | 0  | pos_gene:None                    |
| LIG3     | 0  | pos_gene:None                    |
| PNKP     | 0  | pos_gene:None                    |
| TREX1    | 0  | pos_gene:None                    |
| FOXK2    | 2  | pos_gene,KDM6A,KMT2C             |
| CCDC88A  | 0  | pos_gene:None                    |
| RAB8A    | 3  | pos_gene,CD86,CTLA4              |
| FOXD3    | 1  | pos_gene,BTG1                    |
| WASF2    | 1  | pos_gene,BTK                     |
| TNKS1BP1 | 1  | pos_gene,UIMC1                   |

### **Sample 168**

| <b>Sample-specific Candidate AML genes</b> | <b>Number of specific interactions</b> | <b>In which module of known AML gene</b> |
|--------------------------------------------|----------------------------------------|------------------------------------------|
| TPGS2                                      | 4                                      | pos_gene,ACTBL2,CNOT3,HSD3B1,SCYL1       |
| CCNE1                                      | 6                                      | pos_gene,CDK4,CDK6,CKS1B,RB1,SF3B1,TERT  |
| TACC1                                      | 0                                      | pos_gene:None                            |
| CPSF3                                      | 1                                      | pos_gene,ANKRD49                         |
| SCLT1                                      | 0                                      | pos_gene:None                            |
| DCAF7                                      | 1                                      | pos_gene,SETBP1                          |
| MYL12A                                     | 0                                      | pos_gene:None                            |
| BDNF                                       | 1                                      | pos_gene,NCAM1                           |
| RPL37A                                     | 0                                      | pos_gene:None                            |
| NAP1L1                                     | 1                                      | pos_gene,MAGED2                          |
| HNF1B                                      | 1                                      | pos_gene,HNF1A                           |
| TNNI2                                      | 1                                      | pos_gene,TLX3                            |
| SYT17                                      | 1                                      | pos_gene,PNMA3                           |
| KCNMB2                                     | 0                                      | pos_gene:None                            |
| MYL9                                       | 0                                      | pos_gene:None                            |

|         |    |                                                                    |
|---------|----|--------------------------------------------------------------------|
| TDRD7   | 0  | pos_gene:None                                                      |
| BMP7    | 1  | pos_gene,BMP6                                                      |
| WIPF1   | 0  | pos_gene:None                                                      |
| SYCE1   | 0  | pos_gene:None                                                      |
| VAMP8   | 0  | pos_gene:None                                                      |
| SKA1    | 0  | pos_gene:None                                                      |
| TXK     | 0  | pos_gene:None                                                      |
| MZT2B   | 0  | pos_gene:None                                                      |
| TUBG2   | 0  | pos_gene:None                                                      |
| SETD7   | 19 | pos_gene,KLF4                                                      |
| CD28    | 23 | pos_gene,CBL,CD2,CD4,CD79A,CD86,CTLA4,FCGR3A,IFNAR1,JAK2,LCK,RASA1 |
| AQR     | 1  | pos_gene,SETD2                                                     |
| RBM45   | 0  | pos_gene:None                                                      |
| SNX1    | 1  | pos_gene,EPM2A                                                     |
| PRMT6   | 1  | pos_gene,HSP90AA1                                                  |
| MED6    | 0  | pos_gene:None                                                      |
| LEPR    | 0  | pos_gene:None                                                      |
| MZT1    | 0  | pos_gene:None                                                      |
| POLK    | 0  | pos_gene:None                                                      |
| POC1A   | 2  | pos_gene,CNOT3,SCYL1                                               |
| RBL2    | 1  | pos_gene,E2F1                                                      |
| THOC2   | 1  | pos_gene,ZMYM3                                                     |
| UBTF    | 1  | pos_gene,ZMYM2                                                     |
| ACTL6B  | 3  | pos_gene,ARID1A,ARID1B,NEUROD1                                     |
| NRBF2   | 1  | pos_gene,DCT                                                       |
| TXNDC12 | 1  | pos_gene,FPGS                                                      |
| TSG101  | 2  | pos_gene,AATF,MUSK                                                 |
| CSTF2   | 0  | pos_gene:None                                                      |
| SKA3    | 0  | pos_gene:None                                                      |
| CCNC    | 1  | pos_gene,CKS1B                                                     |
| SDCBP   | 6  | pos_gene,CD5,CD6,SDC1                                              |
| GNB3    | 1  | pos_gene,GNAI1                                                     |
| PBRM1   | 4  | pos_gene,ARID1A,ARID1B,CDX2,NEUROD1                                |
| TCF7    | 1  | pos_gene,FHIT                                                      |
| SS18L1  | 0  | pos_gene:None                                                      |
| STAT4   | 53 | pos_gene,IL2RA,IL2RB,IRF4,TBX21                                    |
| MEN1    | 4  | pos_gene,FANCA,MYB,PSIP1,WT1                                       |
| LCA5    | 1  | pos_gene,PRAME                                                     |
| CD79B   | 3  | pos_gene,CD19,CR2,PTPRC                                            |
| EXTL3   | 1  | pos_gene,VANGL2                                                    |
| ITK     | 0  | pos_gene:None                                                      |
| PRLR    | 20 | pos_gene,GH1,GHR                                                   |



|          |   |                                                  |
|----------|---|--------------------------------------------------|
| FOXM1    | 0 | pos_gene:None                                    |
| LRRCC1   | 0 | pos_gene:None                                    |
| MED11    | 0 | pos_gene:None                                    |
| CFHR1    | 2 | pos_gene,C3                                      |
| MKNK1    | 1 | pos_gene,JAK1                                    |
| CCNB1    | 1 | pos_gene,RB1                                     |
| RAB3IP   | 1 | pos_gene,NF1                                     |
| SH2B2    | 0 | pos_gene:None                                    |
| TEKT1    | 2 | pos_gene,EFHC1,IKZF1                             |
| CC2D1A   | 0 | pos_gene:None                                    |
| STX7     | 1 | pos_gene,CD70                                    |
| LIMD1    | 0 | pos_gene:None                                    |
| SMARCC2  | 6 | pos_gene,ARID1A,ARID1B,BCL3,FLI1,NEUROD1,TBL1XR1 |
| KNSTRN   | 0 | pos_gene:None                                    |
| MMS22L   | 0 | pos_gene:None                                    |
| CYCS     | 1 | pos_gene,PRDX2                                   |
| LMNB2    | 0 | pos_gene:None                                    |
| EIF4EBP1 | 0 | pos_gene:None                                    |
| TLE4     | 0 | pos_gene:None                                    |
| SLAIN2   | 2 | pos_gene,EED,SUZ12                               |
| QRFPR    | 0 | pos_gene:None                                    |
| LIMS1    | 2 | pos_gene,ILK,TKT                                 |
| SIN3B    | 1 | pos_gene,CDCA7L                                  |
| SMARCD2  | 4 | pos_gene,ARID1A,ARID1B,FLI1,NEUROD1              |
| NPAT     | 0 | pos_gene:None                                    |
| EPN3     | 3 | pos_gene,CASP2,ITGA4,TFRC                        |
| MED21    | 1 | pos_gene,CKS1B                                   |
| TOM1L1   | 0 | pos_gene:None                                    |
| FAM83D   | 0 | pos_gene:None                                    |

### **Sample 270**

| <b>Sample-specific Candidate AML genes</b> | <b>Number of specific interactions</b> | <b>In which module of known AML gene</b> |
|--------------------------------------------|----------------------------------------|------------------------------------------|
| LINGO2                                     | 0                                      | pos_gene:None                            |
| AIP                                        | 1                                      | pos_gene,PREP                            |
| FAM110A                                    | 0                                      | pos_gene:None                            |
| GAS8                                       | 2                                      | pos_gene,BRCA1,CBFA2T3                   |
| KRT9                                       | 0                                      | pos_gene:None                            |
| CASR                                       | 0                                      | pos_gene:None                            |
| ADORA2A                                    | 2                                      | pos_gene,CNR1,PRKCQ                      |
| SEC24C                                     | 0                                      | pos_gene:None                            |
| PIK3C3                                     | 1                                      | pos_gene,USP18                           |

|         |   |                                                |
|---------|---|------------------------------------------------|
| COX5B   | 1 | pos_gene,CASP2                                 |
| OPA3    | 0 | pos_gene:None                                  |
| BCKDHA  | 2 | pos_gene,DLD,PPM1K                             |
| CACNA1H | 1 | pos_gene,CAV1                                  |
| ARC     | 0 | pos_gene:None                                  |
| IL16    | 0 | pos_gene:None                                  |
| RELB    | 6 | pos_gene,BCL3,BIRC3,CLTC,IL1B,IRF4,NFKB2       |
| JMJD1C  | 0 | pos_gene:None                                  |
| HMOX1   | 2 | pos_gene,LSR,RNF130                            |
| DYNLT1  | 2 | pos_gene,CASP8,TCF15                           |
| DYNLT3  | 0 | pos_gene:None                                  |
| IL17A   | 6 | pos_gene,IL2                                   |
| ATXN7L3 | 4 | pos_gene,BRCA2,MED12,TCF3,TRRAP                |
| CCP110  | 0 | pos_gene:None                                  |
| DKK3    | 0 | pos_gene:None                                  |
| RTN4IP1 | 0 | pos_gene:None                                  |
| CIAO1   | 2 | pos_gene,PCNA,WT1                              |
| C1D     | 0 | pos_gene:None                                  |
| HEY2    | 6 | pos_gene,ETV6,FLI1,MAPK8,SYK,TP73,ZBTB16       |
| DNAJC5  | 7 | pos_gene,CD2,EDN1,PPARG,STX4,SYNJ1,VAMP1,VAMP2 |
| EIF2S3  | 4 | pos_gene,CASP9,DIO3,MAPK3,RASA1                |
| CEP95   | 0 | pos_gene:None                                  |
| DET1    | 0 | pos_gene:None                                  |
| DYNLRB1 | 1 | pos_gene,ELL                                   |
| AP4M1   | 0 | pos_gene:None                                  |
| ROCK2   | 1 | pos_gene,MBP                                   |
| RBFOX2  | 0 | pos_gene:None                                  |
| DVL1    | 1 | pos_gene,F2R                                   |
| DDX42   | 2 | pos_gene,CASP8,HSPA4                           |
| TUBB4A  | 4 | pos_gene,LRP1,NRAS,PLEKHM1,TNFRSF1A            |
| GSPT2   | 1 | pos_gene,EGFR                                  |
| HAUS1   | 0 | pos_gene:None                                  |
| IGF2BP3 | 0 | pos_gene:None                                  |
| GNAZ    | 3 | pos_gene,BIRC2,FOS,HSP90AA1                    |
| HAUS5   | 0 | pos_gene:None                                  |
| TAF13   | 1 | pos_gene,CTCF                                  |

### **Sample 472**

| <b>Sample-specific Candidate AML genes</b> | <b>Number of specific interactions</b> | <b>In which module of known AML gene</b> |
|--------------------------------------------|----------------------------------------|------------------------------------------|
| SV2A                                       | 0                                      | pos_gene:None                            |
| CLTA                                       | 3                                      | pos_gene,ITGA4,PICALM,SYNJ1              |

|         |    |                                                |
|---------|----|------------------------------------------------|
| CRTAC1  | 2  | pos_gene,ANXA5,AZGP1                           |
| MYRIP   | 0  | pos_gene:None                                  |
| HCRTR2  | 0  | pos_gene:None                                  |
| ITGA3   | 2  | pos_gene,CD38,CSPG4                            |
| TRADD   | 0  | pos_gene:None                                  |
| SMOC2   | 1  | pos_gene,CD40LG                                |
| SPEN    | 2  | pos_gene,ICOS,RBBP8                            |
| LAMA3   | 1  | pos_gene,GH1                                   |
| NDUFS5  | 1  | pos_gene,PHB2                                  |
| NAV2    | 8  | pos_gene,CDH1,MKI67                            |
| ANKRD2  | 0  | pos_gene:None                                  |
| MEAF6   | 1  | pos_gene,TRRAP                                 |
| EID3    | 0  | pos_gene:None                                  |
| MED12L  | 14 | pos_gene,CKS1B                                 |
| TGFBR3  | 0  | pos_gene:None                                  |
| C1QTNF9 | 1  | pos_gene,IL12A                                 |
| PCSK2   | 0  | pos_gene:None                                  |
| ZFYVE27 | 1  | pos_gene,SLC39A2                               |
| MSH5    | 0  | pos_gene:None                                  |
| OLFM3   | 0  | pos_gene:None                                  |
| MYH14   | 0  | pos_gene:None                                  |
| KCNC2   | 0  | pos_gene:None                                  |
| SUMF1   | 0  | pos_gene:None                                  |
| CYP1B1  | 0  | pos_gene:None                                  |
| NDRG1   | 0  | pos_gene:None                                  |
| SUDS3   | 0  | pos_gene:None                                  |
| ADAMTS2 | 0  | pos_gene:None                                  |
| JAM2    | 0  | pos_gene:None                                  |
| COL7A1  | 2  | pos_gene,CSF1R,GH1                             |
| VWF     | 19 | pos_gene,GP1BA,IL7,PDGFB,THBS1,TNFSF10,TNFSF13 |
| PELI1   | 18 | pos_gene,IRAK1,MYD88,TLR7                      |
| ITIH2   | 1  | pos_gene,LPL                                   |
| GLB1L2  | 0  | pos_gene:None                                  |
| PKN2    | 0  | pos_gene:None                                  |
| EYA2    | 1  | pos_gene,MRC2                                  |
| PKP3    | 1  | pos_gene,CTNNA1                                |
| ZFPM2   | 20 | pos_gene,EZH2,GATA1                            |
| ADAM12  | 5  | pos_gene,EGF,PACSIN3                           |
| COLEC12 | 0  | pos_gene:None                                  |
| KCNJ2   | 0  | pos_gene:None                                  |
| MYO1E   | 0  | pos_gene:None                                  |
| TONSL   | 0  | pos_gene:None                                  |
| C8B     | 5  | pos_gene,C5,CD59                               |

|          |    |                                     |
|----------|----|-------------------------------------|
| MYO15A   | 0  | pos_gene:None                       |
| ORC1     | 1  | pos_gene,PHF6                       |
| COCH     | 0  | pos_gene:None                       |
| GABRA2   | 0  | pos_gene:None                       |
| EYS      | 1  | pos_gene,EGFR                       |
| LMX1B    | 2  | pos_gene,MDM2,PBX1                  |
| GPC6     | 7  | pos_gene,DLX4                       |
| SPAG16   | 0  | pos_gene:None                       |
| UHRF2    | 4  | pos_gene,CHD2,DNMT1,DNMT3A,SPI1     |
| SPATA13  | 0  | pos_gene:None                       |
| NBR1     | 0  | pos_gene:None                       |
| SEMA5A   | 0  | pos_gene:None                       |
| CLIP1    | 0  | pos_gene:None                       |
| COL2A1   | 6  | pos_gene,ANXA5,FAT3,FGFR2,MBP,PDGFB |
| TLN2     | 1  | pos_gene,ITGB2                      |
| NAALADL2 | 0  | pos_gene:None                       |
| CDH3     | 0  | pos_gene:None                       |
| RIT2     | 0  | pos_gene:None                       |
| SCN4B    | 0  | pos_gene:None                       |
| GABRG1   | 0  | pos_gene:None                       |
| GABRA6   | 0  | pos_gene:None                       |
| GNG10    | 13 | pos_gene,CCR1,GNAI1                 |
| FGG      | 22 | pos_gene,F2,ICAM1,ITGAM             |
| C8A      | 4  | pos_gene,C5,CD59                    |
| PLCB4    | 0  | pos_gene:None                       |
| HDGF     | 0  | pos_gene:None                       |
| KIRREL3  | 0  | pos_gene:None                       |
| TEAD4    | 0  | pos_gene:None                       |
| GABRG3   | 0  | pos_gene:None                       |
| HCFC1    | 3  | pos_gene,HNF4A,PPARGC1A,JUN         |

### **Sample 546**

| <b>Sample-specific Candidate AML genes</b> | <b>Number of specific interactions</b> | <b>In which module of known AML gene</b> |
|--------------------------------------------|----------------------------------------|------------------------------------------|
| EMILIN2                                    | 0                                      | pos_gene:None                            |
| ZNF638                                     | 0                                      | pos_gene:None                            |
| FLT4                                       | 2                                      | pos_gene,GNAS,KDR                        |
| HR                                         | 1                                      | pos_gene,TBL1XR1                         |
| HOXC8                                      | 1                                      | pos_gene,ERBB4                           |
| STARD7                                     | 0                                      | pos_gene:None                            |
| NEK7                                       | 47                                     | pos_gene,ACTBL2,CNOT3,DHRS9,HSD3B1,SCYL1 |
| DNMT3B                                     | 1                                      | pos_gene,DNMT3A                          |

|           |    |                                                   |
|-----------|----|---------------------------------------------------|
| F11R      | 4  | pos_gene,CD69,CD79A,MS4A3,TYMS                    |
| DIAPH1    | 0  | pos_gene:None                                     |
| LOXL2     | 1  | pos_gene,GH1                                      |
| RPL23     | 3  | pos_gene,DIO3,RASA1,RPL5                          |
| STOM      | 3  | pos_gene,MRGPRX3,RTKN,TNFRSF10B                   |
| VPS52     | 1  | pos_gene,WTAP                                     |
| U2SURP    | 0  | pos_gene:None                                     |
| INCA1     | 0  | pos_gene:None                                     |
| TOMM40    | 6  | pos_gene,BAX,COX10,DLD,HSPB1,PHB2,RASGRP3         |
| THRAP3    | 0  | pos_gene:None                                     |
| PXDN      | 0  | pos_gene:None                                     |
| IQGAP2    | 0  | pos_gene:None                                     |
| CYP2S1    | 0  | pos_gene:None                                     |
| MRRF      | 0  | pos_gene:None                                     |
| CALCOCO2  | 1  | pos_gene,C3                                       |
| TSC22D1   | 1  | pos_gene,MAGED2                                   |
| RANBP9    | 1  | pos_gene,HMBS                                     |
| MAPK11    | 0  | pos_gene:None                                     |
| STC2      | 1  | pos_gene,GH1                                      |
| SDHC      | 0  | pos_gene:None                                     |
| PA2G4     | 0  | pos_gene:None                                     |
| NTNG2     | 0  | pos_gene:None                                     |
| RAB11FIP5 | 1  | pos_gene,CXCR2                                    |
| HSPA1B    | 0  | pos_gene:None                                     |
| DRD1      | 0  | pos_gene:None                                     |
| ACACA     | 0  | pos_gene:None                                     |
| ACAD9     | 0  | pos_gene:None                                     |
| KLHL1     | 0  | pos_gene:None                                     |
| SORL1     | 8  | pos_gene,IL6,IL6R,IL6ST,LIFR,NCAM1,RHOH,SDC1      |
| TRIP6     | 2  | pos_gene,HOXA9,SET                                |
| ITGA2     | 2  | pos_gene,CD53,CD9                                 |
| OGG1      | 1  | pos_gene,ERCC8                                    |
| MTCH2     | 0  | pos_gene:None                                     |
| AGAP1     | 0  | pos_gene:None                                     |
| ATP6V0A4  | 1  | pos_gene,TNFRSF1B                                 |
| PTBP1     | 24 | pos_gene,DNMT1,HMBS,HSD3B1,PKIA,RORA,TYMS,ZMYM2   |
| PEBP1     | 1  | pos_gene,ICOS                                     |
| PROS1     | 11 | pos_gene,CP,CTSG,F2,F2RL1,F3,F5,THBD              |
| TAF15     | 2  | pos_gene,FLI1,HBG2                                |
| DCUN1D1   | 2  | pos_gene,EDN1,HMBS                                |
| COLEC11   | 1  | pos_gene,C2                                       |
| SDC4      | 7  | pos_gene,CD36,CD40LG,IL7,IL7R,NCAM1,TNFSF13,VEGFA |
| SRSF10    | 1  | pos_gene,TYMS                                     |

|        |    |                     |
|--------|----|---------------------|
| RPRD2  | 17 | pos_gene,HSPA8,XPO1 |
| THOC5  | 1  | pos_gene,MYO1G      |
| TNNT2  | 1  | pos_gene,NOS3       |
| ADRA1B | 0  | pos_gene:None       |
| CPE    | 0  | pos_gene:None       |
| KCNH2  | 1  | pos_gene,RHOH       |
| NTN4   | 2  | pos_gene,RASA1,RPL5 |
| MICU2  | 0  | pos_gene:None       |
| VTI1A  | 0  | pos_gene:None       |
| EOGT   | 5  | pos_gene,APP        |
| KMT2E  | 0  | pos_gene:None       |

### **Sample 629**

| <b>Sample-specific Candidate AML genes</b> | <b>Number of specific interactions</b> | <b>In which module of known AML gene</b>      |
|--------------------------------------------|----------------------------------------|-----------------------------------------------|
| LGALS3BP                                   | 6                                      | pos_gene,CD14,MRC2,PDGFB                      |
| RPL11                                      | 6                                      | pos_gene,HBG2,NFKBIB,RPL10,RPL19,RPL5,TP73    |
| METTL14                                    | 0                                      | pos_gene:None                                 |
| BCAP31                                     | 3                                      | pos_gene,CASP1,RET,VAMP1                      |
| RPL7A                                      | 1                                      | pos_gene,HBG2                                 |
| KLHL2                                      | 0                                      | pos_gene:None                                 |
| TCF20                                      | 0                                      | pos_gene:None                                 |
| OTC                                        | 0                                      | pos_gene:None                                 |
| KCNA1                                      | 0                                      | pos_gene:None                                 |
| NXF1                                       | 1                                      | pos_gene,AATF                                 |
| EDA                                        | 5                                      | pos_gene,IL2RG,IL9R,LSR,PIK3R1                |
| UNC93B1                                    | 8                                      | pos_gene,ERVW-1,GGH,MAGED2,PRRT2,SIGLEC9,TLR7 |
| GIT1                                       | 0                                      | pos_gene:None                                 |
| MRPS15                                     | 0                                      | pos_gene:None                                 |
| NCSTN                                      | 0                                      | pos_gene:None                                 |
| OXCT1                                      | 1                                      | pos_gene,DCK                                  |
| USP10                                      | 1                                      | pos_gene,TBX21                                |
| MICU1                                      | 1                                      | pos_gene,FBXW7                                |
| NDUFA8                                     | 0                                      | pos_gene:None                                 |
| SNIP1                                      | 0                                      | pos_gene:None                                 |
| GTF3C4                                     | 0                                      | pos_gene:None                                 |
| IFT20                                      | 0                                      | pos_gene:None                                 |
| MAP2K2                                     | 6                                      | pos_gene,CASP9,CD70,CDH1,MAP4K1,SERPINB2,TKT  |
| BECN1                                      | 1                                      | pos_gene,MAPKAPK2                             |
| ANTXR2                                     | 0                                      | pos_gene:None                                 |
| RPS4X                                      | 0                                      | pos_gene:None                                 |
| LDB3                                       | 1                                      | pos_gene,ERBB4                                |

|         |   |                                                   |
|---------|---|---------------------------------------------------|
| FGB     | 5 | pos_gene,ICAM1,MAP2K1,NME2,PTPN11,WNK2            |
| SMCHD1  | 1 | pos_gene,APEX1                                    |
| KTN1    | 1 | pos_gene,CD68                                     |
| PCBP1   | 3 | pos_gene,BIRC3,CHEK2,PRDX2                        |
| CKMT1A  | 0 | pos_gene:None                                     |
| CDC6    | 0 | pos_gene:None                                     |
| IL20RA  | 0 | pos_gene:None                                     |
| GTF3C3  | 2 | pos_gene,EZH2,SMC1A                               |
| GTF3C5  | 0 | pos_gene:None                                     |
| CPT1A   | 0 | pos_gene:None                                     |
| WDR77   | 0 | pos_gene:None                                     |
| PKNOX2  | 1 | pos_gene,CD1A                                     |
| TANK    | 7 | pos_gene,BIRC2,CASP8,CD40,CNOT3,HSPA5,MYD88,PFND4 |
| MED20   | 0 | pos_gene:None                                     |
| PTPN3   | 3 | pos_gene,ERVW-1,VANGL1,VANGL2                     |
| NFIB    | 0 | pos_gene:None                                     |
| CALML5  | 0 | pos_gene:None                                     |
| ATPAF1  | 1 | pos_gene,DIABLO                                   |
| LAMTOR2 | 0 | pos_gene:None                                     |
| NUP155  | 0 | pos_gene:None                                     |
| PPP1R9B | 1 | pos_gene,GHR                                      |
| RAB14   | 1 | pos_gene,NISCH                                    |
| PRPF19  | 0 | pos_gene:None                                     |
| RPL31   | 5 | pos_gene,CRKL,RPL10,RPL19,RPL34,RPL5              |
| TRIM54  | 8 | pos_gene,CDKN1A,HBA2,HBB,HBG2,PCNA,TGOLN2,USP18   |
| ACO2    | 3 | pos_gene,IDH1,IDH2,PRDX2                          |

### **Sample 773**

| <b>Sample-specific Candidate AML genes</b> | <b>Number of specific interactions</b> | <b>In which module of known AML gene</b> |
|--------------------------------------------|----------------------------------------|------------------------------------------|
| CRX                                        | 1                                      | pos_gene,TLX3                            |
| ESRRB                                      | 0                                      | pos_gene:None                            |
| RRBP1                                      | 0                                      | pos_gene:None                            |
| PITX2                                      | 0                                      | pos_gene:None                            |
| USP2                                       | 0                                      | pos_gene:None                            |
| FOSB                                       | 0                                      | pos_gene:None                            |
| ARHGAP24                                   | 0                                      | pos_gene:None                            |
| SPARC                                      | 5                                      | pos_gene,CD36,CTSG,ELANE,FAT3,THBS1      |
| GORASP1                                    | 0                                      | pos_gene:None                            |
| ITGA8                                      | 0                                      | pos_gene:None                            |
| CLDN19                                     | 2                                      | pos_gene,C2,CD68                         |
| AGK                                        | 1                                      | pos_gene,SI                              |

|         |   |                                                     |
|---------|---|-----------------------------------------------------|
| UCHL1   | 5 | pos_gene,CDK5,MPL,NCAM1,TNFRSF1A,WBP1L              |
| IMMP1L  | 2 | pos_gene,MPL,MRC2                                   |
| PPP1R9A | 1 | pos_gene,DIO3                                       |
| GPRASP1 | 0 | pos_gene:None                                       |
| CUL4B   | 3 | pos_gene,CBFB,EGFR,ERCC8                            |
| PINK1   | 2 | pos_gene,CASP1,MPL                                  |
| VPS18   | 0 | pos_gene:None                                       |
| ELP2    | 0 | pos_gene:None                                       |
| SLC9A3  | 1 | pos_gene,TG                                         |
| MGST3   | 3 | pos_gene,CEACAM3,F3,MRGPRX3                         |
| UCHL5   | 4 | pos_gene,HBA2,MLLT6,RAN,SET                         |
| RABGEF1 | 0 | pos_gene:None                                       |
| PRMT5   | 0 | pos_gene:None                                       |
| TRIM32  | 0 | pos_gene:None                                       |
| SOCS3   | 1 | pos_gene,CTLA4                                      |
| GJB1    | 5 | pos_gene,CD53,MAML2,MRGPRX3,MUC1,RASGRP3            |
| PRKAB1  | 5 | pos_gene,HSPB1,JUN,MAP4K1,ST13,TNFRSF1A             |
| SPTBN4  | 0 | pos_gene:None                                       |
| TLK2    | 3 | pos_gene,HLF,IL23A                                  |
| RAP1GAP | 1 | pos_gene,RASGRP3                                    |
| PES1    | 0 | pos_gene:None                                       |
| RALY    | 3 | pos_gene,CD6,FOXP3,PHF6                             |
| ADD3    | 0 | pos_gene:None                                       |
| TACC2   | 0 | pos_gene:None                                       |
| COX5A   | 1 | pos_gene,SLC8A1                                     |
| THSD7A  | 3 | pos_gene,CD33                                       |
| MYOF    | 0 | pos_gene:None                                       |
| DNAL11  | 1 | pos_gene,HPS4                                       |
| TFDP2   | 0 | pos_gene:None                                       |
| KATNAL1 | 0 | pos_gene:None                                       |
| SYNJ2BP | 1 | pos_gene,CD14                                       |
| APPBP2  | 0 | pos_gene:None                                       |
| NUP153  | 8 | pos_gene,BIRC3,CDK4,EED,MAP2K1,MLLT6,RAD21,RAN,WTAP |
| PAX6    | 3 | pos_gene,CDX2,HOXA9,PAX5                            |
